# Supplementary material for: ABA Is Required for Plant Acclimation to a Combination of Salt and Heat Stress
Source: PLoS One. 2016 Jan 29;11(1):e0147625. doi: 10.1371/journal.pone.0147625 (PMC4733103; doi:10.1371/journal.pone.0147625)
Supplement: S8 Table — (XLSX) [file pone.0147625.s018.xlsx]

## Sheet: S8 Table
S8 Table Transcripts significantly down-regulated in response to heat stress
gene_id	locus	FPKM_Control	FPKM_Heat	log2(fold_change)	q_value	Type	Short_description	Curator summary	Description
AT3G26815	Chr3:9875524-9875737	12.5494	0	-.1797690+309	0.0222801	mirna	MIR169K; miRNA	Encodes a microRNA that targets several HAP2 family members. MicroRNAs are regulatory RNAs with a mature length of ~21-nucleotides that are processed from hairpin precursors by Dicer-like enzymes. MicroRNAs can negatively regulate gene expression by attenuating translation or by directing mRNA cleavage.Mature sequence: UAGCCAAGGAUGACUUGCCUG
AT4G17160	Chr4:9641979-9643541	1.1229	0	-.1797690+309	0.0221137	protein_coding	ATRABB1A (ARABIDOPSIS RAB GTPASE HOMOLOG B1A); GTP binding		ARABIDOPSIS RAB GTPASE HOMOLOG B1A (ATRABB1A); FUNCTIONS IN: GTP binding; INVOLVED IN: protein transport, small GTPase mediated signal transduction; CONTAINS InterPro DOMAIN/s: Ras GTPase (InterPro:IPR001806), Small GTP-binding protein (InterPro:IPR005225), Ras (InterPro:IPR013753), Ras small GTPase, Rab type (InterPro:IPR003579); BEST Arabidopsis thaliana protein match is: RABB1C (ARABIDOPSIS RA…
AT2G43010	Chr2:17886426-17889050	85.3082	66.7614	-0.353672	0.0459419	protein_coding	PIF4 (phytochrome interacting factor 4); DNA binding / protein binding / transcription factor	Isolated as a semidominant mutation defective in red -light responses. Encodes a nuclear localized bHLH protein that interacts with active PhyB protein. Negatively regulates phyB mediated red light responses. Involved in shade avoidance response. Protein abundance is negatively regulated by PhyB.	phytochrome interacting factor 4 (PIF4); FUNCTIONS IN: protein binding, transcription factor activity, DNA binding; INVOLVED IN: red or far red light signaling pathway, de-etiolation, red light signaling pathway; LOCATED IN: nucleus; EXPRESSED IN: 22 plant structures; EXPRESSED DURING: 13 growth stages; CONTAINS InterPro DOMAIN/s: Basic helix-loop-helix dimerisation region bHLH (InterPro:IPR00109…
AT1G36160	Chr1:13534164-13544008	23.9214	18.6817	-0.356678	0.0446209	protein_coding	ACC1 (ACETYL-COENZYME A CARBOXYLASE 1); acetyl-CoA carboxylase	Encodes acetyl-CoA carboxylase. Mutant displays uncoordinated cell divisions which are enhanced by cytokinins. Mutant also has aberrant organization of the apical region in the embryo and abnormal root and shoot development. Essential for very long chain fatty acid elongation.	ACETYL-COENZYME A CARBOXYLASE 1 (ACC1); FUNCTIONS IN: acetyl-CoA carboxylase activity; INVOLVED IN: in 7 processes; LOCATED IN: plasma membrane; EXPRESSED IN: 26 plant structures; EXPRESSED DURING: 13 growth stages; CONTAINS InterPro DOMAIN/s: Acetyl-coenzyme A carboxyltransferase, N-terminal (InterPro:IPR011762), Carboxyl transferase (InterPro:IPR000022), Biotin/lipoyl attachment (InterPro:IPR00…
AT3G15520	Chr3:5249111-5252506	52.6533	41.0738	-0.358305	0.049796	protein_coding	peptidyl-prolyl cis-trans isomerase TLP38, chloroplast / thylakoid lumen PPIase of 38 kDa / cyclophilin / rotamase		peptidyl-prolyl cis-trans isomerase TLP38, chloroplast / thylakoid lumen PPIase of 38 kDa / cyclophilin / rotamase; FUNCTIONS IN: peptidyl-prolyl cis-trans isomerase activity; LOCATED IN: thylakoid, thylakoid lumen, chloroplast thylakoid membrane, chloroplast thylakoid lumen, chloroplast; EXPRESSED IN: 22 plant structures; EXPRESSED DURING: 14 growth stages; CONTAINS InterPro DOMAIN/s: Cyclophili…
AT2G35490	Chr2:14912143-14913877	127.559	99.4105	-0.359689	0.0421034	protein_coding	plastid-lipid associated protein PAP, putative		plastid-lipid associated protein PAP, putative; FUNCTIONS IN: structural molecule activity; INVOLVED IN: biological_process unknown; LOCATED IN: thylakoid, chloroplast thylakoid membrane, chloroplast, plastoglobule; EXPRESSED IN: 24 plant structures; EXPRESSED DURING: 13 growth stages; CONTAINS InterPro DOMAIN/s: PAP fibrillin (InterPro:IPR006843); BEST Arabidopsis thaliana protein match is: plas…
AT5G44100	Chr5:17749117-17752716	40.8337	31.7974	-0.360849	0.0452442	protein_coding	ckl7 (Casein Kinase I-like 7); ATP binding / kinase/ protein kinase/ protein serine/threonine kinase		Casein Kinase I-like 7 (ckl7); FUNCTIONS IN: protein serine/threonine kinase activity, protein kinase activity, kinase activity, ATP binding; INVOLVED IN: protein amino acid phosphorylation; LOCATED IN: cellular_component unknown; EXPRESSED IN: guard cell; CONTAINS InterPro DOMAIN/s: Protein kinase, ATP binding site (InterPro:IPR017441), Protein kinase, core (InterPro:IPR000719), Serine/threonine…
AT1G67140	Chr1:25100907-25117372	12.5046	9.71971	-0.363473	0.0441004	protein_coding	SWEETIE (SWEETIE); binding		SWEETIE (SWEETIE); FUNCTIONS IN: binding; INVOLVED IN: trehalose metabolic process, carbohydrate metabolic process, starch metabolic process; LOCATED IN: cytosol; EXPRESSED IN: 25 plant structures; EXPRESSED DURING: 13 growth stages; CONTAINS InterPro DOMAIN/s: HEAT (InterPro:IPR000357), Armadillo-type fold (InterPro:IPR016024); Has 7920 Blast hits to 5141 proteins in 477 species: Archae - 32; Ba…
AT5G56030	Chr5:22686801-22689650	127.804	99.3253	-0.363701	0.0473332	protein_coding	HSP81-2 (HEAT SHOCK PROTEIN 81-2); ATP binding	a member of heat shock protein 90 (HSP90) gene family. Expressed in all tissues and abundant in root apical meristem, pollen and tapetum. Expression is NOT heat-induced but induced by IAA and NaCl.	HEAT SHOCK PROTEIN 81-2 (HSP81-2); FUNCTIONS IN: ATP binding; INVOLVED IN: in 9 processes; LOCATED IN: cytosol, mitochondrion, cell wall, nucleus; EXPRESSED IN: 28 plant structures; EXPRESSED DURING: 14 growth stages; CONTAINS InterPro DOMAIN/s: Heat shock protein Hsp90 (InterPro:IPR001404), ATP-binding region, ATPase-like (InterPro:IPR003594); BEST Arabidopsis thaliana protein match is: HSP81-3;…
AT4G36130	Chr4:17097564-17098879	141.831	110.215	-0.363848	0.0400647	protein_coding	60S ribosomal protein L8 (RPL8C)		60S ribosomal protein L8 (RPL8C); FUNCTIONS IN: structural constituent of ribosome; INVOLVED IN: translation; LOCATED IN: cytosolic ribosome, cytosolic large ribosomal subunit, ribosome, plasma membrane, vacuole; EXPRESSED IN: guard cell, cultured cell; CONTAINS InterPro DOMAIN/s: Translation protein SH3-like (InterPro:IPR008991), Nucleic acid-binding, OB-fold-like (InterPro:IPR016027), Nucleic a…
AT5G61530	Chr5:24742047-24744784	40.4826	31.4087	-0.366139	0.0498162	protein_coding	small G protein family protein / RhoGAP family protein		small G protein family protein / RhoGAP family protein; FUNCTIONS IN: Rho GTPase activator activity; INVOLVED IN: signal transduction; LOCATED IN: intracellular; EXPRESSED IN: 24 plant structures; EXPRESSED DURING: 15 growth stages; CONTAINS InterPro DOMAIN/s: Rho GTPase activation protein (InterPro:IPR008936), RhoGAP (InterPro:IPR000198); Has 3741 Blast hits to 3740 proteins in 138 species: Arch…
AT2G26670	Chr2:11341683-11343572	126.013	97.7589	-0.366269	0.032267	protein_coding	TED4 (REVERSAL OF THE DET PHENOTYPE 4); heme oxygenase (decyclizing)	Encodes a plastid heme oxygenase necessary for phytochrome chromophore biosynthesis and for coupling the expression of some nuclear genes to the functional state of the chloroplast.	REVERSAL OF THE DET PHENOTYPE 4 (TED4); FUNCTIONS IN: heme oxygenase (decyclizing) activity; INVOLVED IN: regulation of meristem growth, chloroplast-nucleus signaling pathway, red, far-red light phototransduction, heme oxidation, phytochromobilin biosynthetic process; LOCATED IN: chloroplast; EXPRESSED IN: 24 plant structures; EXPRESSED DURING: 13 growth stages; CONTAINS InterPro DOMAIN/s: Haem o…
AT5G13980	Chr5:4508495-4516892	44.2975	34.3611	-0.366447	0.0415423	protein_coding	glycosyl hydrolase family 38 protein		glycosyl hydrolase family 38 protein; FUNCTIONS IN: in 6 functions; INVOLVED IN: mannose metabolic process, carbohydrate metabolic process; LOCATED IN: apoplast, cell wall, plasma membrane, vacuole, plant-type cell wall; EXPRESSED IN: 25 plant structures; EXPRESSED DURING: 13 growth stages; CONTAINS InterPro DOMAIN/s: Glycoside hydrolase-type carbohydrate-binding (InterPro:IPR011013), Glycoside h…
AT5G16280	Chr5:5323174-5331685	13.6386	10.579	-0.366493	0.0488264	protein_coding	unknown protein		unknown protein; INVOLVED IN: biological_process unknown; LOCATED IN: endomembrane system; EXPRESSED IN: 23 plant structures; EXPRESSED DURING: 13 growth stages; Has 304 Blast hits to 222 proteins in 105 species: Archae - 0; Bacteria - 0; Metazoa - 183; Fungi - 73; Plants - 20; Viruses - 2; Other Eukaryotes - 26 (source: NCBI BLink).
AT3G13340	Chr3:4331755-4335073	31.6859	24.5407	-0.368664	0.046058	protein_coding	WD-40 repeat family protein		WD-40 repeat family protein; FUNCTIONS IN: molecular_function unknown; INVOLVED IN: biological_process unknown; LOCATED IN: CUL4 RING ubiquitin ligase complex, heterotrimeric G-protein complex; EXPRESSED IN: 24 plant structures; EXPRESSED DURING: 14 growth stages; CONTAINS InterPro DOMAIN/s: WD40 repeat-like (InterPro:IPR011046), WD40 repeat, region (InterPro:IPR017986), WD40/YVTN repeat-like (In…
AT3G16857	Chr3:5755820-5762235	17.2519	13.3406	-0.370934	0.04682	protein_coding	ARR1 (ARABIDOPSIS RESPONSE REGULATOR 1); transcription factor/ two-component response regulator	Encodes an Arabidopsis response regulator (ARR) protein that acts in concert with other type-B ARRs in the cytokinin signaling pathway.	ARABIDOPSIS RESPONSE REGULATOR 1 (ARR1); FUNCTIONS IN: transcription factor activity, two-component response regulator activity; INVOLVED IN: in 6 processes; LOCATED IN: nucleus; EXPRESSED IN: 29 plant structures; EXPRESSED DURING: 13 growth stages; CONTAINS InterPro DOMAIN/s: Response regulator, plant B-type (InterPro:IPR017053), Myb-like DNA-binding region, SHAQKYF class (InterPro:IPR006447), C…
AT4G02260	Chr4:985231-991494	46.0708	35.5366	-0.374547	0.043059	protein_coding	RSH1 (RELA-SPOT HOMOLOG 1); catalytic		RELA-SPOT HOMOLOG 1 (RSH1); FUNCTIONS IN: catalytic activity; INVOLVED IN: response to wounding; LOCATED IN: chloroplast; EXPRESSED IN: 24 plant structures; EXPRESSED DURING: 13 growth stages; CONTAINS InterPro DOMAIN/s: TGS-like (InterPro:IPR012676), Metal-dependent phosphohydrolase, HD region, subdomain (InterPro:IPR006674), TGS (InterPro:IPR004095), Beta-grasp fold, ferredoxin-type (InterPro:I…
AT5G44240	Chr5:17817618-17823708	17.3639	13.3862	-0.375339	0.0434027	protein_coding	haloacid dehalogenase-like hydrolase family protein		haloacid dehalogenase-like hydrolase family protein; FUNCTIONS IN: ATPase activity, coupled to transmembrane movement of ions, phosphorylative mechanism; INVOLVED IN: metabolic process, phospholipid transport, ATP biosynthetic process; LOCATED IN: integral to membrane, membrane; EXPRESSED IN: 25 plant structures; EXPRESSED DURING: 15 growth stages; CONTAINS InterPro DOMAIN/s: Haloacid dehalogenas…
AT1G03080	Chr1:731703-737332	18.4455	14.2139	-0.375963	0.0420693	protein_coding			FUNCTIONS IN: molecular_function unknown; INVOLVED IN: biological_process unknown; LOCATED IN: plasma membrane; EXPRESSED IN: 22 plant structures; EXPRESSED DURING: 13 growth stages; CONTAINS InterPro DOMAIN/s: Prefoldin (InterPro:IPR009053), KIP1-like (InterPro:IPR011684); BEST Arabidopsis thaliana protein match is: kinase interacting family protein (TAIR:AT3G22790.1); Has 169162 Blast hits to 6…
AT3G13200	Chr3:4242124-4244145	87.7286	67.5456	-0.377186	0.037864	protein_coding	EMB2769 (EMBRYO DEFECTIVE 2769)		EMBRYO DEFECTIVE 2769 (EMB2769); FUNCTIONS IN: molecular_function unknown; INVOLVED IN: nuclear mRNA splicing, via spliceosome; LOCATED IN: spliceosome; EXPRESSED IN: 24 plant structures; EXPRESSED DURING: 15 growth stages; CONTAINS InterPro DOMAIN/s: Cwf15/Cwc15 cell cycle control protein (InterPro:IPR006973); Has 5183 Blast hits to 3520 proteins in 255 species: Archae - 2; Bacteria - 176; Metaz…
AT5G62350	Chr5:25037425-25038362	258.463	198.938	-0.377636	0.0328525	protein_coding	invertase/pectin methylesterase inhibitor family protein / DC 1.2 homolog (FL5-2I22)		invertase/pectin methylesterase inhibitor family protein / DC 1.2 homolog (FL5-2I22); FUNCTIONS IN: enzyme inhibitor activity, pectinesterase inhibitor activity, pectinesterase activity; INVOLVED IN: response to salt stress; LOCATED IN: endomembrane system; EXPRESSED IN: 22 plant structures; EXPRESSED DURING: 13 growth stages; CONTAINS InterPro DOMAIN/s: Pectinesterase inhibitor (InterPro:IPR0065…
AT2G20050	Chr2:8649433-8654228	21.9153	16.8543	-0.378817	0.0354779	protein_coding	ATP binding / cAMP-dependent protein kinase regulator/ catalytic/ protein kinase/ protein serine/threonine phosphatase		ATP binding / cAMP-dependent protein kinase regulator/ catalytic/ protein kinase/ protein serine/threonine phosphatase; FUNCTIONS IN: cAMP-dependent protein kinase regulator activity, protein kinase activity, protein serine/threonine phosphatase activity, catalytic activity, ATP binding; INVOLVED IN: protein amino acid phosphorylation, protein amino acid dephosphorylation, N-terminal protein myri…
AT4G39450	Chr4:18347592-18355056	11.5218	8.85592	-0.379647	0.0409766	protein_coding	unknown protein		unknown protein; FUNCTIONS IN: molecular_function unknown; INVOLVED IN: biological_process unknown; LOCATED IN: cellular_component unknown; EXPRESSED IN: 22 plant structures; EXPRESSED DURING: 12 growth stages; Has 124 Blast hits to 89 proteins in 39 species: Archae - 0; Bacteria - 0; Metazoa - 94; Fungi - 0; Plants - 17; Viruses - 0; Other Eukaryotes - 13 (source: NCBI BLink).
AT5G03540	Chr5:889565-894167	34.5543	26.5141	-0.382103	0.0383412	protein_coding	ATEXO70A1 (exocyst subunit EXO70 family protein A1); protein binding	AtEXO70A1 is a member of EXO70 gene family, putative exocyst subunits, conserved in land plants. Arabidopsis thaliana contains 23 putative EXO70 genes, which can be classified into nine clusters on the phylogenetic tree	exocyst subunit EXO70 family protein A1 (ATEXO70A1); FUNCTIONS IN: protein binding; INVOLVED IN: lateral root morphogenesis, vesicle docking during exocytosis, root development; LOCATED IN: plasma membrane, membrane, exocyst; EXPRESSED IN: cultured cell, leaf; CONTAINS InterPro DOMAIN/s: Exo70 exocyst complex subunit (InterPro:IPR004140); BEST Arabidopsis thaliana protein match is: ATEXO70A2 (exo…
AT1G69390	Chr1:26084634-26086481	62.9951	48.2739	-0.383996	0.0422421	protein_coding	ATMINE1 (Arabidopsis homologue of bacterial MinE 1); protein binding	Encodes an Arabidopsis homologue of the bacterial MinE topological specificity factor ensuring correct division site placement. It is an essential integral component of the plastid division machinery.	Arabidopsis homologue of bacterial MinE 1 (ATMINE1); FUNCTIONS IN: protein binding; INVOLVED IN: chloroplast fission; LOCATED IN: chloroplast; EXPRESSED IN: 22 plant structures; EXPRESSED DURING: 13 growth stages; CONTAINS InterPro DOMAIN/s: Septum formation topological specificity factor MinE (InterPro:IPR005527); Has 122 Blast hits to 122 proteins in 52 species: Archae - 0; Bacteria - 80; Metaz…
AT4G01290	Chr4:537989-543869	35.2883	26.9785	-0.387379	0.0262296	protein_coding	unknown protein		unknown protein; FUNCTIONS IN: molecular_function unknown; INVOLVED IN: biological_process unknown; LOCATED IN: cellular_component unknown; EXPRESSED IN: 24 plant structures; EXPRESSED DURING: 15 growth stages; Has 1490 Blast hits to 1141 proteins in 165 species: Archae - 0; Bacteria - 129; Metazoa - 747; Fungi - 206; Plants - 73; Viruses - 0; Other Eukaryotes - 335 (source: NCBI BLink).
AT3G61260	Chr3:22675237-22676788	180.77	138.169	-0.387723	0.0272888	protein_coding	DNA-binding family protein / remorin family protein		DNA-binding family protein / remorin family protein; FUNCTIONS IN: binding; INVOLVED IN: biological_process unknown; LOCATED IN: plasma membrane, vacuole; EXPRESSED IN: 24 plant structures; EXPRESSED DURING: 16 growth stages; CONTAINS InterPro DOMAIN/s: Remorin, C-terminal region (InterPro:IPR005516), Remorin, N-terminal region (InterPro:IPR005518); BEST Arabidopsis thaliana protein match is: DNA…
AT3G57410	Chr3:21243135-21251100	38.3408	29.2973	-0.388115	0.0275065	protein_coding	VLN3 (VILLIN 3); actin binding	Encodes a protein with high homology to animal villin.	VILLIN 3 (VLN3); FUNCTIONS IN: actin binding; INVOLVED IN: cytoskeleton organization; LOCATED IN: cellular_component unknown; EXPRESSED IN: 23 plant structures; EXPRESSED DURING: 13 growth stages; CONTAINS InterPro DOMAIN/s: Gelsolin (InterPro:IPR007122), Villin headpiece (InterPro:IPR003128), Gelsolin region (InterPro:IPR007123); BEST Arabidopsis thaliana protein match is: VLN2 (VILLIN 2); actin…
AT3G50360	Chr3:18674336-18675712	70.4429	53.8211	-0.388282	0.0443302	protein_coding	ATCEN2 (CENTRIN2); calcium ion binding		CENTRIN2 (ATCEN2); FUNCTIONS IN: calcium ion binding; INVOLVED IN: biological_process unknown; LOCATED IN: plasma membrane; EXPRESSED IN: 24 plant structures; EXPRESSED DURING: 15 growth stages; CONTAINS InterPro DOMAIN/s: EF-HAND 1 (InterPro:IPR018247), EF-HAND 2 (InterPro:IPR018249), EF-Hand type (InterPro:IPR011992), Calcium-binding EF-hand (InterPro:IPR002048), EF hand (InterPro:IPR018248); B…
AT3G19900	Chr3:6922566-6925066	51.0749	38.9885	-0.389568	0.0411685	protein_coding	unknown protein		unknown protein; FUNCTIONS IN: molecular_function unknown; INVOLVED IN: biological_process unknown; LOCATED IN: chloroplast; EXPRESSED IN: 23 plant structures; EXPRESSED DURING: 13 growth stages; Has 218 Blast hits to 218 proteins in 62 species: Archae - 0; Bacteria - 94; Metazoa - 0; Fungi - 2; Plants - 24; Viruses - 0; Other Eukaryotes - 98 (source: NCBI BLink).
AT2G33170	Chr2:14056249-14060641	10.338	7.89013	-0.389834	0.0461568	protein_coding	leucine-rich repeat transmembrane protein kinase, putative		leucine-rich repeat transmembrane protein kinase, putative; FUNCTIONS IN: protein binding, protein serine/threonine kinase activity, protein kinase activity, ATP binding; INVOLVED IN: protein amino acid phosphorylation; LOCATED IN: endomembrane system; EXPRESSED IN: 22 plant structures; EXPRESSED DURING: 13 growth stages; CONTAINS InterPro DOMAIN/s: Protein kinase, core (InterPro:IPR000719), Leuc…
AT5G67260	Chr5:26836147-26837811	33.7529	25.7594	-0.389916	0.0445556	protein_coding	CYCD3;2 (CYCLIN D3;2); cyclin-dependent protein kinase	Encode CYCD3;2, a CYCD3 D-type cyclin. Important for determining cell number in developing lateral organs. Mediating cytokinin effects in apical growth and development.	CYCLIN D3;2 (CYCD3;2); FUNCTIONS IN: cyclin-dependent protein kinase activity; INVOLVED IN: regulation of cell cycle, regulation of cell proliferation; LOCATED IN: nucleus; EXPRESSED IN: 24 plant structures; EXPRESSED DURING: 13 growth stages; CONTAINS InterPro DOMAIN/s: Cyclin, C-terminal (InterPro:IPR004367), Cyclin D (InterPro:IPR015451), Cyclin-like (InterPro:IPR011028), Cyclin-related (Inter…
AT3G10380	Chr3:3219522-3228933	31.0359	23.6774	-0.390429	0.0270449	protein_coding	SEC8 (SUBUNIT OF EXOCYST COMPLEX 8)	Subunit of the Putative Arabidopsis Exocyst Complex	SUBUNIT OF EXOCYST COMPLEX 8 (SEC8); INVOLVED IN: pollen germination, pollen tube growth; LOCATED IN: plasma membrane, exocyst; EXPRESSED IN: 25 plant structures; EXPRESSED DURING: 13 growth stages; CONTAINS InterPro DOMAIN/s: Sec8 exocyst complex component specific domain (InterPro:IPR007191); Has 339 Blast hits to 250 proteins in 113 species: Archae - 0; Bacteria - 0; Metazoa - 194; Fungi - 94;…
AT2G44120	Chr2:18249041-18251156	158.736	121.094	-0.390499	0.0294415	protein_coding	60S ribosomal protein L7 (RPL7C)		60S ribosomal protein L7 (RPL7C); FUNCTIONS IN: structural constituent of ribosome, transcription regulator activity; INVOLVED IN: translation; LOCATED IN: in 7 components; EXPRESSED IN: 22 plant structures; EXPRESSED DURING: 13 growth stages; CONTAINS InterPro DOMAIN/s: Ribosomal protein L30, N-terminal (InterPro:IPR012988), Ribosomal protein L30p/L7e, N-terminal (InterPro:IPR000517), Ribosomal …
AT1G71810	Chr1:27002413-27008176	17.0694	13.0071	-0.392116	0.0453034	protein_coding	ABC1 family protein		ABC1 family protein; FUNCTIONS IN: protein kinase activity, ATP binding; INVOLVED IN: protein amino acid phosphorylation; LOCATED IN: chloroplast, plastoglobule; EXPRESSED IN: 22 plant structures; EXPRESSED DURING: 14 growth stages; CONTAINS InterPro DOMAIN/s: ABC-1 (InterPro:IPR004147), Protein kinase, core (InterPro:IPR000719), Protein kinase-like (InterPro:IPR011009); BEST Arabidopsis thaliana…
AT1G17360	Chr1:5946763-5951473	13.5292	10.3073	-0.392411	0.0430364	protein_coding			FUNCTIONS IN: molecular_function unknown; INVOLVED IN: biological_process unknown; LOCATED IN: cellular_component unknown; EXPRESSED IN: 22 plant structures; EXPRESSED DURING: 13 growth stages; BEST Arabidopsis thaliana protein match is: COP1-interacting protein-related (TAIR:AT1G72410.1); Has 8834 Blast hits to 6495 proteins in 406 species: Archae - 8; Bacteria - 626; Metazoa - 3389; Fungi - 793…
AT3G56360	Chr3:20896480-20897593	230.461	175.525	-0.39285	0.0266191	protein_coding	unknown protein		unknown protein; FUNCTIONS IN: molecular_function unknown; INVOLVED IN: biological_process unknown; LOCATED IN: chloroplast; EXPRESSED IN: 24 plant structures; EXPRESSED DURING: 15 growth stages; BEST Arabidopsis thaliana protein match is: unknown protein (TAIR:AT5G05250.1); Has 31 Blast hits to 31 proteins in 9 species: Archae - 0; Bacteria - 0; Metazoa - 0; Fungi - 0; Plants - 31; Viruses - 0; …
AT5G42870	Chr5:17185462-17189681	16.3142	12.4151	-0.394034	0.0381927	protein_coding	lipin family protein		lipin family protein; INVOLVED IN: biological_process unknown; LOCATED IN: apoplast, membrane; EXPRESSED IN: 24 plant structures; EXPRESSED DURING: 13 growth stages; CONTAINS InterPro DOMAIN/s: LNS2, Lipin/Ned1/Smp2 (InterPro:IPR013209), Lipin, N-terminal conserved region (InterPro:IPR007651); BEST Arabidopsis thaliana protein match is: lipin family protein (TAIR:AT3G09560.3); Has 1138 Blast hits…
AT4G39210	Chr4:18259608-18263417	20.6348	15.6759	-0.396533	0.045573	protein_coding	APL3; glucose-1-phosphate adenylyltransferase	Encodes the large subunit of ADP-Glucose Pyrophosphorylase which catalyzes the first, rate limiting step in starch biosynthesis. The large subunit plays a regulatory role whereas the small subunit (ApS) is the catalytic isoform. Four isoforms (ApL1-4) have been identified. ApL3 is the major large subunit isoform present in inflorescences, fruits and roots.	APL3; FUNCTIONS IN: glucose-1-phosphate adenylyltransferase activity; INVOLVED IN: starch biosynthetic process, response to sucrose stimulus; LOCATED IN: cellular_component unknown; EXPRESSED IN: 28 plant structures; EXPRESSED DURING: 15 growth stages; CONTAINS InterPro DOMAIN/s: Glucose-1-phosphate adenylyltransferase (InterPro:IPR011831), ADP-glucose pyrophosphorylase, conserved site (InterPro:…
AT1G04940	Chr1:1399181-1400770	83.1983	63.1354	-0.398104	0.0258934	protein_coding	TIC20 (TRANSLOCON AT THE INNER ENVELOPE MEMBRANE OF CHLOROPLASTS 20)	Tic20 is believed to function as a component of the protein-conducting channel at the inner envelope membrane. Genes AT1G04940 and AT1G04945 were switched for the TAIR7 genome release to give consistency with MIPs annotation.	TRANSLOCON AT THE INNER ENVELOPE MEMBRANE OF CHLOROPLASTS 20 (TIC20); LOCATED IN: membrane; CONTAINS InterPro DOMAIN/s: Chloroplast protein import component Tic20 (InterPro:IPR005691); BEST Arabidopsis thaliana protein match is: tic20-IV (TRANSLOCON AT THE INNER ENVELOPE MEMBRANE OF CHLOROPLASTS 20-IV) (TAIR:AT4G03320.1); Has 210 Blast hits to 209 proteins in 59 species: Archae - 0; Bacteria - 86…
AT3G14270	Chr3:4753924-4762395	18.1215	13.7461	-0.398682	0.0274284	protein_coding	phosphatidylinositol-4-phosphate 5-kinase family protein	Encodes a FYVE domain protein containing the following domains: FYVE + Chaperonin + PIP5K.	phosphatidylinositol-4-phosphate 5-kinase family protein; FUNCTIONS IN: 1-phosphatidylinositol-4-phosphate 5-kinase activity, phosphoinositide binding, zinc ion binding; INVOLVED IN: signal transduction; LOCATED IN: mitochondrion; EXPRESSED IN: 23 plant structures; EXPRESSED DURING: 15 growth stages; CONTAINS InterPro DOMAIN/s: Chaperonin Cpn60/TCP-1 (InterPro:IPR002423), Zinc finger, FYVE-type (…
AT5G24890	Chr5:8558190-8559406	45.437	34.4135	-0.400894	0.0379283	protein_coding	unknown protein		unknown protein; FUNCTIONS IN: molecular_function unknown; INVOLVED IN: biological_process unknown; LOCATED IN: cellular_component unknown; EXPRESSED IN: 23 plant structures; EXPRESSED DURING: 13 growth stages; BEST Arabidopsis thaliana protein match is: unknown protein (TAIR:AT2G24550.1); Has 719 Blast hits to 663 proteins in 155 species: Archae - 0; Bacteria - 8; Metazoa - 291; Fungi - 108; Pla…
AT2G07360	Chr2:3047305-3057183	27.453	20.7611	-0.403078	0.0219302	protein_coding	SH3 domain-containing protein		SH3 domain-containing protein; FUNCTIONS IN: binding; LOCATED IN: cytosol, nucleus, plasma membrane, membrane; EXPRESSED IN: 26 plant structures; EXPRESSED DURING: 15 growth stages; CONTAINS InterPro DOMAIN/s: Src homology-3 domain (InterPro:IPR001452), Armadillo-type fold (InterPro:IPR016024); Has 134 Blast hits to 94 proteins in 34 species: Archae - 0; Bacteria - 6; Metazoa - 12; Fungi - 11; Pl…
AT1G03310	Chr1:813470-816749	36.1266	27.2937	-0.404493	0.0424602	protein_coding	isoamylase, putative / starch debranching enzyme, putative	Encodes a protein with strong similarity to isoamylase (EC:3.2.1.68) however lacks critical residues known to be important for activity. Appears to co localize with ISA1 in the chloroplast isoamylase complex. Mutations in this gene cause the loss of detectable isoamylase activity and the disruption of normal starch structure. It has been postulated that AtISA2 interacts with AtISA1 to form the Is…	DEBRANCHING ENZYME 1 (DBE1); FUNCTIONS IN: isoamylase activity, alpha-amylase activity; INVOLVED IN: amylopectin biosynthetic process, carbohydrate metabolic process; LOCATED IN: chloroplast; EXPRESSED IN: 22 plant structures; EXPRESSED DURING: 13 growth stages; CONTAINS InterPro DOMAIN/s: Glycoside hydrolase, family 13, N-terminal (InterPro:IPR004193), Immunoglobulin E-set (InterPro:IPR014756), …
AT5G03760	Chr5:985674-990549	33.1941	25.0602	-0.405529	0.0243547	protein_coding	ATCSLA09; mannan synthase/ transferase, transferring glycosyl groups	encodes a beta-mannan synthase that is required for agrobacterium-mediated plant genetic transformation involves a complex interaction between the bacterium and the host plant. 3' UTR is involved in transcriptional regulation and the gene is expressed in the elongation zone of the root.	ATCSLA09; FUNCTIONS IN: transferase activity, transferring glycosyl groups, mannan synthase activity; INVOLVED IN: DNA mediated transformation, response to bacterium; LOCATED IN: cellular_component unknown; EXPRESSED IN: 24 plant structures; EXPRESSED DURING: 15 growth stages; CONTAINS InterPro DOMAIN/s: Glycosyl transferase, family 2 (InterPro:IPR001173); BEST Arabidopsis thaliana protein match …
AT3G14205	Chr3:4715706-4720951	18.6119	14.037	-0.406985	0.0288845	protein_coding	phosphoinositide phosphatase family protein		phosphoinositide phosphatase family protein; FUNCTIONS IN: phosphatidylinositol-4,5-bisphosphate 5-phosphatase activity; INVOLVED IN: biological_process unknown; LOCATED IN: cellular_component unknown; EXPRESSED IN: 24 plant structures; EXPRESSED DURING: 15 growth stages; CONTAINS InterPro DOMAIN/s: Synaptojanin, N-terminal (InterPro:IPR002013); BEST Arabidopsis thaliana protein match is: phospho…
AT5G11840	Chr5:3813448-3814805	43.7503	32.9927	-0.407145	0.0438143	protein_coding	unknown protein		unknown protein; FUNCTIONS IN: molecular_function unknown; INVOLVED IN: biological_process unknown; LOCATED IN: chloroplast; EXPRESSED IN: 23 plant structures; EXPRESSED DURING: 13 growth stages; CONTAINS InterPro DOMAIN/s: Protein of unknown function DUF1230 (InterPro:IPR009631); BEST Arabidopsis thaliana protein match is: unknown protein (TAIR:AT5G67370.1); Has 259 Blast hits to 259 proteins in…
AT3G09410	Chr3:2894811-2901019	22.7652	17.1527	-0.408397	0.0450454	protein_coding	pectinacetylesterase family protein		pectinacetylesterase family protein; FUNCTIONS IN: carboxylesterase activity; INVOLVED IN: biological_process unknown; EXPRESSED IN: 22 plant structures; EXPRESSED DURING: 14 growth stages; CONTAINS InterPro DOMAIN/s: Pectinacetylesterase (InterPro:IPR004963); BEST Arabidopsis thaliana protein match is: unknown protein (TAIR:AT3G09405.1); Has 403 Blast hits to 396 proteins in 77 species: Archae -…
AT1G70210	Chr1:26439863-26442829	16.4426	12.3868	-0.408629	0.0478934	protein_coding	CYCD1;1 (CYCLIN D1;1); cyclin-dependent protein kinase regulator	Encodes a D-type cyclin that physically interacts with CDC2A. Its expression is upregulated early during germination.	CYCLIN D1;1 (CYCD1;1); FUNCTIONS IN: cyclin-dependent protein kinase regulator activity; INVOLVED IN: regulation of cell cycle, G1 phase of mitotic cell cycle; LOCATED IN: nucleus; EXPRESSED IN: 23 plant structures; EXPRESSED DURING: 13 growth stages; CONTAINS InterPro DOMAIN/s: Cyclin, C-terminal (InterPro:IPR004367), Cyclin D (InterPro:IPR015451), Cyclin-like (InterPro:IPR011028), Cyclin-relate…
AT2G36930	Chr2:15509897-15511514	52.8979	39.8092	-0.410108	0.0456008	protein_coding	zinc finger (C2H2 type) family protein		zinc finger (C2H2 type) family protein; FUNCTIONS IN: zinc ion binding, nucleic acid binding; INVOLVED IN: biological_process unknown; LOCATED IN: intracellular; EXPRESSED IN: 23 plant structures; EXPRESSED DURING: 13 growth stages; CONTAINS InterPro DOMAIN/s: Zinc finger, C2H2-like (InterPro:IPR015880), Zinc finger, U1-type (InterPro:IPR003604), Zinc finger, C2H2-type (InterPro:IPR007087); Has 5…
AT5G38560	Chr5:15439248-15443164	13.1542	9.89932	-0.41012	0.0406027	protein_coding	protein kinase family protein		protein kinase family protein; FUNCTIONS IN: structural constituent of cell wall, protein serine/threonine kinase activity, protein kinase activity, kinase activity, ATP binding; INVOLVED IN: protein amino acid phosphorylation; LOCATED IN: plasma membrane; EXPRESSED IN: 23 plant structures; EXPRESSED DURING: 13 growth stages; CONTAINS InterPro DOMAIN/s: Protein kinase, ATP binding site (InterPro:…
AT2G05940	Chr2:2287237-2289307	22.8575	17.1977	-0.410451	0.0402602	protein_coding	protein kinase, putative		protein kinase, putative; FUNCTIONS IN: protein serine/threonine kinase activity, protein kinase activity, kinase activity, ATP binding; INVOLVED IN: protein amino acid phosphorylation; LOCATED IN: cellular_component unknown; EXPRESSED IN: 22 plant structures; EXPRESSED DURING: 13 growth stages; CONTAINS InterPro DOMAIN/s: Protein kinase, core (InterPro:IPR000719), Serine/threonine protein kinase…
AT2G26780	Chr2:11410075-11423776	12.7151	9.56592	-0.410573	0.0223594	protein_coding	binding		binding; FUNCTIONS IN: binding; INVOLVED IN: biological_process unknown; LOCATED IN: membrane; EXPRESSED IN: 22 plant structures; EXPRESSED DURING: 13 growth stages; CONTAINS InterPro DOMAIN/s: HEAT (InterPro:IPR000357), Armadillo-like helical (InterPro:IPR011989), Armadillo-type fold (InterPro:IPR016024); Has 325 Blast hits to 275 proteins in 96 species: Archae - 0; Bacteria - 0; Metazoa - 149; …
AT5G15310	Chr5:4974670-4976227	31.7109	23.8528	-0.410819	0.0400702	protein_coding	ATMYB16 (MYB DOMAIN PROTEIN 16); DNA binding / transcription factor	Member of the R2R3 factor gene family.	MYB DOMAIN PROTEIN 16 (ATMYB16); FUNCTIONS IN: transcription factor activity, DNA binding; INVOLVED IN: in 9 processes; EXPRESSED IN: 19 plant structures; EXPRESSED DURING: 12 growth stages; CONTAINS InterPro DOMAIN/s: SANT, DNA-binding (InterPro:IPR001005), Homeodomain-like (InterPro:IPR009057), Myb, DNA-binding (InterPro:IPR014778), Myb-type HTH DNA-binding domain (InterPro:IPR017930), Homeodom…
AT2G27150	Chr2:11601753-11608450	8.24036	6.19377	-0.411888	0.0404038	protein_coding	AAO3 (Abscisic ALDEHYDE OXIDASE 3); abscisic aldehyde oxidase/ aldehyde oxidase/ indole-3-acetaldehyde oxidase	Encodes the aldehyde oxidase delta isoform catalyzing the final step in abscisic acid biosynthesis.	Abscisic ALDEHYDE OXIDASE 3 (AAO3); FUNCTIONS IN: abscisic aldehyde oxidase activity, indole-3-acetaldehyde oxidase activity, aldehyde oxidase activity; INVOLVED IN: abscisic acid biosynthetic process; LOCATED IN: cellular_component unknown; EXPRESSED IN: 26 plant structures; EXPRESSED DURING: 13 growth stages; CONTAINS InterPro DOMAIN/s: Aldehyde oxidase/xanthine dehydrogenase (InterPro:IPR01620…
AT5G19390	Chr5:6531537-6538483	27.5655	20.7155	-0.412152	0.0323475	protein_coding	pleckstrin homology (PH) domain-containing protein / RhoGAP domain-containing protein	Encodes a protein with similarity to REN1, a Rho GTPase activating protein.	pleckstrin homology (PH) domain-containing protein / RhoGAP domain-containing protein; FUNCTIONS IN: Rho GTPase activator activity, phosphoinositide binding; INVOLVED IN: signal transduction; LOCATED IN: chloroplast thylakoid membrane; EXPRESSED IN: guard cell, cultured cell; CONTAINS InterPro DOMAIN/s: Pleckstrin homology-type (InterPro:IPR011993), Rho GTPase activation protein (InterPro:IPR0089…
AT1G01610	Chr1:221690-224340	27.912	20.9749	-0.412222	0.0293145	protein_coding	GPAT4 (GLYCEROL-3-PHOSPHATE ACYLTRANSFERASE 4); 1-acylglycerol-3-phosphate O-acyltransferase/ acyltransferase	Encodes a protein with glycerol-3-phosphate acyltransferase activity. Involved in cutin assembly. Is functional redundant of GPAT8.	GLYCEROL-3-PHOSPHATE ACYLTRANSFERASE 4 (GPAT4); FUNCTIONS IN: 1-acylglycerol-3-phosphate O-acyltransferase activity, acyltransferase activity; INVOLVED IN: cutin biosynthetic process, metabolic process; EXPRESSED IN: 25 plant structures; EXPRESSED DURING: 14 growth stages; CONTAINS InterPro DOMAIN/s: Phospholipid/glycerol acyltransferase (InterPro:IPR002123); BEST Arabidopsis thaliana protein mat…
AT3G59290	Chr3:21911600-21917844	9.03081	6.77734	-0.414136	0.0424893	protein_coding	epsin N-terminal homology (ENTH) domain-containing protein		epsin N-terminal homology (ENTH) domain-containing protein; FUNCTIONS IN: binding; EXPRESSED IN: 6 plant structures; EXPRESSED DURING: L mature pollen stage, M germinated pollen stage, 4 anthesis, petal differentiation and expansion stage; CONTAINS InterPro DOMAIN/s: Epsin, N-terminal (InterPro:IPR001026), Epsin-like, N-terminal (InterPro:IPR013809), ENTH/VHS (InterPro:IPR008942); BEST Arabidopsi…
AT2G43210	Chr2:17960699-17963727	18.3071	13.729	-0.415176	0.0424479	protein_coding	UBX domain-containing protein		UBX domain-containing protein; FUNCTIONS IN: molecular_function unknown; INVOLVED IN: biological_process unknown; LOCATED IN: cellular_component unknown; EXPRESSED IN: 22 plant structures; EXPRESSED DURING: 13 growth stages; CONTAINS InterPro DOMAIN/s: UBX (InterPro:IPR001012); Has 1155 Blast hits to 742 proteins in 155 species: Archae - 0; Bacteria - 70; Metazoa - 347; Fungi - 206; Plants - 87; …
AT1G49480	Chr1:18314177-18316645	32.6985	24.4913	-0.416958	0.0277176	protein_coding	RTV1 (related to vernalization1 1); DNA binding / transcription factor		related to vernalization1 1 (RTV1); FUNCTIONS IN: transcription factor activity, DNA binding; INVOLVED IN: regulation of transcription, DNA-dependent; LOCATED IN: cellular_component unknown; EXPRESSED IN: 22 plant structures; EXPRESSED DURING: 13 growth stages; CONTAINS InterPro DOMAIN/s: Transcriptional factor B3 (InterPro:IPR003340); BEST Arabidopsis thaliana protein match is: VRN1 (REDUCED VER…
AT3G21630	Chr3:7615384-7618581	21.2906	15.9397	-0.41759	0.0319373	protein_coding	CERK1 (CHITIN ELICITOR RECEPTOR KINASE 1); kinase/ receptor signaling protein/ transmembrane receptor protein kinase	LysM receptor-like kinase. Essential in the perception and transduction of the chitin oligosaccharide elicitor. Involved in chitin-mediated plant innate immunity. Located in the plasma membrane.	CHITIN ELICITOR RECEPTOR KINASE 1 (CERK1); FUNCTIONS IN: transmembrane receptor protein kinase activity, receptor signaling protein activity, kinase activity; INVOLVED IN: defense response to fungus, incompatible interaction, response to chitin, detection of molecule of fungal origin; LOCATED IN: plasma membrane; EXPRESSED IN: 23 plant structures; EXPRESSED DURING: 13 growth stages; CONTAINS Inte…
AT2G44620	Chr2:18414250-18415303	89.6162	67.0739	-0.418007	0.0292911	protein_coding	MTACP-1 (MITOCHONDRIAL ACYL CARRIER PROTEIN 1); acyl carrier/ cofactor binding / phosphopantetheine binding	Encodes a member of the mitochondrial acyl carrier protein (ACP) family. As part of the mitochondrial matrix, it is likely to be involved in fatty acid or lipoic acid biogenesis. Its acylated form is predominantly present in the mitochondrial membrane while the non-acylated form is soluble.	MITOCHONDRIAL ACYL CARRIER PROTEIN 1 (MTACP-1); FUNCTIONS IN: phosphopantetheine binding, acyl carrier activity, cofactor binding; INVOLVED IN: fatty acid biosynthetic process; LOCATED IN: mitochondrion, mitochondrial matrix; EXPRESSED IN: 23 plant structures; EXPRESSED DURING: 15 growth stages; CONTAINS InterPro DOMAIN/s: Phosphopantetheine-binding (InterPro:IPR006163), Acyl carrier protein (ACP…
AT5G13280	Chr5:4249437-4252836	26.7248	20.002	-0.418038	0.026359	protein_coding	AK-LYS1 (ASPARTATE KINASE 1); aspartate kinase	Asp kinase inhibited by Lys and S-adenosylmethionine. Contains regulatory domains that belong to the ACT domain family, which allow binding to a extreme variety of ligands. Can function as a monomer or as a dimer with acetohydroxyacid synthase (HSDH).	ASPARTATE KINASE 1 (AK-LYS1); FUNCTIONS IN: aspartate kinase activity; INVOLVED IN: amino acid biosynthetic process; LOCATED IN: chloroplast; EXPRESSED IN: 24 plant structures; EXPRESSED DURING: 15 growth stages; CONTAINS InterPro DOMAIN/s: Aspartate kinase, conserved site (InterPro:IPR018042), Aspartate/glutamate/uridylate kinase (InterPro:IPR001048), Amino acid-binding ACT (InterPro:IPR002912),…
AT5G47750	Chr5:19338510-19342361	16.3551	12.2403	-0.418095	0.0370692	protein_coding	D6PKL2 (D6 PROTEIN KINASE LIKE 2); kinase		D6 PROTEIN KINASE LIKE 2 (D6PKL2); FUNCTIONS IN: kinase activity; INVOLVED IN: protein amino acid phosphorylation; LOCATED IN: nucleolus, nucleus, cytoplasm; EXPRESSED IN: 22 plant structures; EXPRESSED DURING: 13 growth stages; CONTAINS InterPro DOMAIN/s: Protein kinase, core (InterPro:IPR000719), Serine/threonine protein kinase (InterPro:IPR002290), Serine/threonine protein kinase-related (Inte…
AT2G16400	Chr2:7101329-7103921	23.2773	17.3878	-0.420849	0.0262341	protein_coding	BLH7 (bell1-like homeodomain 7); DNA binding / transcription factor		bell1-like homeodomain 7 (BLH7); FUNCTIONS IN: transcription factor activity, DNA binding; INVOLVED IN: regulation of transcription, DNA-dependent, regulation of transcription; LOCATED IN: nucleus; EXPRESSED IN: 22 plant structures; EXPRESSED DURING: 13 growth stages; CONTAINS InterPro DOMAIN/s: Homeobox, conserved site (InterPro:IPR017970), Homeobox (InterPro:IPR001356), Homeodomain-like (InterP…
AT3G15840	Chr3:5356636-5358500	529.193	395.252	-0.421021	0.0491957	protein_coding	PIFI (post-illumination chlorophyll fluorescence increase)	Encodes a chloroplast-targeted protein localized in the stroma that is a novel component essential for NDH-mediated non-photochemical reduction of the plastoquinone pool in chlororespiratory electron transport.	post-illumination chlorophyll fluorescence increase (PIFI); FUNCTIONS IN: molecular_function unknown; INVOLVED IN: chlororespiration; LOCATED IN: thylakoid, chloroplast stroma, chloroplast; EXPRESSED IN: 21 plant structures; EXPRESSED DURING: 13 growth stages; Has 31 Blast hits to 31 proteins in 8 species: Archae - 0; Bacteria - 0; Metazoa - 0; Fungi - 0; Plants - 27; Viruses - 0; Other Eukaryote…
AT5G27950	Chr5:9984050-9987990	23.5363	17.5475	-0.423626	0.0190351	protein_coding	kinesin motor protein-related		kinesin motor protein-related; FUNCTIONS IN: microtubule motor activity, ATP binding; INVOLVED IN: microtubule-based movement; LOCATED IN: microtubule associated complex; EXPRESSED IN: 22 plant structures; EXPRESSED DURING: 13 growth stages; CONTAINS InterPro DOMAIN/s: Kinesin, motor region (InterPro:IPR001752); BEST Arabidopsis thaliana protein match is: ATP binding / microtubule motor (TAIR:AT1…
AT5G08450	Chr5:2727820-2732893	27.1112	20.1998	-0.424547	0.0199113	protein_coding			FUNCTIONS IN: molecular_function unknown; INVOLVED IN: biological_process unknown; LOCATED IN: cellular_component unknown; EXPRESSED IN: 25 plant structures; EXPRESSED DURING: 15 growth stages; CONTAINS InterPro DOMAIN/s: Histone deacetylation protein Rxt3 (InterPro:IPR013951); Has 32702 Blast hits to 18312 proteins in 878 species: Archae - 45; Bacteria - 1760; Metazoa - 16233; Fungi - 3347; Plan…
AT3G62360	Chr3:23072785-23080563	33.7779	25.1551	-0.425229	0.0145816	protein_coding	carbohydrate binding		carbohydrate binding; FUNCTIONS IN: carbohydrate binding; LOCATED IN: endoplasmic reticulum, plasma membrane, plant-type cell wall; EXPRESSED IN: 25 plant structures; EXPRESSED DURING: 13 growth stages; CONTAINS InterPro DOMAIN/s: Carbohydrate-binding-like fold (InterPro:IPR013784), Collagen-binding surface protein Cna-like, B region (InterPro:IPR008454); Has 234 Blast hits to 193 proteins in 70 …
AT5G50210	Chr5:20442646-20445991	16.544	12.3196	-0.42535	0.0282167	protein_coding	QS (QUINOLINATE SYNTHASE); 4 iron, 4 sulfur cluster binding / enzyme activator/ protein homodimerization/ quinolinate synthetase A	Encodes an Fe-S binding protein with quinolinate synthase (QS) activity and cysteine desulfurase activator activity. The QS activity was demonstrated by functional complementation of corresponding E. coli mutants and complementation of embryo-lethal phenotypes of the QS homozygous null allele in Arabidopsis. The SufE domain of the protein also stimulates the cysteine desulfurase activity of CpNif…	QUINOLINATE SYNTHASE (QS); FUNCTIONS IN: 4 iron, 4 sulfur cluster binding, enzyme activator activity, protein homodimerization activity, quinolinate synthetase A activity; INVOLVED IN: in 6 processes; LOCATED IN: chloroplast; EXPRESSED IN: 23 plant structures; EXPRESSED DURING: 14 growth stages; CONTAINS InterPro DOMAIN/s: Fe-S metabolism associated SufE (InterPro:IPR003808), Quinolinate syntheta…
AT2G21300	Chr2:9114153-9119946	16.1521	12.0276	-0.42538	0.0367199	protein_coding	kinesin motor family protein		kinesin motor family protein; FUNCTIONS IN: microtubule motor activity, ATP binding; INVOLVED IN: microtubule-based movement; LOCATED IN: plasma membrane; EXPRESSED IN: 22 plant structures; EXPRESSED DURING: 11 growth stages; CONTAINS InterPro DOMAIN/s: Kinesin, motor region (InterPro:IPR001752); BEST Arabidopsis thaliana protein match is: kinesin motor family protein (TAIR:AT4G38950.2); Has 7485…
AT3G47250	Chr3:17399876-17401731	72.0786	53.6683	-0.425502	0.0267038	protein_coding	unknown protein		unknown protein; INVOLVED IN: biological_process unknown; LOCATED IN: cellular_component unknown; EXPRESSED IN: 21 plant structures; EXPRESSED DURING: 13 growth stages; CONTAINS InterPro DOMAIN/s: Protein of unknown function DUF247, plant (InterPro:IPR004158); BEST Arabidopsis thaliana protein match is: unknown protein (TAIR:AT3G47200.2); Has 496 Blast hits to 450 proteins in 15 species: Archae -…
AT5G03660	Chr5:937976-940058	111.606	83.0944	-0.425595	0.0173077	protein_coding	unknown protein		unknown protein; FUNCTIONS IN: molecular_function unknown; INVOLVED IN: biological_process unknown; LOCATED IN: plasma membrane; EXPRESSED IN: 22 plant structures; EXPRESSED DURING: 13 growth stages; CONTAINS InterPro DOMAIN/s: Protein of unknown function DUF662 (InterPro:IPR007033); BEST Arabidopsis thaliana protein match is: unknown protein (TAIR:AT3G09980.1); Has 5235 Blast hits to 3832 protei…
AT4G01800	Chr4:769864-776131	86.8684	64.6703	-0.425728	0.0185014	protein_coding	preprotein translocase secA subunit, putative		preprotein translocase secA subunit, putative; FUNCTIONS IN: protein binding, ATP binding; INVOLVED IN: intracellular protein transport, protein targeting, protein import; LOCATED IN: chloroplast stroma, chloroplast, chloroplast envelope; EXPRESSED IN: 23 plant structures; EXPRESSED DURING: 13 growth stages; CONTAINS InterPro DOMAIN/s: SecA Wing and Scaffold (InterPro:IPR011116), SecA preprotein …
AT5G04560	Chr5:1309192-1318401	16.7387	12.4374	-0.428501	0.0182086	protein_coding	DME (DEMETER); DNA N-glycosylase/ DNA-(apurinic or apyrimidinic site) lyase	Encodes a DNA glycosylase DEMETER (DME). Responsible for endosperm maternal-allele-specific hypomethylation at the MEDEA (MEA) gene. DME can excise 5-methylcytosine in vitro and when expressed in E. coli. DME establishes MEA imprinting by removing 5-methylcytosine to activate the maternal allele.	DEMETER (DME); FUNCTIONS IN: DNA N-glycosylase activity, DNA-(apurinic or apyrimidinic site) lyase activity; INVOLVED IN: embryonic development ending in seed dormancy, genetic imprinting, DNA methylation; LOCATED IN: nucleus, polar nucleus; EXPRESSED IN: 23 plant structures; EXPRESSED DURING: 14 growth stages; CONTAINS InterPro DOMAIN/s: DNA glycosylase (InterPro:IPR011257), Endonuclease III-lik…
AT4G33980	Chr4:16282795-16285058	46.5983	34.601	-0.429466	0.0284494	protein_coding	unknown protein		unknown protein; FUNCTIONS IN: molecular_function unknown; INVOLVED IN: biological_process unknown; LOCATED IN: cellular_component unknown; EXPRESSED IN: 24 plant structures; EXPRESSED DURING: 15 growth stages; BEST Arabidopsis thaliana protein match is: unknown protein (TAIR:AT5G42900.3); Has 38 Blast hits to 34 proteins in 9 species: Archae - 0; Bacteria - 0; Metazoa - 2; Fungi - 6; Plants - 29…
AT1G14400	Chr1:4927010-4928690	144.294	106.905	-0.432688	0.0140414	protein_coding	UBC1 (UBIQUITIN CARRIER PROTEIN 1); ubiquitin-protein ligase	ubiquitin carrier protein	UBIQUITIN CARRIER PROTEIN 1 (UBC1); FUNCTIONS IN: ubiquitin-protein ligase activity; INVOLVED IN: negative regulation of flower development, histone H2B ubiquitination, vegetative to reproductive phase transition, leaf morphogenesis, ubiquitin-dependent protein catabolic process; EXPRESSED IN: 24 plant structures; EXPRESSED DURING: 16 growth stages; CONTAINS InterPro DOMAIN/s: Ubiquitin-conjugati…
AT3G23980	Chr3:8662432-8667752	17.4062	12.8848	-0.433935	0.0215391	protein_coding	unknown protein		unknown protein; FUNCTIONS IN: molecular_function unknown; INVOLVED IN: biological_process unknown; LOCATED IN: cellular_component unknown; EXPRESSED IN: 23 plant structures; EXPRESSED DURING: 13 growth stages; Has 26003 Blast hits to 15357 proteins in 1029 species: Archae - 180; Bacteria - 2829; Metazoa - 13108; Fungi - 2139; Plants - 868; Viruses - 84; Other Eukaryotes - 6795 (source: NCBI BLin…
AT2G31040	Chr2:13208666-13211085	195.048	144.344	-0.434318	0.0131813	protein_coding	ATP synthase protein I -related		ATP synthase protein I -related; FUNCTIONS IN: hydrogen ion transmembrane transporter activity; INVOLVED IN: ATP synthesis coupled proton transport; LOCATED IN: proton-transporting ATP synthase complex, coupling factor F(o), chloroplast; EXPRESSED IN: 22 plant structures; EXPRESSED DURING: 13 growth stages; CONTAINS InterPro DOMAIN/s: ATPase, F0 complex, subunit I, bacillus-type (InterPro:IPR0084…
AT5G66050	Chr5:26412087-26414536	22.2102	16.4206	-0.435718	0.0461903	protein_coding			LOCATED IN: chloroplast; EXPRESSED IN: 24 plant structures; EXPRESSED DURING: 15 growth stages; CONTAINS InterPro DOMAIN/s: Protein of unknown function DUF151 (InterPro:IPR003729); BEST Arabidopsis thaliana protein match is: wound-responsive family protein (TAIR:AT1G19660.2); Has 338 Blast hits to 338 proteins in 128 species: Archae - 11; Bacteria - 214; Metazoa - 0; Fungi - 0; Plants - 67; Virus…
AT1G29390	Chr1:10286292-10288103	93.3127	68.9663	-0.436181	0.0192636	protein_coding	COR314-TM2	encodes a protein similar to the cold acclimation protein WCOR413 in wheat. Possibly targeted to thylakoid membrane.	COR314-TM2; FUNCTIONS IN: molecular_function unknown; INVOLVED IN: response to stress; LOCATED IN: chloroplast; EXPRESSED IN: 24 plant structures; EXPRESSED DURING: 15 growth stages; CONTAINS InterPro DOMAIN/s: Cold acclimation WCOR413 (InterPro:IPR008892); BEST Arabidopsis thaliana protein match is: COR414-TM1 (TAIR:AT1G29395.1); Has 90 Blast hits to 89 proteins in 22 species: Archae - 0; Bacter…
AT5G26570	Chr5:9261579-9267729	117.332	86.7167	-0.43621	0.019815	protein_coding	ATGWD3; carbohydrate kinase/ catalytic/ phosphoglucan, water dikinase	chloroplastidic phosphoglucan, water dikinase (PWD) which is required for normal degradation of leaf starch in Arabidopsis. NMR analysis of the mutants, suggests that the gene is specifically involved in the phosphorylation of the glucosyl residues of starch at the C3 position.	ATGWD3; FUNCTIONS IN: carbohydrate kinase activity, phosphoglucan, water dikinase activity, catalytic activity; INVOLVED IN: protein amino acid autophosphorylation, carbohydrate metabolic process, starch metabolic process, starch catabolic process; LOCATED IN: chloroplast stroma, chloroplast, plastid; EXPRESSED IN: 25 plant structures; EXPRESSED DURING: 13 growth stages; CONTAINS InterPro DOMAIN/…
AT5G08120	Chr5:2600473-2602927	20.5722	15.1952	-0.437083	0.0386143	protein_coding	MBP2C (MICROTUBULE BINDING PROTEIN 2C); protein binding	Microtubule-associated and viral movement protein binding protein. Negatively regulates KN1 association to plasmodesmata and, consequently, cell-to-cell transport. Involved in the alignment of cortical microtubules, the patterning of stomata and in restricting tobamoviral infections.	MICROTUBULE BINDING PROTEIN 2C (MBP2C); FUNCTIONS IN: protein binding; INVOLVED IN: defense response to virus, cortical microtubule organization, response to water deprivation, stomatal complex patterning, plasmodesmata-mediated intercellular transport; LOCATED IN: microtubule cytoskeleton; EXPRESSED IN: 26 plant structures; EXPRESSED DURING: 13 growth stages; BEST Arabidopsis thaliana protein ma…
AT4G27700	Chr4:13823587-13827823	196.756	145.298	-0.437401	0.0169249	protein_coding	rhodanese-like domain-containing protein		rhodanese-like domain-containing protein; FUNCTIONS IN: molecular_function unknown; INVOLVED IN: aging; LOCATED IN: chloroplast thylakoid membrane, chloroplast; EXPRESSED IN: 21 plant structures; EXPRESSED DURING: 13 growth stages; CONTAINS InterPro DOMAIN/s: Rhodanese-like (InterPro:IPR001763); BEST Arabidopsis thaliana protein match is: rhodanese-like domain-containing protein (TAIR:AT3G08920.1…
AT5G46070	Chr5:18683363-18688707	18.2097	13.444	-0.437743	0.0161571	protein_coding	GTP binding / GTPase		GTP binding / GTPase; FUNCTIONS IN: GTP binding, GTPase activity; INVOLVED IN: immune response; LOCATED IN: nucleolus, chloroplast; EXPRESSED IN: 24 plant structures; EXPRESSED DURING: 14 growth stages; CONTAINS InterPro DOMAIN/s: Guanylate-binding protein, N-terminal (InterPro:IPR015894), Guanylate-binding protein-like, C-terminal (InterPro:IPR015900), Guanylate-binding protein, C-terminal (Inte…
AT3G59770	Chr3:22079032-22086149	17.8494	13.1636	-0.439325	0.0133656	protein_coding	SAC9; inositol or phosphatidylinositol phosphatase	Encodes a phosphoinositide phosphatase. The sac9 null mutant accumulates elevated levels of PtdIns(4,5)P2 and Ins(1,4,5)P3. The mutant plants have characteristics of constitutive stress responses.	SAC9; FUNCTIONS IN: inositol or phosphatidylinositol phosphatase activity; INVOLVED IN: phosphatidylinositol metabolic process, response to high light intensity, response to cold, phosphoinositide-mediated signaling, response to osmotic stress; EXPRESSED IN: 24 plant structures; EXPRESSED DURING: 14 growth stages; CONTAINS InterPro DOMAIN/s: WW/Rsp5/WWP (InterPro:IPR001202), Synaptojanin, N-termi…
AT5G62000	Chr5:24910357-24915214	96.133	70.889	-0.439471	0.0168567	protein_coding	ARF2 (AUXIN RESPONSE FACTOR 2); protein binding / transcription factor	Encodes an auxin response factor. Mutants have many defects including enlarged rosette leaves, reduced fertility, later senescence, hypocotyl elongation defects, enlarged seeds and enlarged cotyledons. May not mediate auxin effects. Increase in seed size due to increased cell proliferation.	AUXIN RESPONSE FACTOR 2 (ARF2); FUNCTIONS IN: protein binding, transcription factor activity; INVOLVED IN: in 7 processes; LOCATED IN: nucleus, chloroplast; EXPRESSED IN: 24 plant structures; EXPRESSED DURING: 13 growth stages; CONTAINS InterPro DOMAIN/s: Aux/IAA-ARF-dimerisation (InterPro:IPR011525), Transcriptional factor B3 (InterPro:IPR003340), AUX/IAA protein (InterPro:IPR003311), Auxin resp…
AT1G77300	Chr1:29039921-29048810	12.7664	9.41138	-0.439878	0.0496721	protein_coding	EFS (EARLY FLOWERING IN SHORT DAYS); histone methyltransferase(H3-K36 specific) / histone methyltransferase(H3-K4 specific)	Encodes a protein with histone lysine N-methyltransferase activity required specifically for the trimethylation of H3-K4 in FLC chromatin (and not in H3-K36 dimethylation). Acts as an inhibitor of flowering specifically involved in the autonomous promotion pathway. EFS also regulates the expression of genes involved in carotenoid biosynthesis.Modification of histone methylation at the CRTISO locu…	EARLY FLOWERING IN SHORT DAYS (EFS); FUNCTIONS IN: histone methyltransferase activity (H3-K4 specific), histone methyltransferase activity (H3-K36 specific); INVOLVED IN: positive regulation of histone methylation, carotenoid metabolic process, regulation of gene expression, epigenetic, negative regulation of flower development, secondary shoot formation; LOCATED IN: nucleus; EXPRESSED IN: 23 pla…
AT5G38840	Chr5:15551295-15555077	11.9023	8.76881	-0.440788	0.0380883	protein_coding	forkhead-associated domain-containing protein / FHA domain-containing protein		forkhead-associated domain-containing protein / FHA domain-containing protein; FUNCTIONS IN: molecular_function unknown; INVOLVED IN: biological_process unknown; LOCATED IN: membrane; EXPRESSED IN: 23 plant structures; EXPRESSED DURING: 13 growth stages; CONTAINS InterPro DOMAIN/s: SMAD/FHA domain (InterPro:IPR008984), Forkhead-associated (InterPro:IPR000253); BEST Arabidopsis thaliana protein ma…
AT3G21865	Chr3:7701024-7703385	33.2785	24.5025	-0.441663	0.0244538	protein_coding	PEX22 (peroxin 22); protein binding	Interacts with PEX4 in a yeast two-hybrid. The PEX4 and PEX22 pair may be important during the remodeling of peroxisome matrix contents as glyoxysomes transition to leaf peroxisomes.	peroxin 22 (PEX22); FUNCTIONS IN: protein binding; INVOLVED IN: peroxisome organization; LOCATED IN: cellular_component unknown; EXPRESSED IN: 24 plant structures; EXPRESSED DURING: 13 growth stages; Has 58 Blast hits to 58 proteins in 31 species: Archae - 0; Bacteria - 0; Metazoa - 0; Fungi - 0; Plants - 29; Viruses - 0; Other Eukaryotes - 29 (source: NCBI BLink).
AT1G68830	Chr1:25872444-25875550	61.7164	45.4334	-0.441902	0.0113008	protein_coding	STN7 (Stt7 homolog STN7); kinase/ protein kinase	STN7 protein kinase; required for state transitions, phosphorylation of the major antenna complex (LHCII) between PSII and PSI, and light adaptation	Stt7 homolog STN7 (STN7); FUNCTIONS IN: protein kinase activity, kinase activity; INVOLVED IN: regulation of photosynthesis, light reaction, circadian rhythm; LOCATED IN: chloroplast; EXPRESSED IN: 25 plant structures; EXPRESSED DURING: 15 growth stages; CONTAINS InterPro DOMAIN/s: Protein kinase, ATP binding site (InterPro:IPR017441), Protein kinase, core (InterPro:IPR000719), Serine/threonine p…
AT1G04780	Chr1:1340668-1343584	23.0646	16.9555	-0.443929	0.0148049	protein_coding	ankyrin repeat family protein		ankyrin repeat family protein; FUNCTIONS IN: molecular_function unknown; INVOLVED IN: biological_process unknown; LOCATED IN: plasma membrane; EXPRESSED IN: 24 plant structures; EXPRESSED DURING: 13 growth stages; CONTAINS InterPro DOMAIN/s: Ankyrin (InterPro:IPR002110); BEST Arabidopsis thaliana protein match is: ankyrin repeat family protein (TAIR:AT3G24210.1); Has 832 Blast hits to 578 protein…
AT2G39340	Chr2:16423638-16432557	16.1429	11.8523	-0.445729	0.0192807	protein_coding	SAC3/GANP family protein		SAC3/GANP family protein; FUNCTIONS IN: molecular_function unknown; INVOLVED IN: biological_process unknown; LOCATED IN: cellular_component unknown; EXPRESSED IN: 24 plant structures; EXPRESSED DURING: 15 growth stages; CONTAINS InterPro DOMAIN/s: SAC3/GANP/Nin1/mts3/eIF-3 p25 (InterPro:IPR005062); BEST Arabidopsis thaliana protein match is: RNA binding / nucleic acid binding (TAIR:AT1G33680.1); …
AT4G39690	Chr4:18417655-18421971	20.5586	15.0931	-0.445847	0.0184332	protein_coding	unknown protein		unknown protein; FUNCTIONS IN: molecular_function unknown; INVOLVED IN: biological_process unknown; LOCATED IN: mitochondrion; EXPRESSED IN: 26 plant structures; EXPRESSED DURING: 14 growth stages; Has 6265 Blast hits to 4855 proteins in 651 species: Archae - 26; Bacteria - 1226; Metazoa - 2506; Fungi - 658; Plants - 238; Viruses - 35; Other Eukaryotes - 1576 (source: NCBI BLink).
AT5G40670	Chr5:16285710-16287793	50.5348	37.0785	-0.446694	0.0151502	protein_coding	PQ-loop repeat family protein / transmembrane family protein		PQ-loop repeat family protein / transmembrane family protein; FUNCTIONS IN: molecular_function unknown; INVOLVED IN: biological_process unknown; LOCATED IN: plasma membrane, membrane; EXPRESSED IN: 24 plant structures; EXPRESSED DURING: 15 growth stages; CONTAINS InterPro DOMAIN/s: Cystinosin/ERS1p repeat (InterPro:IPR006603), Lysosomal cystine transporter (InterPro:IPR005282); Has 261 Blast hits…
AT2G30530	Chr2:13008915-13011063	17.8631	13.0923	-0.448269	0.0427458	protein_coding	unknown protein		unknown protein; LOCATED IN: cellular_component unknown; EXPRESSED IN: 25 plant structures; EXPRESSED DURING: 15 growth stages; BEST Arabidopsis thaliana protein match is: unknown protein (TAIR:AT5G01970.1); Has 5828 Blast hits to 755 proteins in 128 species: Archae - 0; Bacteria - 29; Metazoa - 881; Fungi - 129; Plants - 81; Viruses - 12; Other Eukaryotes - 4696 (source: NCBI BLink).
AT1G12120	Chr1:4114770-4117594	37.1697	27.21	-0.449991	0.0123535	protein_coding	unknown protein		unknown protein; FUNCTIONS IN: molecular_function unknown; INVOLVED IN: biological_process unknown; LOCATED IN: cellular_component unknown; EXPRESSED IN: 23 plant structures; EXPRESSED DURING: 15 growth stages; CONTAINS InterPro DOMAIN/s: Protein of unknown function DUF863, plant (InterPro:IPR008581); BEST Arabidopsis thaliana protein match is: unknown protein (TAIR:AT1G62530.2); Has 113 Blast hi…
AT1G26170	Chr1:9047432-9054589	10.6725	7.80506	-0.451418	0.0240688	protein_coding	binding / protein transporter		binding / protein transporter; FUNCTIONS IN: protein transporter activity, binding; INVOLVED IN: intracellular protein transport, protein import into nucleus, docking; LOCATED IN: nucleus, nuclear pore, cytoplasm; EXPRESSED IN: 22 plant structures; EXPRESSED DURING: 13 growth stages; CONTAINS InterPro DOMAIN/s: Importin-beta, N-terminal (InterPro:IPR001494), Armadillo-like helical (InterPro:IPR01…
AT1G49560	Chr1:18342553-18344363	21.7094	15.8745	-0.451614	0.0322663	protein_coding	myb family transcription factor		myb family transcription factor; FUNCTIONS IN: transcription factor activity, DNA binding; INVOLVED IN: regulation of transcription; EXPRESSED IN: 20 plant structures; EXPRESSED DURING: 10 growth stages; CONTAINS InterPro DOMAIN/s: Homeodomain-like (InterPro:IPR009057), Myb, DNA-binding (InterPro:IPR014778), Myb-type HTH DNA-binding domain (InterPro:IPR017930), Myb-like DNA-binding region, SHAQKY…
AT2G42230	Chr2:17592037-17596629	17.8944	13.0781	-0.452356	0.0344637	protein_coding	tubulin-specific chaperone C-related		tubulin-specific chaperone C-related; FUNCTIONS IN: binding; INVOLVED IN: biological_process unknown; LOCATED IN: cellular_component unknown; CONTAINS InterPro DOMAIN/s: CARP motif (InterPro:IPR006599), C-CAP/cofactor C-like domain (InterPro:IPR017901), Tubulin binding cofactor C (InterPro:IPR012945); BEST Arabidopsis thaliana protein match is: tubulin-specific chaperone C-related (TAIR:AT3G57890…
AT3G61220	Chr3:22662959-22665597	43.3119	31.6515	-0.45249	0.020403	protein_coding	short-chain dehydrogenase/reductase (SDR) family protein		short-chain dehydrogenase/reductase (SDR) family protein; FUNCTIONS IN: (-)-menthol dehydrogenase activity, oxidoreductase activity, (+)-neomenthol dehydrogenase activity; INVOLVED IN: defense response; LOCATED IN: plasma membrane; EXPRESSED IN: 23 plant structures; EXPRESSED DURING: 13 growth stages; CONTAINS InterPro DOMAIN/s: NAD(P)-binding (InterPro:IPR016040), Glucose/ribitol dehydrogenase (…
AT1G26130	Chr1:9033599-9038246	8.52294	6.22818	-0.452541	0.0302582	protein_coding	haloacid dehalogenase-like hydrolase family protein		haloacid dehalogenase-like hydrolase family protein; FUNCTIONS IN: ATPase activity, coupled to transmembrane movement of ions, phosphorylative mechanism; INVOLVED IN: metabolic process, ATP biosynthetic process, phospholipid transport; LOCATED IN: plasma membrane, chloroplast envelope; EXPRESSED IN: 24 plant structures; EXPRESSED DURING: 15 growth stages; CONTAINS InterPro DOMAIN/s: Haloacid deha…
AT3G27570	Chr3:10213995-10216736	32.6352	23.8427	-0.452882	0.0180323	protein_coding			FUNCTIONS IN: molecular_function unknown; INVOLVED IN: biological_process unknown; LOCATED IN: endomembrane system; EXPRESSED IN: 22 plant structures; EXPRESSED DURING: 13 growth stages; CONTAINS InterPro DOMAIN/s: Thioredoxin fold (InterPro:IPR012335), Sucraseferredoxin-like (InterPro:IPR009737), Thioredoxin-like fold (InterPro:IPR012336); BEST Arabidopsis thaliana protein match is: unknown prot…
AT1G67720	Chr1:25386340-25391073	8.31514	6.07209	-0.453546	0.0357947	protein_coding	leucine-rich repeat family protein / protein kinase family protein		leucine-rich repeat family protein / protein kinase family protein; FUNCTIONS IN: protein binding, protein kinase activity, kinase activity; INVOLVED IN: protein amino acid phosphorylation; LOCATED IN: endomembrane system; EXPRESSED IN: 21 plant structures; EXPRESSED DURING: 13 growth stages; CONTAINS InterPro DOMAIN/s: Protein kinase, ATP binding site (InterPro:IPR017441), Protein kinase, core (…
AT4G05060	Chr4:2589636-2592163	21.3992	15.6237	-0.453817	0.0463141	protein_coding	vesicle-associated membrane family protein / VAMP family protein		vesicle-associated membrane family protein / VAMP family protein; FUNCTIONS IN: structural molecule activity; INVOLVED IN: biological_process unknown; LOCATED IN: chloroplast; EXPRESSED IN: 22 plant structures; EXPRESSED DURING: 13 growth stages; CONTAINS InterPro DOMAIN/s: PapD-like (InterPro:IPR008962), Major sperm protein (InterPro:IPR000535); BEST Arabidopsis thaliana protein match is: vesicl…
AT1G64060	Chr1:23769773-23776931	5.81766	4.24727	-0.453902	0.0440187	protein_coding	ATRBOH F (ARABIDOPSIS THALIANA RESPIRATORY BURST OXIDASE PROTEIN F); NAD(P)H oxidase	Interacts with AtrbohD gene to fine tune the spatial control of ROI production and hypersensitive response to cell in and around infection site.	ARABIDOPSIS THALIANA RESPIRATORY BURST OXIDASE PROTEIN F (ATRBOH F); FUNCTIONS IN: NAD(P)H oxidase activity; INVOLVED IN: in 11 processes; LOCATED IN: plasma membrane, integral to plasma membrane; EXPRESSED IN: 22 plant structures; EXPRESSED DURING: 13 growth stages; CONTAINS InterPro DOMAIN/s: Ferredoxin reductase-type FAD-binding domain (InterPro:IPR017927), Cytochrome b245, heavy chain (InterP…
AT2G39870	Chr2:16643380-16645377	26.81	19.5687	-0.454226	0.0182086	protein_coding	unknown protein		unknown protein; FUNCTIONS IN: molecular_function unknown; INVOLVED IN: biological_process unknown; LOCATED IN: cellular_component unknown; EXPRESSED IN: 22 plant structures; EXPRESSED DURING: 13 growth stages; BEST Arabidopsis thaliana protein match is: unknown protein (TAIR:AT3G55690.1); Has 42 Blast hits to 42 proteins in 11 species: Archae - 0; Bacteria - 0; Metazoa - 2; Fungi - 2; Plants - 3…
AT5G42540	Chr5:17007412-17014801	25.9118	18.9103	-0.454438	0.0103637	protein_coding	XRN2 (EXORIBONUCLEASE 2); 5'-3' exonuclease/ 5'-3' exoribonuclease/ nucleic acid binding	Encodes a protein with similarity to yeast 5'-3'exonucleases and can functionally complement the yeast mutations. In Arabidopsis XRN2 acts as a suppressor of posttranscriptional gene silencing.	EXORIBONUCLEASE 2 (XRN2); FUNCTIONS IN: 5'-3' exoribonuclease activity, 5'-3' exonuclease activity, nucleic acid binding; INVOLVED IN: miRNA catabolic process; LOCATED IN: nucleus; EXPRESSED IN: 21 plant structures; EXPRESSED DURING: 13 growth stages; CONTAINS InterPro DOMAIN/s: 5&apos;-3&apos; exoribonuclease 2 (InterPro:IPR017151), Zinc finger, CCHC-type (InterPro:IPR001878), Putative 5-3 exonu…
AT2G25660	Chr2:10914585-10927390	12.9177	9.42275	-0.455127	0.0260636	protein_coding	emb2410 (embryo defective 2410)		embryo defective 2410 (emb2410); FUNCTIONS IN: molecular_function unknown; INVOLVED IN: embryonic development ending in seed dormancy; EXPRESSED IN: 23 plant structures; EXPRESSED DURING: 13 growth stages; CONTAINS InterPro DOMAIN/s: Protein of unknown function DUF490 (InterPro:IPR007452); Has 317 Blast hits to 261 proteins in 75 species: Archae - 0; Bacteria - 208; Metazoa - 0; Fungi - 0; Plants…
AT1G53800	Chr1:20081698-20084500	54.0656	39.3663	-0.457749	0.036931	protein_coding	endonuclease		endonuclease; FUNCTIONS IN: endonuclease activity; INVOLVED IN: biological_process unknown; LOCATED IN: cellular_component unknown; EXPRESSED IN: 21 plant structures; EXPRESSED DURING: 13 growth stages; CONTAINS InterPro DOMAIN/s: Intron-encoded nuclease 2 (InterPro:IPR003611); BEST Arabidopsis thaliana protein match is: endonuclease (TAIR:AT1G53250.1); Has 1002 Blast hits to 749 proteins in 180 …
AT1G26150	Chr1:9039627-9043288	42.7076	31.0884	-0.458115	0.0086536	protein_coding	PERK10 (PROLINE-RICH EXTENSIN-LIKE RECEPTOR KINASE 10); ATP binding / protein kinase/ protein serine/threonine kinase/ protein tyrosine kinase		PROLINE-RICH EXTENSIN-LIKE RECEPTOR KINASE 10 (PERK10); FUNCTIONS IN: protein serine/threonine kinase activity, protein tyrosine kinase activity, protein kinase activity, ATP binding; INVOLVED IN: protein amino acid phosphorylation; LOCATED IN: plasma membrane; EXPRESSED IN: 22 plant structures; EXPRESSED DURING: 13 growth stages; CONTAINS InterPro DOMAIN/s: Protein kinase, ATP binding site (Inte…
AT5G13740	Chr5:4432305-4436668	50.8712	37.0206	-0.458522	0.00914379	protein_coding	ZIF1 (ZINC INDUCED FACILITATOR 1); carbohydrate transmembrane transporter/ sugar:hydrogen symporter/ tetracycline:hydrogen antiporter		ZINC INDUCED FACILITATOR 1 (ZIF1); FUNCTIONS IN: carbohydrate transmembrane transporter activity, tetracycline:hydrogen antiporter activity, sugar:hydrogen symporter activity; INVOLVED IN: response to nematode; LOCATED IN: integral to membrane, membrane; EXPRESSED IN: 23 plant structures; EXPRESSED DURING: 13 growth stages; CONTAINS InterPro DOMAIN/s: Tetracycline resistance protein, TetA (InterP…
AT1G27290	Chr1:9481531-9482912	49.2499	35.8189	-0.4594	0.0177254	protein_coding	unknown protein		unknown protein; FUNCTIONS IN: molecular_function unknown; INVOLVED IN: biological_process unknown; EXPRESSED IN: 24 plant structures; EXPRESSED DURING: 15 growth stages; Has 25 Blast hits to 25 proteins in 9 species: Archae - 0; Bacteria - 0; Metazoa - 0; Fungi - 0; Plants - 25; Viruses - 0; Other Eukaryotes - 0 (source: NCBI BLink).
AT3G29320	Chr3:11252806-11259053	212.089	154.224	-0.459642	0.0197596	protein_coding	glucan phosphorylase, putative	Encodes a plastidic alpha-glucan phosphorylase. In vitro, the enzyme has a preference for maltooligosaccharides, such as maltoheptaose.	glucan phosphorylase, putative; FUNCTIONS IN: phosphorylase activity, transferase activity, transferring glycosyl groups; INVOLVED IN: response to water deprivation, response to temperature stimulus; LOCATED IN: chloroplast stroma, chloroplast, plastid; EXPRESSED IN: 23 plant structures; EXPRESSED DURING: 13 growth stages; CONTAINS InterPro DOMAIN/s: Glycosyl transferase, family 35 (InterPro:IPR0…
AT4G25660	Chr4:13083406-13085188	23.2516	16.9016	-0.460168	0.0337666	protein_coding	unknown protein		unknown protein; FUNCTIONS IN: molecular_function unknown; INVOLVED IN: biological_process unknown; LOCATED IN: cellular_component unknown; EXPRESSED IN: 22 plant structures; EXPRESSED DURING: 13 growth stages; CONTAINS InterPro DOMAIN/s: Protein of unknown function DUF862, eukaryotic (InterPro:IPR008580); BEST Arabidopsis thaliana protein match is: unknown protein (TAIR:AT4G25680.1); Has 499 Bla…
AT3G17090	Chr3:5826802-5829633	38.155	27.7271	-0.460577	0.0119213	protein_coding	protein phosphatase 2C family protein / PP2C family protein		protein phosphatase 2C family protein / PP2C family protein; FUNCTIONS IN: protein serine/threonine phosphatase activity, catalytic activity; INVOLVED IN: protein amino acid dephosphorylation; LOCATED IN: endomembrane system, protein serine/threonine phosphatase complex; EXPRESSED IN: 24 plant structures; EXPRESSED DURING: 15 growth stages; CONTAINS InterPro DOMAIN/s: Protein phosphatase 2C, mang…
AT3G48710	Chr3:18040936-18044226	16.6014	12.0636	-0.46065	0.0331397	protein_coding			EXPRESSED IN: 22 plant structures; EXPRESSED DURING: 13 growth stages; CONTAINS InterPro DOMAIN/s: DEK, C-terminal (InterPro:IPR014876); BEST Arabidopsis thaliana protein match is: unknown protein (TAIR:AT5G63550.2); Has 48226 Blast hits to 25734 proteins in 1103 species: Archae - 54; Bacteria - 6881; Metazoa - 21026; Fungi - 4604; Plants - 1514; Viruses - 306; Other Eukaryotes - 13841 (source: N…
AT5G62030	Chr5:24918478-24920876	9.56688	6.94947	-0.461146	0.0479309	protein_coding	diphthamide synthesis DPH2 family protein		diphthamide synthesis DPH2 family protein; FUNCTIONS IN: molecular_function unknown; INVOLVED IN: biological_process unknown; LOCATED IN: cellular_component unknown; EXPRESSED IN: 23 plant structures; EXPRESSED DURING: 13 growth stages; CONTAINS InterPro DOMAIN/s: Diphthamide synthesis, DHP1 (InterPro:IPR016435), Diphthamide synthesis, DPH1/DHP2 (InterPro:IPR002728); BEST Arabidopsis thaliana pro…
AT1G56460	Chr1:21146288-21149616	24.665	17.9125	-0.461502	0.0170406	protein_coding	PAPA-1-like family protein / zinc finger (HIT type) family protein		PAPA-1-like family protein / zinc finger (HIT type) family protein; FUNCTIONS IN: protein binding; LOCATED IN: chloroplast; CONTAINS InterPro DOMAIN/s: Zinc finger, HIT-type (InterPro:IPR007529), PAPA-1-like conserved region (InterPro:IPR006880); BEST Arabidopsis thaliana protein match is: PAPA-1-like family protein / zinc finger (HIT type) family protein (TAIR:AT2G47350.1); Has 6344 Blast hits t…
AT3G02740	Chr3:590447-593186	20.9499	15.2113	-0.461799	0.023082	protein_coding	aspartyl protease family protein		aspartyl protease family protein; FUNCTIONS IN: aspartic-type endopeptidase activity; INVOLVED IN: proteolysis; LOCATED IN: plasma membrane, anchored to membrane; EXPRESSED IN: 22 plant structures; EXPRESSED DURING: 13 growth stages; CONTAINS InterPro DOMAIN/s: Peptidase aspartic, catalytic (InterPro:IPR009007), Peptidase A1 (InterPro:IPR001461), Peptidase aspartic, active site (InterPro:IPR00196…
AT2G20960	Chr2:9006647-9009763	37.0285	26.855	-0.463445	0.00873996	protein_coding	pEARLI4		pEARLI4; FUNCTIONS IN: molecular_function unknown; INVOLVED IN: biological_process unknown; LOCATED IN: cellular_component unknown; EXPRESSED IN: 22 plant structures; EXPRESSED DURING: 13 growth stages; CONTAINS InterPro DOMAIN/s: Phospholipase-like, arabidopsis (InterPro:IPR007942); BEST Arabidopsis thaliana protein match is: unknown protein (TAIR:AT4G38560.1); Has 13761 Blast hits to 8502 prote…
AT1G13245	Chr1:4525485-4526064	54.9182	39.8295	-0.463448	0.0414872	protein_coding	RTFL17 (ROTUNDIFOLIA LIKE 17)		ROTUNDIFOLIA LIKE 17 (RTFL17); FUNCTIONS IN: molecular_function unknown; INVOLVED IN: shoot development; EXPRESSED IN: stem, flower, root, leaf; CONTAINS InterPro DOMAIN/s: DVL (InterPro:IPR012552); BEST Arabidopsis thaliana protein match is: RTFL15 (ROTUNDIFOLIA LIKE 15) (TAIR:AT1G68825.2); Has 68 Blast hits to 68 proteins in 7 species: Archae - 0; Bacteria - 0; Metazoa - 0; Fungi - 0; Plants - …
AT5G47020	Chr5:19082004-19090023	22.1186	16.02	-0.465389	0.00763475	protein_coding	glycine-rich protein		glycine-rich protein; FUNCTIONS IN: molecular_function unknown; INVOLVED IN: biological_process unknown; LOCATED IN: endomembrane system; EXPRESSED IN: 23 plant structures; EXPRESSED DURING: 13 growth stages; BEST Arabidopsis thaliana protein match is: glycine-rich protein (TAIR:AT5G11700.2); Has 13676 Blast hits to 3712 proteins in 430 species: Archae - 4; Bacteria - 9087; Metazoa - 1586; Fungi …
AT2G25170	Chr2:10712605-10723986	26.0549	18.8695	-0.465497	0.00771162	protein_coding	PKL (PICKLE); ATPase/ DNA binding / DNA helicase	Encodes a SWI/SWF nuclear-localized chromatin remodeling factor of the CHD3 group. Involved in post-germination repression of embryonic development. Acts with GA to establish repression of embryonic genes upon germination. Protein preferentially accumulates in differentiating tissues. Loss of function alleles are associated with expression of embryonic traits in adult plants and derepression of e…	PICKLE (PKL); FUNCTIONS IN: DNA helicase activity, ATPase activity, DNA binding; INVOLVED IN: in 8 processes; LOCATED IN: nucleus; EXPRESSED IN: 25 plant structures; EXPRESSED DURING: 13 growth stages; CONTAINS InterPro DOMAIN/s: Protein of unknown function DUF1087 (InterPro:IPR009463), Zinc finger, RING-type, conserved site (InterPro:IPR017907), Zinc finger, RING-type (InterPro:IPR001841), Zinc …
AT5G24430	Chr5:8339143-8343102	10.3605	7.50111	-0.465919	0.0393113	protein_coding	calcium-dependent protein kinase, putative / CDPK, putative		calcium-dependent protein kinase, putative / CDPK, putative; FUNCTIONS IN: in 6 functions; INVOLVED IN: N-terminal protein myristoylation; LOCATED IN: plasma membrane; EXPRESSED IN: 23 plant structures; EXPRESSED DURING: 13 growth stages; CONTAINS InterPro DOMAIN/s: Protein kinase, ATP binding site (InterPro:IPR017441), Protein kinase, core (InterPro:IPR000719), Serine/threonine protein kinase (I…
AT5G28919	Chr5:10940032-10943378	30.6122	22.1595	-0.46618	0.0134793	protein_coding			FUNCTIONS IN: molecular_function unknown; INVOLVED IN: biological_process unknown; LOCATED IN: cellular_component unknown; BEST Arabidopsis thaliana protein match is: Expressed protein (TAIR:AT3G01345.1); Has 4 Blast hits to 4 proteins in 1 species: Archae - 0; Bacteria - 0; Metazoa - 0; Fungi - 0; Plants - 4; Viruses - 0; Other Eukaryotes - 0 (source: NCBI BLink).
AT4G11100	Chr4:6768613-6770184	47.2122	34.1706	-0.466404	0.0147198	protein_coding	unknown protein		unknown protein; FUNCTIONS IN: molecular_function unknown; INVOLVED IN: biological_process unknown; LOCATED IN: cellular_component unknown; EXPRESSED IN: 21 plant structures; EXPRESSED DURING: 13 growth stages; BEST Arabidopsis thaliana protein match is: unknown protein (TAIR:AT5G03060.1); Has 5100 Blast hits to 3995 proteins in 395 species: Archae - 54; Bacteria - 465; Metazoa - 1838; Fungi - 35…
AT5G16120	Chr5:5265632-5267979	23.9196	17.3023	-0.467227	0.0274248	protein_coding	hydrolase, alpha/beta fold family protein		hydrolase, alpha/beta fold family protein; FUNCTIONS IN: hydrolase activity; EXPRESSED IN: 23 plant structures; EXPRESSED DURING: 15 growth stages; CONTAINS InterPro DOMAIN/s: Alpha/beta hydrolase fold-1 (InterPro:IPR000073); BEST Arabidopsis thaliana protein match is: hydrolase, alpha/beta fold family protein (TAIR:AT1G77420.1); Has 3060 Blast hits to 3056 proteins in 812 species: Archae - 20; B…
AT3G06290	Chr3:1899041-1907297	7.54719	5.45686	-0.467867	0.0167204	protein_coding			FUNCTIONS IN: molecular_function unknown; INVOLVED IN: biological_process unknown; LOCATED IN: cellular_component unknown; EXPRESSED IN: 24 plant structures; EXPRESSED DURING: 15 growth stages; CONTAINS InterPro DOMAIN/s: SAC3/GANP/Nin1/mts3/eIF-3 p25 (InterPro:IPR005062); BEST Arabidopsis thaliana protein match is: SAC3/GANP family protein (TAIR:AT3G54380.1); Has 1341 Blast hits to 841 proteins …
AT2G03390	Chr2:1030401-1032625	61.3044	44.3251	-0.467868	0.00853839	protein_coding	uvrB/uvrC motif-containing protein		uvrB/uvrC motif-containing protein; FUNCTIONS IN: DNA binding, nuclease activity; INVOLVED IN: nucleotide-excision repair; LOCATED IN: chloroplast; EXPRESSED IN: 25 plant structures; EXPRESSED DURING: 15 growth stages; CONTAINS InterPro DOMAIN/s: Hemimethylated DNA-binding region (InterPro:IPR011722), UvrB/UvrC protein (InterPro:IPR001943); Has 1297 Blast hits to 1297 proteins in 161 species: Arc…
AT2G29560	Chr2:12646559-12651703	22.6187	16.344	-0.468752	0.0379352	protein_coding	enolase, putative		enolase, putative; FUNCTIONS IN: phosphopyruvate hydratase activity; INVOLVED IN: glycolysis; LOCATED IN: phosphopyruvate hydratase complex; EXPRESSED IN: 25 plant structures; EXPRESSED DURING: 14 growth stages; CONTAINS InterPro DOMAIN/s: Enolase (InterPro:IPR000941); BEST Arabidopsis thaliana protein match is: LOS2; copper ion binding / phosphopyruvate hydratase (TAIR:AT2G36530.1); Has 9375 Bla…
AT1G03590	Chr1:894253-896440	12.2158	8.80915	-0.471676	0.0411685	protein_coding	catalytic/ protein serine/threonine phosphatase		catalytic/ protein serine/threonine phosphatase; FUNCTIONS IN: protein serine/threonine phosphatase activity, catalytic activity; INVOLVED IN: N-terminal protein myristoylation; LOCATED IN: plasma membrane; EXPRESSED IN: 23 plant structures; EXPRESSED DURING: 13 growth stages; CONTAINS InterPro DOMAIN/s: Protein phosphatase 2C-related (InterPro:IPR001932), Protein phosphatase 2C (InterPro:IPR0156…
AT1G20090	Chr1:6966921-6968933	53.2503	38.383	-0.472322	0.0102776	protein_coding	ROP2 (RHO-RELATED PROTEIN FROM PLANTS 2); GTP binding	Member of the Rho GTPase family. Functions to organize the microtubular cytoskeleton in combination with RIC1 and RIC4. These interactions affect pavement cell morphogenesis and pollen tube growth. ROP2 expression is stimulated by brassinosteroid treatment. Inhibit light-induced stomatal opening.	RHO-RELATED PROTEIN FROM PLANTS 2 (ROP2); FUNCTIONS IN: GTP binding; INVOLVED IN: cell morphogenesis, response to light stimulus, pollen tube growth, regulation of stomatal movement, microtubule cytoskeleton organization; LOCATED IN: nucleolus, plasma membrane, nucleus, cytoplasm; EXPRESSED IN: 26 plant structures; EXPRESSED DURING: 13 growth stages; CONTAINS InterPro DOMAIN/s: Ras GTPase (InterP…
AT1G14910	Chr1:5139711-5143689	25.1528	18.1022	-0.474554	0.00930885	protein_coding	epsin N-terminal homology (ENTH) domain-containing protein		epsin N-terminal homology (ENTH) domain-containing protein; FUNCTIONS IN: phospholipid binding, clathrin binding, binding, phosphatidylinositol binding; INVOLVED IN: N-terminal protein myristoylation, clathrin coat assembly; LOCATED IN: clathrin coat, mitochondrion; EXPRESSED IN: 23 plant structures; EXPRESSED DURING: 14 growth stages; CONTAINS InterPro DOMAIN/s: Epsin-like, N-terminal (InterPro:…
AT1G20440	Chr1:7084408-7085772	443.703	318.998	-0.476048	0.0112889	protein_coding	COR47 (COLD-REGULATED 47)	Belongs to the dehydrin protein family, which contains highly conserved stretches of 7-17 residues that are repetitively scattered in their sequences, the K-, S-, Y- and lysine rich segments. Cold regulated gene, amino acid sequence homology with Group II LEA (late embryogenesis abundant) proteins. Also responds to osmotic stress, ABA, dehydration and inhibits e.coli growth while overexpressed. C…	COLD-REGULATED 47 (COR47); FUNCTIONS IN: molecular_function unknown; INVOLVED IN: in 8 processes; LOCATED IN: cellular_component unknown; EXPRESSED IN: 23 plant structures; EXPRESSED DURING: 13 growth stages; CONTAINS InterPro DOMAIN/s: Dehydrin (InterPro:IPR000167); BEST Arabidopsis thaliana protein match is: ERD10 (EARLY RESPONSIVE TO DEHYDRATION 10); actin binding (TAIR:AT1G20450.2); Has 13535…
AT3G05880	Chr3:1755496-1756540	615.965	442.639	-0.476718	0.00591793	protein_coding	RCI2A (RARE-COLD-INDUCIBLE 2A)	Induced by low temperatures, dehydration and salt stress and ABA. Encodes a small (54 amino acids), highly hydrophobic protein that bears two potential transmembrane domains.	RARE-COLD-INDUCIBLE 2A (RCI2A); FUNCTIONS IN: molecular_function unknown; INVOLVED IN: hyperosmotic salinity response, response to cold, response to abscisic acid stimulus; LOCATED IN: integral to membrane; EXPRESSED IN: 24 plant structures; EXPRESSED DURING: 13 growth stages; CONTAINS InterPro DOMAIN/s: Uncharacterised protein family UPF0057 (InterPro:IPR000612); BEST Arabidopsis thaliana protei…
AT2G33770	Chr2:14277557-14283040	31.5792	22.6878	-0.477059	0.00582481	protein_coding	PHO2 (PHOSPHATE 2); ubiquitin-protein ligase	Encodes a ubiquitin-conjugating E2 enzyme. UBC24 mRNA accumulation is suppressed by miR399f, miR399b and miR399c. Involved in phosphate starvation response.	PHOSPHATE 2 (PHO2); FUNCTIONS IN: ubiquitin-protein ligase activity; INVOLVED IN: cellular response to phosphate starvation, phosphate transport, phosphate ion homeostasis; LOCATED IN: cellular_component unknown; EXPRESSED IN: vascular tissue; CONTAINS InterPro DOMAIN/s: Ubiquitin-conjugating enzyme/RWD-like (InterPro:IPR016135), Ubiquitin-conjugating enzyme, E2 (InterPro:IPR000608); BEST Arabido…
AT2G48060	Chr2:19651195-19662617	10.4844	7.53099	-0.477329	0.00652971	protein_coding	unknown protein		unknown protein; FUNCTIONS IN: molecular_function unknown; INVOLVED IN: biological_process unknown; LOCATED IN: endomembrane system; EXPRESSED IN: shoot, sperm cell; Has 17 Blast hits to 17 proteins in 8 species: Archae - 0; Bacteria - 4; Metazoa - 0; Fungi - 0; Plants - 12; Viruses - 0; Other Eukaryotes - 1 (source: NCBI BLink).
AT2G47730	Chr2:19556325-19559463	119.805	86.0155	-0.478025	0.00583719	protein_coding	ATGSTF8 (ARABIDOPSIS THALIANA GLUTATHIONE S-TRANSFERASE PHI 8); glutathione binding / glutathione transferase	Encodes glutathione transferase belonging to the phi class of GSTs. Naming convention according to Wagner et al. (2002).	ARABIDOPSIS THALIANA GLUTATHIONE S-TRANSFERASE PHI 8 (ATGSTF8); FUNCTIONS IN: glutathione transferase activity, glutathione binding; INVOLVED IN: in 7 processes; LOCATED IN: in 7 components; EXPRESSED IN: 25 plant structures; EXPRESSED DURING: 16 growth stages; CONTAINS InterPro DOMAIN/s: Thioredoxin fold (InterPro:IPR012335), Glutathione S-transferase, C-terminal (InterPro:IPR004046), Glutathion…
AT4G32180	Chr4:15535472-15543904	27.4201	19.6664	-0.479503	0.0488784	protein_coding	ATPANK2 (PANTOTHENATE KINASE 2); pantothenate kinase	Encodes a protein with pantothenate kinase activity.	PANTOTHENATE KINASE 2 (ATPANK2); FUNCTIONS IN: pantothenate kinase activity; INVOLVED IN: coenzyme A biosynthetic process; EXPRESSED IN: 23 plant structures; EXPRESSED DURING: 14 growth stages; CONTAINS InterPro DOMAIN/s: Fumble (InterPro:IPR011602), Domain of unknown function DUF89 (InterPro:IPR002791), Pantothenate kinase, acetyl-CoA regulated, two-domain type (InterPro:IPR015844), Eukaryotic p…
AT4G20300	Chr4:10955158-10959213	18.5463	13.2935	-0.480408	0.0245519	protein_coding	unknown protein		unknown protein; FUNCTIONS IN: molecular_function unknown; INVOLVED IN: biological_process unknown; EXPRESSED IN: 24 plant structures; EXPRESSED DURING: 15 growth stages; CONTAINS InterPro DOMAIN/s: Protein of unknown function DUF1639 (InterPro:IPR012438); BEST Arabidopsis thaliana protein match is: unknown protein (TAIR:AT1G55340.2); Has 446 Blast hits to 432 proteins in 73 species: Archae - 0; …
AT3G47500	Chr3:17503999-17506058	27.8102	19.9324	-0.4805	0.0116248	protein_coding	CDF3 (CYCLING DOF FACTOR 3); DNA binding / protein binding / transcription factor	Dof-type zinc finger domain-containing protein, identical to H-protein promoter binding factor-2a GI:3386546 from (Arabidopsis thaliana). Interacts with LKP2 and FKF1, but its overexpression does not change flowering time under short or long day conditions.	CYCLING DOF FACTOR 3 (CDF3); FUNCTIONS IN: protein binding, transcription factor activity, DNA binding; INVOLVED IN: regulation of timing of transition from vegetative to reproductive phase, regulation of transcription; EXPRESSED IN: 24 plant structures; EXPRESSED DURING: 13 growth stages; CONTAINS InterPro DOMAIN/s: Zinc finger, Dof-type (InterPro:IPR003851); BEST Arabidopsis thaliana protein ma…
AT1G47550	Chr1:17457170-17463896	19.888	14.2394	-0.482015	0.00933422	protein_coding	unknown protein		unknown protein; INVOLVED IN: biological_process unknown; LOCATED IN: plasma membrane, exocyst; EXPRESSED IN: male gametophyte, cultured cell, pollen tube; EXPRESSED DURING: L mature pollen stage, M germinated pollen stage; BEST Arabidopsis thaliana protein match is: unknown protein (TAIR:AT1G47560.1); Has 295 Blast hits to 291 proteins in 116 species: Archae - 3; Bacteria - 6; Metazoa - 134; Fun…
AT2G45200	Chr2:18637502-18639808	30.2065	21.6209	-0.482435	0.022165	protein_coding	GOS12 (GOLGI SNARE 12); SNARE binding	Encodes a member of the GOS1 (Golgi SNARE) gene family.	GOLGI SNARE 12 (GOS12); FUNCTIONS IN: SNARE binding; INVOLVED IN: membrane fusion, intra-Golgi vesicle-mediated transport; LOCATED IN: cytosol, integral to membrane, vacuole; EXPRESSED IN: 25 plant structures; EXPRESSED DURING: 15 growth stages; CONTAINS InterPro DOMAIN/s: Vesicle transport v-SNARE (InterPro:IPR007705); BEST Arabidopsis thaliana protein match is: GOS11 (golgi snare 11); SNARE bin…
AT1G18650	Chr1:6418857-6420557	32.5288	23.2705	-0.483216	0.0299749	protein_coding	PDCB3 (PLASMODESMATA CALLOSE-BINDING PROTEIN 3); callose binding / polysaccharide binding	Encodes a member of the X8-GPI family of proteins. It localizes to the plasmodesmata and is predicted to bind callose.	PLASMODESMATA CALLOSE-BINDING PROTEIN 3 (PDCB3); FUNCTIONS IN: callose binding, polysaccharide binding; INVOLVED IN: biological_process unknown; LOCATED IN: plasmodesma, anchored to membrane; EXPRESSED IN: 24 plant structures; EXPRESSED DURING: 13 growth stages; CONTAINS InterPro DOMAIN/s: X8 (InterPro:IPR012946); BEST Arabidopsis thaliana protein match is: E13L3 (GLUCAN ENDO-1,3-BETA-GLUCOSIDASE…
AT1G60860	Chr1:22401243-22407777	7.21412	5.15791	-0.484036	0.0491415	protein_coding	AGD2 (ARF-GAP DOMAIN 2); ARF GTPase activator/ protein binding / zinc ion binding	A member of ARF GAP domain (AGD), A thaliana has 15 members, grouped into four classes. AGD2 belongs to the class 1, together with AGD1, AGD3, and AGD4.	ARF-GAP DOMAIN 2 (AGD2); FUNCTIONS IN: protein binding, ARF GTPase activator activity, zinc ion binding; INVOLVED IN: regulation of ARF GTPase activity; LOCATED IN: cytoplasm; EXPRESSED IN: 22 plant structures; EXPRESSED DURING: 15 growth stages; CONTAINS InterPro DOMAIN/s: Arf GTPase activating protein (InterPro:IPR001164), Pleckstrin homology-type (InterPro:IPR011993), BAR (InterPro:IPR004148),…
AT3G10300	Chr3:3186320-3188301	37.6454	26.9117	-0.484238	0.0259449	protein_coding	calcium-binding EF hand family protein		calcium-binding EF hand family protein; FUNCTIONS IN: calcium ion binding; INVOLVED IN: biological_process unknown; LOCATED IN: cellular_component unknown; EXPRESSED IN: 22 plant structures; EXPRESSED DURING: 14 growth stages; CONTAINS InterPro DOMAIN/s: EF-HAND 1 (InterPro:IPR018247), EF-HAND 2 (InterPro:IPR018249), EF-Hand type (InterPro:IPR011992), EF hand (InterPro:IPR018248); BEST Arabidopsi…
AT3G54010	Chr3:20000860-20005183	24.7689	17.7065	-0.484253	0.0125714	protein_coding	PAS1 (PASTICCINO 1); FK506 binding / binding / peptidyl-prolyl cis-trans isomerase	Immunophilin-like protein similar to the p59 FK506-binding protein (FKBP52). Shows rotamase activity and contains an FKBP-like domain and three tetratricopeptide repeat units. Members of this class of mutation show ectopic cell proliferation in cotyledons. Gene may be alternatively spliced.	PASTICCINO 1 (PAS1); FUNCTIONS IN: FK506 binding, peptidyl-prolyl cis-trans isomerase activity, binding; INVOLVED IN: embryonic development, cell differentiation, root development, response to cytokinin stimulus, unidimensional cell growth; LOCATED IN: nucleus; EXPRESSED IN: 22 plant structures; EXPRESSED DURING: 13 growth stages; CONTAINS InterPro DOMAIN/s: Tetratricopeptide TPR-1 (InterPro:IPR0…
AT5G16150	Chr5:5272556-5276606	108.317	77.371	-0.4854	0.0223217	protein_coding	PGLCT (PLASTIDIC GLC TRANSLOCATOR); carbohydrate transmembrane transporter/ sugar:hydrogen symporter	Encodes a putative plastidic glucose transporter.	PLASTIDIC GLC TRANSLOCATOR (PGLCT); FUNCTIONS IN: carbohydrate transmembrane transporter activity, sugar:hydrogen symporter activity; INVOLVED IN: response to trehalose stimulus; LOCATED IN: membrane, chloroplast envelope; EXPRESSED IN: 24 plant structures; EXPRESSED DURING: 14 growth stages; CONTAINS InterPro DOMAIN/s: Sugar transporter, conserved site (InterPro:IPR005829), General substrate tra…
AT5G28290	Chr5:10278690-10282614	10.2306	7.3063	-0.485683	0.0340025	protein_coding	ATNEK3 (NIMA-RELATED KINASE3); ATP binding / kinase/ protein kinase/ protein serine/threonine kinase	Encodes AtNek3, a member of the NIMA-related serine/threonine kinases (Neks) that have been linked to cell-cycle regulation in fungi and mammals. Plant Neks might be involved in plant development processes.	NIMA-RELATED KINASE3 (ATNEK3); FUNCTIONS IN: protein serine/threonine kinase activity, protein kinase activity, kinase activity, ATP binding; INVOLVED IN: protein amino acid phosphorylation; LOCATED IN: cellular_component unknown; EXPRESSED IN: 16 plant structures; EXPRESSED DURING: 11 growth stages; CONTAINS InterPro DOMAIN/s: Protein kinase, ATP binding site (InterPro:IPR017441), Protein kinase…
AT3G17770	Chr3:6081670-6086138	29.0296	20.7221	-0.486354	0.00719367	protein_coding	dihydroxyacetone kinase family protein		dihydroxyacetone kinase family protein; FUNCTIONS IN: glycerone kinase activity, ATP binding; INVOLVED IN: glycerol metabolic process; LOCATED IN: cellular_component unknown; EXPRESSED IN: 24 plant structures; EXPRESSED DURING: 15 growth stages; CONTAINS InterPro DOMAIN/s: Dak phosphatase (InterPro:IPR004007), Dihydroxyacetone kinase (InterPro:IPR012734), Dak kinase (InterPro:IPR004006); BEST Ara…
AT2G23940	Chr2:10183965-10186605	26.0978	18.6171	-0.4873	0.0333678	protein_coding	unknown protein		unknown protein; LOCATED IN: plasma membrane; EXPRESSED IN: 22 plant structures; EXPRESSED DURING: 13 growth stages; CONTAINS InterPro DOMAIN/s: Protein of unknown function DUF788 (InterPro:IPR008506); BEST Arabidopsis thaliana protein match is: unknown protein (TAIR:AT4G30500.1); Has 231 Blast hits to 231 proteins in 115 species: Archae - 0; Bacteria - 0; Metazoa - 101; Fungi - 70; Plants - 27; …
AT2G14255	Chr2:6036973-6040978	16.5992	11.8321	-0.488405	0.0230317	protein_coding	zinc ion binding		zinc ion binding; FUNCTIONS IN: zinc ion binding; INVOLVED IN: biological_process unknown; LOCATED IN: membrane; CONTAINS InterPro DOMAIN/s: Zinc finger, DHHC-type (InterPro:IPR001594), Ankyrin (InterPro:IPR002110); BEST Arabidopsis thaliana protein match is: TIP1 (TIP GROWTH DEFECTIVE 1); S-acyltransferase/ acyl binding (TAIR:AT5G20350.1); Has 68318 Blast hits to 26989 proteins in 883 species: A…
AT1G59820	Chr1:22011327-22020294	11.22	7.99365	-0.489147	0.00931106	protein_coding	ALA3 (Aminophospholipid ATPase3); ATPase, coupled to transmembrane movement of ions, phosphorylative mechanism / phospholipid transporter	Encodes a phospholipid translocase. Involved in secretory vesicle formation from trans-Golgi in peripheral columella cells at the root tip. Mutants have short primary roots and grow slower.	Aminophospholipid ATPase3 (ALA3); FUNCTIONS IN: phospholipid transporter activity, ATPase activity, coupled to transmembrane movement of ions, phosphorylative mechanism; INVOLVED IN: Golgi vesicle budding, shoot development, root development; LOCATED IN: Golgi apparatus, plasma membrane; EXPRESSED IN: 25 plant structures; EXPRESSED DURING: 15 growth stages; CONTAINS InterPro DOMAIN/s: ATPase, P-t…
AT2G24160	Chr2:10268007-10270612	10.3209	7.35014	-0.489723	0.0229863	pseudogene			pseudogene, leucine rich repeat protein family, contains leucine rich-repeat domains Pfam:PF00560, INTERPRO:IPR001611; contains some similarity to Cf-4 (Lycopersicon hirsutum) gi|2808683|emb|CAA05268; blastp match of 37% identity and 8.4e-98 P-value to GP|2808683|emb|CAA05268.1||AJ002235 Cf-4 {Lycopersicon hirsutum}
AT3G23900	Chr3:8631605-8636045	16.0616	11.4276	-0.491088	0.0208903	protein_coding	RNA recognition motif (RRM)-containing protein		RNA recognition motif (RRM)-containing protein; FUNCTIONS IN: nucleotide binding, nucleic acid binding; INVOLVED IN: biological_process unknown; LOCATED IN: cellular_component unknown; EXPRESSED IN: 24 plant structures; EXPRESSED DURING: 14 growth stages; CONTAINS InterPro DOMAIN/s: Filamin/ABP280 repeat (InterPro:IPR001298), Immunoglobulin-like fold (InterPro:IPR013783), RNA recognition motif, R…
AT3G55020	Chr3:20388868-20394911	27.457	19.533	-0.491257	0.00545322	protein_coding	RabGAP/TBC domain-containing protein		RabGAP/TBC domain-containing protein; FUNCTIONS IN: RAB GTPase activator activity; INVOLVED IN: regulation of Rab GTPase activity; LOCATED IN: cytosol; EXPRESSED IN: 25 plant structures; EXPRESSED DURING: 13 growth stages; CONTAINS InterPro DOMAIN/s: RabGAP/TBC (InterPro:IPR000195); BEST Arabidopsis thaliana protein match is: RAB GTPase activator (TAIR:AT2G39280.1); Has 6656 Blast hits to 6055 pr…
AT5G41810	Chr5:16738061-16739663	17.3674	12.3413	-0.49289	0.0368074	protein_coding	unknown protein		unknown protein; FUNCTIONS IN: molecular_function unknown; INVOLVED IN: biological_process unknown; LOCATED IN: cellular_component unknown; EXPRESSED IN: 22 plant structures; EXPRESSED DURING: 13 growth stages; BEST Arabidopsis thaliana protein match is: unknown protein (TAIR:AT1G64340.1); Has 862 Blast hits to 673 proteins in 114 species: Archae - 0; Bacteria - 35; Metazoa - 196; Fungi - 97; Pla…
AT3G02200	Chr3:406593-409163	56.5759	40.1791	-0.493742	0.00503521	protein_coding	proteasome family protein		proteasome family protein; FUNCTIONS IN: molecular_function unknown; EXPRESSED IN: 22 plant structures; EXPRESSED DURING: 13 growth stages; CONTAINS InterPro DOMAIN/s: Proteasome component region PCI (InterPro:IPR000717); BEST Arabidopsis thaliana protein match is: proteasome family protein (TAIR:AT5G15610.1); Has 274 Blast hits to 274 proteins in 117 species: Archae - 0; Bacteria - 2; Metazoa - …
AT1G35340	Chr1:12977764-12979910	62.0168	44.0316	-0.49412	0.019709	protein_coding	ATP-dependent protease La (LON) domain-containing protein		ATP-dependent protease La (LON) domain-containing protein; FUNCTIONS IN: ATP-dependent peptidase activity; INVOLVED IN: ATP-dependent proteolysis; LOCATED IN: chloroplast; EXPRESSED IN: 22 plant structures; EXPRESSED DURING: 14 growth stages; CONTAINS InterPro DOMAIN/s: Peptidase S16, lon N-terminal (InterPro:IPR003111); Has 156 Blast hits to 156 proteins in 51 species: Archae - 0; Bacteria - 65;…
AT3G62410	Chr3:23090943-23091566	588.492	417.791	-0.494239	0.00461334	protein_coding	CP12-2; protein binding	CP12-2 encodes a small peptide found in the chloroplast stroma. It belongs to the CP12 gene family thought to be involved in the formation of a supramolecular complex with glyceraldehyde-3-phosphate dehydrogenase (GAPDH) and phosphoribulokinase (PRK) embedded in the Calvin cycle. CP12-2 is coordinately regulated by light with the photosynthetic GAPDH and PRK. The annotation of this gene is based …	CP12-2; FUNCTIONS IN: protein binding; INVOLVED IN: response to light stimulus, reductive pentose-phosphate cycle, response to sucrose stimulus, peptide cross-linking via L-cystine; LOCATED IN: chloroplast stroma, chloroplast; EXPRESSED IN: 21 plant structures; EXPRESSED DURING: 13 growth stages; CONTAINS InterPro DOMAIN/s: Protein of unknown function CP12 (InterPro:IPR003823); BEST Arabidopsis t…
AT4G01960	Chr4:851209-853165	21.4675	15.2045	-0.497651	0.0267125	protein_coding	unknown protein		unknown protein; FUNCTIONS IN: molecular_function unknown; INVOLVED IN: biological_process unknown; LOCATED IN: cellular_component unknown; EXPRESSED IN: 24 plant structures; EXPRESSED DURING: 15 growth stages; BEST Arabidopsis thaliana protein match is: unknown protein (TAIR:AT1G02380.1); Has 32 Blast hits to 32 proteins in 6 species: Archae - 0; Bacteria - 0; Metazoa - 0; Fungi - 0; Plants - 32…
AT1G16240	Chr1:5555006-5556841	56.2869	39.8506	-0.498196	0.00765666	protein_coding	SYP51 (SYNTAXIN OF PLANTS 51); SNAP receptor	Encodes one of 24 Arabidopsis syntaxins. Its mRNA has been shown to be expressed.	SYNTAXIN OF PLANTS 51 (SYP51); FUNCTIONS IN: SNAP receptor activity; INVOLVED IN: vesicle-mediated transport; LOCATED IN: endosome membrane, vacuole; EXPRESSED IN: 24 plant structures; EXPRESSED DURING: 15 growth stages; CONTAINS InterPro DOMAIN/s: Target SNARE coiled-coil region (InterPro:IPR000727), Syntaxin/epimorphin, conserved site (InterPro:IPR006012); BEST Arabidopsis thaliana protein matc…
AT1G08820	Chr1:2821551-2825275	27.1423	19.1995	-0.499474	0.00878782	protein_coding	VAP27-2 (VAMP/SYNAPTOBREVIN-ASSOCIATED PROTEIN 27-2); structural molecule	Encodes VAP33-like protein that interacts with cowpea mosaic virus protein 60K. Is a SNARE-like protein that may be involved in vesicular transport to or from the ER.	VAMP/SYNAPTOBREVIN-ASSOCIATED PROTEIN 27-2 (VAP27-2); FUNCTIONS IN: structural molecule activity; INVOLVED IN: intracellular transport; LOCATED IN: plasma membrane, endoplasmic reticulum membrane; EXPRESSED IN: cultured cell; CONTAINS InterPro DOMAIN/s: PapD-like (InterPro:IPR008962), Major sperm protein (InterPro:IPR000535); BEST Arabidopsis thaliana protein match is: VAP (VESICLE ASSOCIATED PRO…
AT5G44800	Chr5:18083418-18093452	11.5482	8.16313	-0.500477	0.00453057	protein_coding	CHR4 (CHROMATIN REMODELING 4); ATP binding / DNA binding / chromatin binding / helicase/ nucleic acid binding / protein binding / zinc ion binding		CHROMATIN REMODELING 4 (CHR4); FUNCTIONS IN: in 7 functions; INVOLVED IN: chromatin assembly or disassembly, regulation of transcription; LOCATED IN: chromatin, nucleus; EXPRESSED IN: 24 plant structures; EXPRESSED DURING: 11 growth stages; CONTAINS InterPro DOMAIN/s: Zinc finger, PHD-type (InterPro:IPR001965), Chromo domain (InterPro:IPR000953), SNF2-related (InterPro:IPR000330), Zinc finger, RI…
AT1G60995	Chr1:22465639-22470716	14.8445	10.4733	-0.50321	0.0143913	protein_coding	unknown protein		unknown protein; FUNCTIONS IN: molecular_function unknown; INVOLVED IN: biological_process unknown; LOCATED IN: cellular_component unknown; EXPRESSED IN: 20 plant structures; EXPRESSED DURING: 10 growth stages; Has 127 Blast hits to 125 proteins in 53 species: Archae - 0; Bacteria - 0; Metazoa - 97; Fungi - 0; Plants - 19; Viruses - 0; Other Eukaryotes - 11 (source: NCBI BLink).
AT5G38880	Chr5:15563305-15569194	12.9874	9.16252	-0.503294	0.00949072	protein_coding	unknown protein		unknown protein; FUNCTIONS IN: molecular_function unknown; INVOLVED IN: biological_process unknown; LOCATED IN: cellular_component unknown; EXPRESSED IN: 22 plant structures; EXPRESSED DURING: 13 growth stages; Has 379 Blast hits to 327 proteins in 103 species: Archae - 4; Bacteria - 53; Metazoa - 188; Fungi - 37; Plants - 26; Viruses - 0; Other Eukaryotes - 71 (source: NCBI BLink).
AT1G30910	Chr1:11000882-11002936	27.583	19.457	-0.503488	0.0179463	protein_coding	molybdenum cofactor sulfurase family protein		molybdenum cofactor sulfurase family protein; FUNCTIONS IN: molybdenum ion binding, Mo-molybdopterin cofactor sulfurase activity, pyridoxal phosphate binding, catalytic activity; INVOLVED IN: biological_process unknown; LOCATED IN: chloroplast; EXPRESSED IN: 22 plant structures; EXPRESSED DURING: 13 growth stages; CONTAINS InterPro DOMAIN/s: Pyruvate kinase, beta-barrel-like (InterPro:IPR011037),…
AT4G15410	Chr4:8814800-8816805	13.8877	9.79267	-0.504035	0.0312358	protein_coding	PUX5 (Arabidopsis thaliana serine/threonine protein phosphatase 2A 55 kDa regulatory subunit B prime gamma); protein binding		Arabidopsis thaliana serine/threonine protein phosphatase 2A 55 kDa regulatory subunit B prime gamma (PUX5); FUNCTIONS IN: protein binding; INVOLVED IN: biological_process unknown; LOCATED IN: cellular_component unknown; EXPRESSED IN: 25 plant structures; EXPRESSED DURING: 14 growth stages; CONTAINS InterPro DOMAIN/s: Ubiquitin-associated/translation elongation factor EF1B, N-terminal, eukaryote …
AT1G51950	Chr1:19305314-19307510	23.4424	16.5112	-0.505677	0.0123148	protein_coding	IAA18 (INDOLE-3-ACETIC ACID INDUCIBLE 18); transcription factor		INDOLE-3-ACETIC ACID INDUCIBLE 18 (IAA18); FUNCTIONS IN: transcription factor activity; INVOLVED IN: response to auxin stimulus; LOCATED IN: nucleus; EXPRESSED IN: 22 plant structures; EXPRESSED DURING: 13 growth stages; CONTAINS InterPro DOMAIN/s: Aux/IAA-ARF-dimerisation (InterPro:IPR011525), AUX/IAA protein (InterPro:IPR003311); BEST Arabidopsis thaliana protein match is: PAP1 (PHYTOCHROME-ASS…
AT4G26640	Chr4:13437070-13440835	22.0044	15.4741	-0.507933	0.0126256	protein_coding	WRKY20; transcription factor	member of WRKY Transcription Factor; Group I	WRKY20; FUNCTIONS IN: transcription factor activity; INVOLVED IN: regulation of transcription, DNA-dependent; LOCATED IN: nucleus; EXPRESSED IN: 22 plant structures; EXPRESSED DURING: 13 growth stages; CONTAINS InterPro DOMAIN/s: DNA-binding WRKY (InterPro:IPR003657); BEST Arabidopsis thaliana protein match is: WRKY3; transcription factor (TAIR:AT2G03340.1); Has 3302 Blast hits to 1755 proteins i…
AT1G53400	Chr1:19924751-19931494	44.9367	31.5977	-0.508073	0.0138824	protein_coding	unknown protein		unknown protein; INVOLVED IN: N-terminal protein myristoylation; LOCATED IN: cellular_component unknown; EXPRESSED IN: 24 plant structures; EXPRESSED DURING: 15 growth stages; BEST Arabidopsis thaliana protein match is: unknown protein (TAIR:AT5G45740.1); Has 229 Blast hits to 229 proteins in 79 species: Archae - 0; Bacteria - 0; Metazoa - 121; Fungi - 40; Plants - 47; Viruses - 0; Other Eukaryot…
AT2G46260	Chr2:18995967-18998633	17.4006	12.2297	-0.508746	0.0116924	protein_coding	BTB/POZ domain-containing protein		BTB/POZ domain-containing protein; FUNCTIONS IN: protein binding; INVOLVED IN: biological_process unknown; LOCATED IN: cellular_component unknown; EXPRESSED IN: 24 plant structures; EXPRESSED DURING: 15 growth stages; CONTAINS InterPro DOMAIN/s: BTB/POZ (InterPro:IPR013069), BTB/POZ fold (InterPro:IPR011333), Kelch related (InterPro:IPR013089), BTB/POZ-like (InterPro:IPR000210); BEST Arabidopsis …
AT2G26830	Chr2:11443560-11447171	13.1463	9.23902	-0.508845	0.0422404	protein_coding	emb1187 (embryo defective 1187); kinase/ phosphotransferase, alcohol group as acceptor		embryo defective 1187 (emb1187); FUNCTIONS IN: phosphotransferase activity, alcohol group as acceptor, kinase activity; INVOLVED IN: embryonic development ending in seed dormancy; LOCATED IN: cellular_component unknown; EXPRESSED IN: 24 plant structures; EXPRESSED DURING: 15 growth stages; CONTAINS InterPro DOMAIN/s: Choline/ethanolamine kinase (InterPro:IPR002573), Protein kinase-like (InterPro:…
AT1G16560	Chr1:5668383-5673600	45.2195	31.7289	-0.511146	0.0440196	protein_coding	Per1-like family protein		Per1-like family protein; FUNCTIONS IN: molecular_function unknown; INVOLVED IN: biological_process unknown; LOCATED IN: endomembrane system; EXPRESSED IN: 22 plant structures; EXPRESSED DURING: 13 growth stages; CONTAINS InterPro DOMAIN/s: Per1-like (InterPro:IPR007217); BEST Arabidopsis thaliana protein match is: Per1-like protein-related (TAIR:AT5G62130.1); Has 248 Blast hits to 238 proteins i…
AT5G59210	Chr5:23890605-23893665	20.2398	14.1915	-0.512169	0.0467127	protein_coding	myosin heavy chain-related		myosin heavy chain-related; INVOLVED IN: biological_process unknown; EXPRESSED IN: 23 plant structures; EXPRESSED DURING: 15 growth stages; BEST Arabidopsis thaliana protein match is: unknown protein (TAIR:AT1G05320.3); Has 52386 Blast hits to 29309 proteins in 1451 species: Archae - 516; Bacteria - 4841; Metazoa - 28674; Fungi - 3719; Plants - 1637; Viruses - 146; Other Eukaryotes - 12853 (sourc…
AT1G69850	Chr1:26296675-26300472	15.5069	10.8694	-0.512644	0.0122919	protein_coding	ATNRT1:2 (ARABIDOPSIS THALIANA NITRATE TRANSPORTER 1:2); calcium ion binding / transporter	Encodes an inducible component of low-affinity nitrate uptake. mRNA found primarily in root hairs and the epidermis of roots.	ARABIDOPSIS THALIANA NITRATE TRANSPORTER 1:2 (ATNRT1:2); FUNCTIONS IN: transporter activity, calcium ion binding; INVOLVED IN: response to nematode; LOCATED IN: plasma membrane, membrane; EXPRESSED IN: 22 plant structures; EXPRESSED DURING: 13 growth stages; CONTAINS InterPro DOMAIN/s: TGF-beta receptor, type I/II extracellular region (InterPro:IPR000109), Major facilitator superfamily, general s…
AT2G24420	Chr2:10380025-10383405	66.1276	46.3256	-0.513443	0.0235766	protein_coding	DNA repair ATPase-related		DNA repair ATPase-related; LOCATED IN: endoplasmic reticulum, plasma membrane; EXPRESSED IN: 27 plant structures; EXPRESSED DURING: 15 growth stages; BEST Arabidopsis thaliana protein match is: myosin heavy chain-related (TAIR:AT4G31340.1); Has 40459 Blast hits to 22195 proteins in 1227 species: Archae - 603; Bacteria - 4138; Metazoa - 19968; Fungi - 2677; Plants - 1225; Viruses - 186; Other Euka…
AT2G46560	Chr2:19115370-19125856	13.188	9.23843	-0.513502	0.00311483	protein_coding	transducin family protein / WD-40 repeat family protein		transducin family protein / WD-40 repeat family protein; FUNCTIONS IN: nucleotide binding; LOCATED IN: CUL4 RING ubiquitin ligase complex; EXPRESSED IN: 22 plant structures; EXPRESSED DURING: 13 growth stages; CONTAINS InterPro DOMAIN/s: WD40 repeat-like (InterPro:IPR011046), WD40 repeat, region (InterPro:IPR017986), WD40/YVTN repeat-like (InterPro:IPR015943), WD40 repeat (InterPro:IPR001680); Ha…
AT1G63900	Chr1:23716718-23719301	19.33	13.5398	-0.513628	0.0143578	protein_coding	zinc finger (C3HC4-type RING finger) family protein		zinc finger (C3HC4-type RING finger) family protein; FUNCTIONS IN: protein binding, zinc ion binding; EXPRESSED IN: 22 plant structures; EXPRESSED DURING: 13 growth stages; CONTAINS InterPro DOMAIN/s: Zinc finger, RING-type (InterPro:IPR001841); BEST Arabidopsis thaliana protein match is: ZCF61; protein binding / zinc ion binding (TAIR:AT1G59560.1); Has 2665 Blast hits to 2573 proteins in 206 spe…
AT3G21430	Chr3:7544627-7553579	7.90674	5.53797	-0.513726	0.0136743	protein_coding	DNA binding		DNA binding; FUNCTIONS IN: DNA binding; INVOLVED IN: biological_process unknown; LOCATED IN: cellular_component unknown; EXPRESSED IN: 23 plant structures; EXPRESSED DURING: 13 growth stages; CONTAINS InterPro DOMAIN/s: SANT, DNA-binding (InterPro:IPR001005), Homeodomain-like (InterPro:IPR009057), Myb, DNA-binding (InterPro:IPR014778), DIRP (InterPro:IPR010561); BEST Arabidopsis thaliana protein …
AT3G15920	Chr3:5383595-5387009	13.7253	9.61306	-0.513773	0.0108544	protein_coding	phox (PX) domain-containing protein		phox (PX) domain-containing protein; FUNCTIONS IN: phosphoinositide binding; INVOLVED IN: signal transduction, intracellular signaling cascade; CONTAINS InterPro DOMAIN/s: Phox-like (InterPro:IPR001683); BEST Arabidopsis thaliana protein match is: phox (PX) domain-containing protein (TAIR:AT4G32160.1); Has 32140 Blast hits to 19498 proteins in 1025 species: Archae - 337; Bacteria - 2422; Metazoa …
AT3G06130	Chr3:1852888-1855061	16.3773	11.4421	-0.517343	0.0131818	protein_coding	heavy-metal-associated domain-containing protein		heavy-metal-associated domain-containing protein; FUNCTIONS IN: metal ion binding; INVOLVED IN: metal ion transport; LOCATED IN: cell wall; EXPRESSED IN: 21 plant structures; EXPRESSED DURING: 13 growth stages; CONTAINS InterPro DOMAIN/s: Heavy metal transport/detoxification protein (InterPro:IPR006121); BEST Arabidopsis thaliana protein match is: heavy-metal-associated domain-containing protein …
AT4G14200	Chr4:8185369-8188783	6.23461	4.35502	-0.517621	0.0411685	protein_coding	unknown protein		unknown protein; INVOLVED IN: biological_process unknown; EXPRESSED IN: 19 plant structures; EXPRESSED DURING: 8 growth stages; Has 1311 Blast hits to 831 proteins in 209 species: Archae - 4; Bacteria - 342; Metazoa - 470; Fungi - 179; Plants - 56; Viruses - 0; Other Eukaryotes - 260 (source: NCBI BLink).
AT2G46550	Chr2:19111988-19114173	56.6294	39.5567	-0.517632	0.00296962	protein_coding	unknown protein		unknown protein; FUNCTIONS IN: molecular_function unknown; INVOLVED IN: biological_process unknown; EXPRESSED IN: 23 plant structures; EXPRESSED DURING: 13 growth stages; BEST Arabidopsis thaliana protein match is: unknown protein (TAIR:AT1G01240.3); Has 47 Blast hits to 43 proteins in 8 species: Archae - 0; Bacteria - 0; Metazoa - 1; Fungi - 0; Plants - 46; Viruses - 0; Other Eukaryotes - 0 (sou…
AT1G59750	Chr1:21979383-21984433	29.9694	20.8955	-0.520298	0.0297164	protein_coding	ARF1 (AUXIN RESPONSE FACTOR 1); DNA binding / transcription factor	Encodes a member of the auxin response factor family. ARFs bind to the cis element 5'-TGTCTC-3' ARFs mediate changes in gene expression in response to auxin. ARF's form heterodimers with IAA/AUX genes. ARF1 enhances mutant phenotypes of ARF2 and may act with ARF2 to control aspects of maturation and senescence.ARF1:LUC and 3xHA:ARF1 proteins have a half-life of ~3-4 hours and their degradation is…	AUXIN RESPONSE FACTOR 1 (ARF1); FUNCTIONS IN: transcription factor activity, DNA binding; INVOLVED IN: leaf senescence, response to auxin stimulus, negative regulation of transcription, regulation of transcription, DNA-dependent; LOCATED IN: nucleus; EXPRESSED IN: 21 plant structures; EXPRESSED DURING: 13 growth stages; CONTAINS InterPro DOMAIN/s: Aux/IAA-ARF-dimerisation (InterPro:IPR011525), Tr…
AT1G68790	Chr1:25834708-25839319	18.5721	12.9367	-0.52167	0.00524789	protein_coding	LINC3 (LITTLE NUCLEI3)		LITTLE NUCLEI3 (LINC3); INVOLVED IN: biological_process unknown; LOCATED IN: nucleolus; EXPRESSED IN: 23 plant structures; EXPRESSED DURING: 13 growth stages; BEST Arabidopsis thaliana protein match is: LINC2 (LITTLE NUCLEI2) (TAIR:AT1G13220.2); Has 250284 Blast hits to 107694 proteins in 2507 species: Archae - 2115; Bacteria - 37052; Metazoa - 113182; Fungi - 17848; Plants - 9025; Viruses - 1093…
AT1G67500	Chr1:25287706-25296714	3.51083	2.44378	-0.522695	0.0243976	protein_coding	ATREV3 (ARABIDOPSIS THALIANA RECOVERY PROTEIN 3); DNA binding / DNA-directed DNA polymerase	Encodes the catalytic subunit of DNA polymerase zeta.Mutants are sensitive to UV-B radiation. Gene is involved in damage-tolerance mechanisms through translesion synthesis(TLS).	ARABIDOPSIS THALIANA RECOVERY PROTEIN 3 (ATREV3); FUNCTIONS IN: DNA-directed DNA polymerase activity, DNA binding; INVOLVED IN: response to UV, DNA repair, response to UV-B; LOCATED IN: zeta DNA polymerase complex; EXPRESSED IN: 19 plant structures; EXPRESSED DURING: 8 growth stages; CONTAINS InterPro DOMAIN/s: DNA-directed DNA polymerase, family B, conserved region2 (InterPro:IPR017966), Polynuc…
AT5G62720	Chr5:25191841-25195009	173.827	120.954	-0.523197	0.00285973	protein_coding	integral membrane HPP family protein		integral membrane HPP family protein; FUNCTIONS IN: molecular_function unknown; INVOLVED IN: biological_process unknown; LOCATED IN: integral to membrane, chloroplast inner membrane, chloroplast envelope; EXPRESSED IN: 22 plant structures; EXPRESSED DURING: 13 growth stages; CONTAINS InterPro DOMAIN/s: HPP (InterPro:IPR007065); BEST Arabidopsis thaliana protein match is: integral membrane HPP fam…
AT1G79990	Chr1:30084113-30092238	48.5469	33.7645	-0.523871	0.0395359	protein_coding	protein binding / structural molecule		protein binding / structural molecule; FUNCTIONS IN: protein binding, structural molecule activity; INVOLVED IN: intracellular protein transport, vesicle-mediated transport; LOCATED IN: membrane coat, endomembrane system, COPI vesicle coat; EXPRESSED IN: 25 plant structures; EXPRESSED DURING: 15 growth stages; CONTAINS InterPro DOMAIN/s: WD40 repeat-like (InterPro:IPR011046), Coatomer, WD associa…
AT1G74520	Chr1:28007973-28009300	71.9028	49.8866	-0.527393	0.00498476	protein_coding	ATHVA22A	Part of the AtHVA22a family. Protein expression is ABA- and stress-inducible.	ATHVA22A; FUNCTIONS IN: molecular_function unknown; INVOLVED IN: response to water deprivation, hyperosmotic salinity response, response to cold, response to abscisic acid stimulus; LOCATED IN: endomembrane system; EXPRESSED IN: 23 plant structures; EXPRESSED DURING: 13 growth stages; CONTAINS InterPro DOMAIN/s: TB2/DP1 and HVA22 related protein (InterPro:IPR004345); BEST Arabidopsis thaliana pro…
AT3G52290	Chr3:19393818-19396403	12.9542	8.98108	-0.528457	0.0180237	protein_coding	IQD3 (IQ-domain 3); calmodulin binding		IQ-domain 3 (IQD3); FUNCTIONS IN: calmodulin binding; INVOLVED IN: biological_process unknown; LOCATED IN: plasma membrane; EXPRESSED IN: 23 plant structures; EXPRESSED DURING: 13 growth stages; CONTAINS InterPro DOMAIN/s: IQ calmodulin-binding region (InterPro:IPR000048); BEST Arabidopsis thaliana protein match is: iqd2 (IQ-domain 2); calmodulin binding (TAIR:AT5G03040.2); Has 440 Blast hits to …
AT4G33010	Chr4:15926669-15931332	346.794	240.383	-0.528743	0.0140745	protein_coding	AtGLDP1 (Arabidopsis thaliana glycine decarboxylase P-protein 1); catalytic/ glycine dehydrogenase (decarboxylating)/ pyridoxal phosphate binding		Arabidopsis thaliana glycine decarboxylase P-protein 1 (AtGLDP1); FUNCTIONS IN: glycine dehydrogenase (decarboxylating) activity, pyridoxal phosphate binding, catalytic activity; INVOLVED IN: glycine catabolic process, glycine decarboxylation via glycine cleavage system; LOCATED IN: mitochondrion, apoplast, glycine cleavage complex, chloroplast, chloroplast envelope; EXPRESSED IN: 31 plant struct…
AT5G02970	Chr5:694968-697637	16.6186	11.513	-0.529525	0.00922769	protein_coding	hydrolase, alpha/beta fold family protein		hydrolase, alpha/beta fold family protein; FUNCTIONS IN: catalytic activity; INVOLVED IN: biological_process unknown; LOCATED IN: cellular_component unknown; CONTAINS InterPro DOMAIN/s: Alpha/beta hydrolase fold-1 (InterPro:IPR000073); BEST Arabidopsis thaliana protein match is: hydrolase, alpha/beta fold family protein (TAIR:AT3G09690.2); Has 537 Blast hits to 531 proteins in 131 species: Archae…
AT3G07360	Chr3:2354718-2356854	34.3276	23.7785	-0.529714	0.0093917	protein_coding	PUB9 (PLANT U-BOX 9); ubiquitin-protein ligase	Encodes a protein containing a U-box and an ARM domain. This protein has E3 ubiquitin ligase activity based on in vitro assays.	PLANT U-BOX 9 (PUB9); FUNCTIONS IN: ubiquitin-protein ligase activity; INVOLVED IN: protein ubiquitination; LOCATED IN: nucleus; EXPRESSED IN: 23 plant structures; EXPRESSED DURING: 13 growth stages; CONTAINS InterPro DOMAIN/s: U box (InterPro:IPR003613), Armadillo-like helical (InterPro:IPR011989), Zinc finger, RING/FYVE/PHD-type (InterPro:IPR013083), Armadillo (InterPro:IPR000225), Armadillo-ty…
AT3G55080	Chr3:20411398-20415934	11.7267	8.11049	-0.531939	0.0319164	protein_coding	SET domain-containing protein		SET domain-containing protein; FUNCTIONS IN: molecular_function unknown; INVOLVED IN: biological_process unknown; LOCATED IN: cellular_component unknown; EXPRESSED IN: 22 plant structures; EXPRESSED DURING: 13 growth stages; CONTAINS InterPro DOMAIN/s: SET (InterPro:IPR001214); BEST Arabidopsis thaliana protein match is: SET domain-containing protein (TAIR:AT3G07670.1); Has 740 Blast hits to 740 …
AT3G47640	Chr3:17567596-17569315	20.7965	14.3786	-0.532415	0.0241627	protein_coding	basic helix-loop-helix (bHLH) family protein		basic helix-loop-helix (bHLH) family protein; FUNCTIONS IN: transcription factor activity, DNA binding; INVOLVED IN: regulation of transcription; LOCATED IN: nucleus, chloroplast; EXPRESSED IN: 22 plant structures; EXPRESSED DURING: 13 growth stages; CONTAINS InterPro DOMAIN/s: Basic helix-loop-helix dimerisation region bHLH (InterPro:IPR001092), Helix-loop-helix DNA-binding (InterPro:IPR011598);…
AT3G14172	Chr3:4698562-4705609	13.0754	9.03386	-0.533439	0.00400383	protein_coding			FUNCTIONS IN: molecular_function unknown; INVOLVED IN: biological_process unknown; LOCATED IN: cellular_component unknown; BEST Arabidopsis thaliana protein match is: COP1-interacting protein-related (TAIR:AT1G72410.1); Has 2665 Blast hits to 1956 proteins in 215 species: Archae - 2; Bacteria - 189; Metazoa - 878; Fungi - 141; Plants - 132; Viruses - 5; Other Eukaryotes - 1318 (source: NCBI BLink…
AT1G73720	Chr1:27725001-27729931	15.4269	10.6543	-0.534004	0.0126531	protein_coding	transducin family protein / WD-40 repeat family protein		transducin family protein / WD-40 repeat family protein; FUNCTIONS IN: nucleotide binding; INVOLVED IN: biological_process unknown; LOCATED IN: CUL4 RING ubiquitin ligase complex; EXPRESSED IN: 23 plant structures; EXPRESSED DURING: 13 growth stages; CONTAINS InterPro DOMAIN/s: WD40 repeat-like (InterPro:IPR011046), WD40 repeat, region (InterPro:IPR017986), WD40/YVTN repeat-like (InterPro:IPR0159…
AT1G49720	Chr1:18400091-18405681	35.1259	24.2408	-0.5351	0.0210679	protein_coding	ABF1 (ABSCISIC ACID RESPONSIVE ELEMENT-BINDING FACTOR 1); DNA binding / protein binding / transcription activator/ transcription factor	Identified as a protein that binds to abscisic acid response elements. May mediate transcriptional regulation of ABA responses.	ABSCISIC ACID RESPONSIVE ELEMENT-BINDING FACTOR 1 (ABF1); FUNCTIONS IN: protein binding, transcription factor activity, transcription activator activity, DNA binding; INVOLVED IN: abscisic acid mediated signaling, regulation of transcription, DNA-dependent, response to stress; LOCATED IN: nucleus; EXPRESSED IN: 23 plant structures; EXPRESSED DURING: 12 growth stages; CONTAINS InterPro DOMAIN/s: B…
AT3G13810	Chr3:4544489-4547410	12.2779	8.46757	-0.536048	0.0136307	protein_coding	AtIDD11 (Arabidopsis thaliana Indeterminate(ID)-Domain 11); nucleic acid binding / transcription factor/ zinc ion binding		Arabidopsis thaliana Indeterminate(ID)-Domain 11 (AtIDD11); FUNCTIONS IN: transcription factor activity, zinc ion binding, nucleic acid binding; INVOLVED IN: regulation of transcription; LOCATED IN: intracellular; EXPRESSED IN: 20 plant structures; EXPRESSED DURING: 9 growth stages; CONTAINS InterPro DOMAIN/s: Zinc finger, C2H2-like (InterPro:IPR015880), Zinc finger, C2H2-type (InterPro:IPR007087…
AT1G52340	Chr1:19488942-19491648	17.7151	12.2133	-0.536533	0.0257203	protein_coding	ABA2 (ABA DEFICIENT 2); alcohol dehydrogenase/ oxidoreductase/ xanthoxin dehydrogenase	Encodes a cytosolic short-chain dehydrogenase/reductase involved in the conversion of xanthoxin to ABA-aldehyde during ABA biosynthesis. Mutants are insensitive to sucrose and glucose.	ABA DEFICIENT 2 (ABA2); FUNCTIONS IN: alcohol dehydrogenase activity, oxidoreductase activity, xanthoxin dehydrogenase activity; INVOLVED IN: in 6 processes; LOCATED IN: cytosol; EXPRESSED IN: 24 plant structures; EXPRESSED DURING: 13 growth stages; CONTAINS InterPro DOMAIN/s: NAD(P)-binding (InterPro:IPR016040), Glucose/ribitol dehydrogenase (InterPro:IPR002347), Short-chain dehydrogenase/reduct…
AT4G34760	Chr4:16582182-16582879	68.8772	47.467	-0.5371	0.00647068	protein_coding	auxin-responsive family protein		auxin-responsive family protein; FUNCTIONS IN: molecular_function unknown; INVOLVED IN: response to auxin stimulus; LOCATED IN: cellular_component unknown; EXPRESSED IN: 22 plant structures; EXPRESSED DURING: 13 growth stages; CONTAINS InterPro DOMAIN/s: Auxin responsive SAUR protein (InterPro:IPR003676); BEST Arabidopsis thaliana protein match is: auxin-responsive protein, putative (TAIR:AT2G165…
AT5G24450	Chr5:8348241-8353303	23.9844	16.5231	-0.537611	0.0042977	protein_coding	unknown protein		unknown protein; FUNCTIONS IN: molecular_function unknown; INVOLVED IN: biological_process unknown; LOCATED IN: cellular_component unknown; EXPRESSED IN: 22 plant structures; EXPRESSED DURING: 13 growth stages; BEST Arabidopsis thaliana protein match is: unknown protein (TAIR:AT3G49410.1); Has 598 Blast hits to 569 proteins in 160 species: Archae - 0; Bacteria - 19; Metazoa - 191; Fungi - 117; Pl…
AT5G47820	Chr5:19366482-19372789	26.719	18.3992	-0.538222	0.0156956	protein_coding	FRA1 (FRAGILE FIBER 1); microtubule motor	encodes a kinesin-like protein with an N-terminal microtubule binding motor domain. Protein is localized to the periphery of the cytoplasm and mutants in the gene exhibit altered orientation of cellulose microfibrils and reduced mechanical strength of fibers.	FRAGILE FIBER 1 (FRA1); FUNCTIONS IN: microtubule motor activity; INVOLVED IN: cellulose microfibril organization; LOCATED IN: cytoplasm; EXPRESSED IN: 22 plant structures; EXPRESSED DURING: 13 growth stages; CONTAINS InterPro DOMAIN/s: Kinesin, motor region (InterPro:IPR001752); BEST Arabidopsis thaliana protein match is: KICP-02; ATP binding / microtubule motor (TAIR:AT3G50240.1); Has 43951 Bla…
AT4G01450	Chr4:608453-610724	9.85893	6.78767	-0.538514	0.0486508	protein_coding	nodulin MtN21 family protein		nodulin MtN21 family protein; LOCATED IN: endomembrane system, membrane; EXPRESSED IN: 21 plant structures; EXPRESSED DURING: 11 growth stages; CONTAINS InterPro DOMAIN/s: Protein of unknown function DUF6, transmembrane (InterPro:IPR000620); BEST Arabidopsis thaliana protein match is: nodulin MtN21 family protein (TAIR:AT4G01440.1); Has 1053 Blast hits to 1041 proteins in 150 species: Archae - 0;…
AT5G16990	Chr5:5581657-5584029	21.0661	14.4962	-0.539251	0.0114303	protein_coding	NADP-dependent oxidoreductase, putative	molecular function has not been defined, was shown involved in oxidative stress tolerance.	NADP-dependent oxidoreductase, putative; FUNCTIONS IN: oxidoreductase activity, binding, zinc ion binding, catalytic activity; INVOLVED IN: response to oxidative stress; LOCATED IN: plasma membrane; EXPRESSED IN: 26 plant structures; EXPRESSED DURING: 13 growth stages; CONTAINS InterPro DOMAIN/s: GroES-like (InterPro:IPR011032), NAD(P)-binding (InterPro:IPR016040), Alcohol dehydrogenase, zinc-bin…
AT2G42840	Chr2:17826115-17827536	133.722	91.9603	-0.540152	0.00156848	protein_coding	PDF1 (PROTODERMAL FACTOR 1)	Encodes a putative extracellular proline-rich protein is exclusively expressed in the L1 layer of vegetative, inflorescence and floral meristems and the protoderm of organ primordia.	PROTODERMAL FACTOR 1 (PDF1); LOCATED IN: extracellular region; EXPRESSED IN: 20 plant structures; EXPRESSED DURING: 11 growth stages; Has 65132 Blast hits to 29965 proteins in 1274 species: Archae - 149; Bacteria - 9495; Metazoa - 25543; Fungi - 9346; Plants - 9124; Viruses - 2263; Other Eukaryotes - 9212 (source: NCBI BLink).
AT5G40740	Chr5:16301913-16306413	8.40085	5.77313	-0.541182	0.0178011	protein_coding	unknown protein		unknown protein; INVOLVED IN: biological_process unknown; EXPRESSED IN: 20 plant structures; EXPRESSED DURING: 9 growth stages; Has 600 Blast hits to 190 proteins in 71 species: Archae - 0; Bacteria - 216; Metazoa - 38; Fungi - 50; Plants - 20; Viruses - 0; Other Eukaryotes - 276 (source: NCBI BLink).
AT1G07720	Chr1:2390654-2392453	33.4046	22.9406	-0.542144	0.00293186	protein_coding	KCS3 (3-KETOACYL-COA SYNTHASE 3); acyltransferase/ catalytic/ transferase, transferring acyl groups other than amino-acyl groups	Encodes KCS3, a member of the 3-ketoacyl-CoA synthase family involved in the biosynthesis of VLCFA (very long chain fatty acids).	3-KETOACYL-COA SYNTHASE 3 (KCS3); FUNCTIONS IN: transferase activity, transferring acyl groups other than amino-acyl groups, catalytic activity, acyltransferase activity; INVOLVED IN: response to light stimulus, response to cold, response to osmotic stress; LOCATED IN: endoplasmic reticulum; EXPRESSED IN: 24 plant structures; EXPRESSED DURING: 13 growth stages; CONTAINS InterPro DOMAIN/s: Thiolas…
AT3G26700	Chr3:9809949-9812664	8.29464	5.6921	-0.543218	0.0318773	protein_coding	protein kinase family protein		protein kinase family protein; FUNCTIONS IN: protein serine/threonine kinase activity, protein tyrosine kinase activity, protein kinase activity, kinase activity, ATP binding; INVOLVED IN: protein amino acid phosphorylation; LOCATED IN: plasma membrane; EXPRESSED IN: 22 plant structures; EXPRESSED DURING: 13 growth stages; CONTAINS InterPro DOMAIN/s: Protein kinase, ATP binding site (InterPro:IPR…
AT1G17440	Chr1:5982266-5987784	26.9728	18.5063	-0.543491	0.0192006	protein_coding	EER4 (ENHANCED ETHYLENE RESPONSE 4); DNA binding / transcription initiation factor	Encodes one of two Arabidopsis proteins with similarity to the TBP-associated factor TAF12. The gene product is an EIN3-interacting TFIID transcription factor required for proper ethylene response, including ERF1 induction. Loss of function mutants show enhanced response to ethylene. Located in nucleus and expressed throughout the plant. Required for ERF1 expression.	ENHANCED ETHYLENE RESPONSE 4 (EER4); FUNCTIONS IN: transcription initiation factor activity, DNA binding; INVOLVED IN: regulation of ethylene mediated signaling pathway, jasmonic acid mediated signaling pathway, transcription initiation; LOCATED IN: nucleus, transcription factor TFIID complex; EXPRESSED IN: 24 plant structures; EXPRESSED DURING: 13 growth stages; CONTAINS InterPro DOMAIN/s: Trans…
AT1G68530	Chr1:25712587-25714807	200.152	137.027	-0.54664	0.00222573	protein_coding	KCS6 (3-KETOACYL-COA SYNTHASE 6); catalytic/ transferase, transferring acyl groups other than amino-acyl groups	Encodes KCS6, a member of the 3-ketoacyl-CoA synthase family involved in the biosynthesis of VLCFA (very long chain fatty acids).	3-KETOACYL-COA SYNTHASE 6 (KCS6); FUNCTIONS IN: transferase activity, transferring acyl groups other than amino-acyl groups, catalytic activity; INVOLVED IN: in 7 processes; LOCATED IN: endoplasmic reticulum; EXPRESSED IN: 29 plant structures; EXPRESSED DURING: 13 growth stages; CONTAINS InterPro DOMAIN/s: Thiolase-like (InterPro:IPR016039), 3-Oxoacyl-[acyl-carrier-protein (ACP)] synthase III C-t…
AT1G21730	Chr1:7630106-7636594	9.45668	6.47336	-0.546819	0.00784266	protein_coding	kinesin-related protein (MKRP1)		kinesin-related protein (MKRP1); FUNCTIONS IN: microtubule motor activity, ATP binding; INVOLVED IN: microtubule-based movement; LOCATED IN: plasma membrane; EXPRESSED IN: 9 plant structures; EXPRESSED DURING: F mature embryo stage, petal differentiation and expansion stage, D bilateral stage, E expanded cotyledon stage; CONTAINS InterPro DOMAIN/s: Kinesin, motor region (InterPro:IPR001752); BEST…
AT2G38440	Chr2:16095328-16101221	19.935	13.6368	-0.547799	0.00148059	protein_coding	SCAR2 (SCAR HOMOLOG 2)	Encodes a subunit of the WAVE complex. The WAVE complex is required for activation of ARP2/3 complex which functions in actin microfilament nucleation and branching. Mutations cause defects in both the actin and microtubule cytoskeletons that result in aberrant epidermal cell expansion. itb1 mutants showed irregularities in trichome branch positioning and expansion. The SHD domain of this protein…	SCAR HOMOLOG 2 (SCAR2); FUNCTIONS IN: molecular_function unknown; INVOLVED IN: in 6 processes; LOCATED IN: SCAR complex, plasma membrane, cytoplasm; EXPRESSED IN: 26 plant structures; EXPRESSED DURING: 13 growth stages; CONTAINS InterPro DOMAIN/s: Actin-binding WH2 (InterPro:IPR003124); BEST Arabidopsis thaliana protein match is: ATSCAR4 (TAIR:AT5G01730.1); Has 4658 Blast hits to 1965 proteins in…
AT4G29020	Chr4:14304920-14305721	73.5349	50.2607	-0.548998	0.00339067	protein_coding	glycine-rich protein		glycine-rich protein; FUNCTIONS IN: molecular_function unknown; INVOLVED IN: biological_process unknown; LOCATED IN: endomembrane system; EXPRESSED IN: 22 plant structures; EXPRESSED DURING: 13 growth stages; Has 83971 Blast hits to 21200 proteins in 1263 species: Archae - 175; Bacteria - 30874; Metazoa - 25594; Fungi - 4634; Plants - 7115; Viruses - 1037; Other Eukaryotes - 14542 (source: NCBI B…
AT2G35110	Chr2:14795714-14803937	12.5401	8.56873	-0.549397	0.00236195	protein_coding	GRL (GNARLED); transcription activator	Component of the WAVE protein complex which act as activators of ARP2/3 complex involved in actin nucleation. Required for trichome morphogenesis. Mutant displays distorted trichomes, a phenotype that can be phenocopied by treatment of WT plants with actin-interacting drugs.	GNARLED (GRL); FUNCTIONS IN: transcription activator activity; INVOLVED IN: actin nucleation, multidimensional cell growth, actin filament organization, trichome morphogenesis; LOCATED IN: SCAR complex; EXPRESSED IN: 23 plant structures; EXPRESSED DURING: 13 growth stages; Has 2741 Blast hits to 668 proteins in 113 species: Archae - 0; Bacteria - 46; Metazoa - 830; Fungi - 114; Plants - 23; Virus…
AT3G53620	Chr3:19880503-19883672	22.1803	15.1144	-0.553358	0.0100541	protein_coding	AtPPa4 (Arabidopsis thaliana pyrophosphorylase 4); inorganic diphosphatase	Encodes a soluble protein with inorganic pyrophosphatase activity that is highly specific for Mg-inorganic pyrophosphate.	Arabidopsis thaliana pyrophosphorylase 4 (AtPPa4); FUNCTIONS IN: inorganic diphosphatase activity; INVOLVED IN: response to cadmium ion, metabolic process; LOCATED IN: membrane, cytoplasm; EXPRESSED IN: 24 plant structures; EXPRESSED DURING: 13 growth stages; CONTAINS InterPro DOMAIN/s: Inorganic pyrophosphatase (InterPro:IPR008162); BEST Arabidopsis thaliana protein match is: AtPPa1 (Arabidopsis…
AT2G43430	Chr2:18035368-18038255	19.3281	13.1696	-0.553491	0.0155512	protein_coding	GLX2-1 (GLYOXALASE 2-1); hydroxyacylglutathione hydrolase	glyoxalase II mitochondrial isozyme (Glx2-1) mRNA, nuclear	GLYOXALASE 2-1 (GLX2-1); FUNCTIONS IN: hydroxyacylglutathione hydrolase activity; INVOLVED IN: methylglyoxal catabolic process to D-lactate; LOCATED IN: cytoplasm; EXPRESSED IN: 23 plant structures; EXPRESSED DURING: 13 growth stages; CONTAINS InterPro DOMAIN/s: Beta-lactamase, class B, conserved site (InterPro:IPR001018), Beta-lactamase-like (InterPro:IPR001279), Hydroxyacylglutathione hydrolase…
AT4G16141	Chr4:9131649-9133156	41.8708	28.4743	-0.556286	0.00495603	protein_coding	sequence-specific DNA binding / transcription factor/ zinc ion binding		sequence-specific DNA binding / transcription factor/ zinc ion binding; FUNCTIONS IN: transcription factor activity, sequence-specific DNA binding, zinc ion binding; INVOLVED IN: regulation of transcription, DNA-dependent; LOCATED IN: nucleus; CONTAINS InterPro DOMAIN/s: Zinc finger, NHR/GATA-type (InterPro:IPR013088), Zinc finger, GATA-type (InterPro:IPR000679); BEST Arabidopsis thaliana protein…
AT4G03560	Chr4:1580055-1585966	74.4401	50.5485	-0.558412	0.00101675	protein_coding	ATTPC1 (TWO-PORE CHANNEL 1); calcium channel/ voltage-gated calcium channel	Encodes a depolarization-activated Ca(2+) channel. Anti-sense experiments with this gene as well as Sucrose-H(+) symporters and complementation of yeast sucrose uptake mutant cch1 suggest that this protein mediates a voltage-activated Ca(2+ )influx. Mutants lack detectable SV channel activity suggesting TPC1 is essential component of the SV channel. Patch clamp analysis of loss of function mutati…	TWO-PORE CHANNEL 1 (ATTPC1); FUNCTIONS IN: voltage-gated calcium channel activity, calcium channel activity; INVOLVED IN: calcium ion transport, jasmonic acid biosynthetic process, regulation of stomatal movement, seed germination; LOCATED IN: vacuolar membrane, plasma membrane, vacuole, plant-type vacuole; EXPRESSED IN: 25 plant structures; EXPRESSED DURING: 15 growth stages; CONTAINS InterPro D…
AT5G50840	Chr5:20685819-20688918	15.6778	10.6377	-0.559544	0.0126993	protein_coding			INVOLVED IN: biological_process unknown; EXPRESSED IN: 22 plant structures; EXPRESSED DURING: 13 growth stages; BEST Arabidopsis thaliana protein match is: LINC2 (LITTLE NUCLEI2) (TAIR:AT1G13220.2); Has 50047 Blast hits to 27335 proteins in 1173 species: Archae - 429; Bacteria - 3521; Metazoa - 26018; Fungi - 2663; Plants - 1200; Viruses - 162; Other Eukaryotes - 16054 (source: NCBI BLink).
AT3G28070	Chr3:10447921-10451034	27.6249	18.7386	-0.559956	0.0196832	protein_coding	nodulin MtN21 family protein		nodulin MtN21 family protein; FUNCTIONS IN: molecular_function unknown; INVOLVED IN: biological_process unknown; LOCATED IN: membrane; CONTAINS InterPro DOMAIN/s: Protein of unknown function DUF6, transmembrane (InterPro:IPR000620); BEST Arabidopsis thaliana protein match is: nodulin MtN21 family protein (TAIR:AT3G28080.1); Has 1514 Blast hits to 1505 proteins in 240 species: Archae - 12; Bacteri…
AT1G25390	Chr1:8906451-8908854	12.5485	8.50038	-0.561921	0.00888141	protein_coding	protein kinase family protein		protein kinase family protein; FUNCTIONS IN: kinase activity; INVOLVED IN: protein amino acid phosphorylation; LOCATED IN: plasma membrane; EXPRESSED IN: 23 plant structures; EXPRESSED DURING: 13 growth stages; CONTAINS InterPro DOMAIN/s: Protein kinase, ATP binding site (InterPro:IPR017441), Protein kinase, core (InterPro:IPR000719), Serine/threonine protein kinase-related (InterPro:IPR017442), …
AT1G68780	Chr1:25831802-25833844	11.3162	7.66536	-0.561958	0.0150913	protein_coding	leucine-rich repeat family protein		leucine-rich repeat family protein; FUNCTIONS IN: protein binding; INVOLVED IN: signal transduction; LOCATED IN: endomembrane system; EXPRESSED IN: 18 plant structures; EXPRESSED DURING: 12 growth stages; CONTAINS InterPro DOMAIN/s: Leucine-rich repeat (InterPro:IPR001611); BEST Arabidopsis thaliana protein match is: leucine-rich repeat family protein (TAIR:AT3G25670.1); Has 48682 Blast hits to 1…
AT1G10570	Chr1:3487583-3491277	11.3806	7.69527	-0.564537	0.0131813	protein_coding	OTS2 (OVERLY TOLERANT TO SALT 2); SUMO-specific protease/ cysteine-type peptidase	Encodes a deSUMOylating enzyme. In vitro it has both peptidase activity and isopeptidase activity: it can cleave the C-terminal residues from SUMO to activate it for attachment to a target protein and it can also act on the isopeptide bond between SUMO and another protein. sYFP:OTS2 protein accumulates in nuclei in a punctate pattern. Double mutant analysis with ULP1D/OTS1 indicates that these ge…	OVERLY TOLERANT TO SALT 2 (OTS2); FUNCTIONS IN: cysteine-type peptidase activity, SUMO-specific protease activity; INVOLVED IN: response to salt stress, proteolysis, protein desumoylation, vegetative to reproductive phase transition; LOCATED IN: nucleus; EXPRESSED IN: 22 plant structures; EXPRESSED DURING: 13 growth stages; CONTAINS InterPro DOMAIN/s: Peptidase C48, SUMO/Sentrin/Ubl1 (InterPro:IP…
AT4G23570	Chr4:12299822-12302719	42.8526	28.9653	-0.565055	0.0199979	protein_coding	SGT1A; protein binding	Closely related to SGT1B, may function in SCF(TIR1) mediated protein degradation. AtSGT1a and AtSGT1b are functionally redundant in the resistance to pathogenes. AtSGT1b was more highly expressed than AtSGT1. The N-terminal TPR domain of AtSGT1a reduces the steady-state level of Arabidopsis SGT1 proteins whereas the same domain from AtSGT1b enhances SGT1 accumulation. The TPR domain is dispensabl…	SGT1A; FUNCTIONS IN: protein binding; INVOLVED IN: embryonic development ending in seed dormancy, defense response, ubiquitin-dependent protein catabolic process; LOCATED IN: SCF ubiquitin ligase complex, nucleus; EXPRESSED IN: 22 plant structures; EXPRESSED DURING: 13 growth stages; CONTAINS InterPro DOMAIN/s: Tetratricopeptide TPR-1 (InterPro:IPR001440), Tetratricopeptide-like helical (InterPro…
AT5G64552	Chr5:25801527-25804980	10.2727	6.93786	-0.566254	0.00857443	protein_coding	CPuORF22 (Conserved peptide upstream open reading frame 22)	Upstream open reading frames (uORFs) are small open reading frames found in the 5' UTR of a mature mRNA, and can potentially mediate translational regulation of the largest, or major, ORF (mORF). CPuORF22 represents a conserved upstream opening reading frame relative to major ORF AT5G64550.1	Conserved peptide upstream open reading frame 22 (CPuORF22); Has 0 Blast hits to 0 proteins in 0 species (source: NCBI BLink).
AT2G41540	Chr2:17326092-17328902	15.873	10.7188	-0.566429	0.0385847	protein_coding	GPDHC1; NAD or NADH binding / glycerol-3-phosphate dehydrogenase (NAD+)	Encodes a protein with NAD-dependent glycerol-3-phosphate (G3P) dehydrogenase which was shown to complement an Escherichia coli strain: BB20-14, auxotrophic for glycerol/G3P due to a loss-of-function mutation in the gpsA gene.	GPDHC1; FUNCTIONS IN: glycerol-3-phosphate dehydrogenase (NAD+) activity, NAD or NADH binding; INVOLVED IN: response to salt stress, response to flooding, response to water deprivation, glycerol-3-phosphate metabolic process, response to abscisic acid stimulus; LOCATED IN: cytosol, glycerol-3-phosphate dehydrogenase complex; EXPRESSED IN: 23 plant structures; EXPRESSED DURING: 14 growth stages; C…
AT4G24530	Chr4:12667357-12670013	9.11198	6.15269	-0.566546	0.0224782	protein_coding	unknown protein		unknown protein; FUNCTIONS IN: molecular_function unknown; INVOLVED IN: biological_process unknown; LOCATED IN: cellular_component unknown; EXPRESSED IN: 23 plant structures; EXPRESSED DURING: 13 growth stages; CONTAINS InterPro DOMAIN/s: Protein of unknown function DUF246, plant (InterPro:IPR004348); BEST Arabidopsis thaliana protein match is: unknown protein (TAIR:AT5G65470.1); Has 438 Blast hi…
AT1G68520	Chr1:25709113-25710907	198.119	133.638	-0.56804	0.00101141	protein_coding	zinc finger (B-box type) family protein		zinc finger (B-box type) family protein; FUNCTIONS IN: transcription factor activity, zinc ion binding; INVOLVED IN: regulation of transcription; LOCATED IN: intracellular; EXPRESSED IN: 21 plant structures; EXPRESSED DURING: 13 growth stages; CONTAINS InterPro DOMAIN/s: CCT domain (InterPro:IPR010402), Zinc finger, B-box (InterPro:IPR000315); BEST Arabidopsis thaliana protein match is: zinc fing…
AT5G05830	Chr5:1755765-1757085	14.4139	9.72215	-0.568116	0.0427189	protein_coding	zinc finger (C3HC4-type RING finger) family protein		zinc finger (C3HC4-type RING finger) family protein; FUNCTIONS IN: protein binding, zinc ion binding; CONTAINS InterPro DOMAIN/s: Zinc finger, RING/FYVE/PHD-type (InterPro:IPR013083), Zinc finger, RING-CH-type (InterPro:IPR011016); BEST Arabidopsis thaliana protein match is: zinc finger (C3HC4-type RING finger) family protein (TAIR:AT5G01070.2); Has 323 Blast hits to 323 proteins in 30 species: A…
AT3G21810	Chr3:7684429-7691504	10.9023	7.34697	-0.569415	0.0364847	protein_coding	zinc finger (CCCH-type) family protein		zinc finger (CCCH-type) family protein; FUNCTIONS IN: zinc ion binding, nucleic acid binding; INVOLVED IN: biological_process unknown; LOCATED IN: cellular_component unknown; EXPRESSED IN: 22 plant structures; EXPRESSED DURING: 13 growth stages; CONTAINS InterPro DOMAIN/s: Zinc finger, CCCH-type (InterPro:IPR000571); Has 758 Blast hits to 705 proteins in 126 species: Archae - 7; Bacteria - 25; Me…
AT1G16840	Chr1:5762693-5764073	54.5572	36.7515	-0.569967	0.0310717	protein_coding	unknown protein		unknown protein; FUNCTIONS IN: molecular_function unknown; INVOLVED IN: biological_process unknown; LOCATED IN: cellular_component unknown; EXPRESSED IN: 23 plant structures; EXPRESSED DURING: 15 growth stages; BEST Arabidopsis thaliana protein match is: unknown protein (TAIR:AT1G78890.1); Has 50 Blast hits to 50 proteins in 9 species: Archae - 0; Bacteria - 0; Metazoa - 0; Fungi - 0; Plants - 50…
AT5G08710	Chr5:2834742-2838090	10.0414	6.75888	-0.571111	0.0258614	protein_coding	regulator of chromosome condensation (RCC1) family protein / UVB-resistance protein-related		regulator of chromosome condensation (RCC1) family protein / UVB-resistance protein-related; FUNCTIONS IN: chromatin binding, Ran GTPase binding; INVOLVED IN: biological_process unknown; CONTAINS InterPro DOMAIN/s: Regulator of chromosome condensation/beta-lactamase-inhibitor protein II (InterPro:IPR009091), Regulator of chromosome condensation, RCC1 (InterPro:IPR000408); BEST Arabidopsis thalian…
AT1G04160	Chr1:1086494-1096146	3.5432	2.38025	-0.573941	0.0223907	protein_coding	XIB (MYOSIN XI B); motor	Encodes a member of the type XI myosin protein family involved in root hair elongation.	MYOSIN XI B (XIB); FUNCTIONS IN: motor activity; INVOLVED IN: root hair elongation, actin filament-based movement; LOCATED IN: myosin complex; EXPRESSED IN: 20 plant structures; EXPRESSED DURING: 10 growth stages; CONTAINS InterPro DOMAIN/s: Dil domain (InterPro:IPR018444), Dilute (InterPro:IPR002710), Myosin, N-terminal, SH3-like (InterPro:IPR004009), Myosin head, motor region (InterPro:IPR00160…
AT1G76180	Chr1:28586772-28587877	610.139	409.539	-0.575137	0.00169822	protein_coding	ERD14 (EARLY RESPONSE TO DEHYDRATION 14); calcium ion binding	Encodes a dehydrin protein whose expression is induced early on in response to dehydration stress. This gene's expression to cold occurs in two waves, with early induction occurring within 1 h and secondary induction occurring 5 h after the beginning of cold stress. Expression is also induced in response to ABA but not in response to 2,4-D, BA, and GA3. ERD14 protein is capable of binding Ca2+, e…	EARLY RESPONSE TO DEHYDRATION 14 (ERD14); FUNCTIONS IN: calcium ion binding; INVOLVED IN: in 7 processes; LOCATED IN: plasma membrane, chloroplast; EXPRESSED IN: 26 plant structures; EXPRESSED DURING: 14 growth stages; CONTAINS InterPro DOMAIN/s: Dehydrin (InterPro:IPR000167); BEST Arabidopsis thaliana protein match is: ERD10 (EARLY RESPONSIVE TO DEHYDRATION 10); actin binding (TAIR:AT1G20450.2);…
AT5G11060	Chr5:3510117-3513305	75.9034	50.9418	-0.575313	0.000710277	protein_coding	KNAT4 (KNOTTED1-LIKE HOMEOBOX GENE 4); transcription activator/ transcription factor	A member of Class II KN1-like homeodomain transcription factors (together with KNAT3 and KNAT5), with greatest homology to the maize knox1 homeobox protein. Expression regulated by light. Detected in all tissues examined, but most prominent in leaves and young siliques. Transient expression of GFP translational fusion protein suggests bipartite localization in nucleus and cytoplasm. KNAT4 promote…	KNOTTED1-LIKE HOMEOBOX GENE 4 (KNAT4); FUNCTIONS IN: transcription factor activity, transcription activator activity; INVOLVED IN: response to light stimulus; LOCATED IN: cytosol, nucleus, cytoplasm; EXPRESSED IN: 27 plant structures; EXPRESSED DURING: 13 growth stages; CONTAINS InterPro DOMAIN/s: KNOX2 (InterPro:IPR005541), ELK (InterPro:IPR005539), Homeobox (InterPro:IPR001356), Homeobox, conse…
AT2G02080	Chr2:518158-521707	24.9333	16.7306	-0.575587	0.00340556	protein_coding	AtIDD4 (Arabidopsis thaliana Indeterminate(ID)-Domain 4); transcription factor		Arabidopsis thaliana Indeterminate(ID)-Domain 4 (AtIDD4); FUNCTIONS IN: transcription factor activity; LOCATED IN: intracellular, chloroplast; EXPRESSED IN: 20 plant structures; EXPRESSED DURING: 13 growth stages; CONTAINS InterPro DOMAIN/s: Zinc finger, C2H2-like (InterPro:IPR015880), Zinc finger, C2H2-type (InterPro:IPR007087); BEST Arabidopsis thaliana protein match is: zinc finger (C2H2 type)…
AT3G02070	Chr3:360920-363429	12.5754	8.43311	-0.576467	0.0394541	protein_coding	OTU-like cysteine protease family protein		OTU-like cysteine protease family protein; FUNCTIONS IN: cysteine-type peptidase activity; INVOLVED IN: biological_process unknown; LOCATED IN: cellular_component unknown; EXPRESSED IN: 24 plant structures; EXPRESSED DURING: 15 growth stages; CONTAINS InterPro DOMAIN/s: Ovarian tumour, otubain (InterPro:IPR003323); BEST Arabidopsis thaliana protein match is: OTU-like cysteine protease family prot…
AT5G54200	Chr5:21993348-21997076	6.03653	4.04526	-0.577485	0.0220462	protein_coding	WD-40 repeat family protein		WD-40 repeat family protein; FUNCTIONS IN: signal transducer activity; INVOLVED IN: signal transduction; LOCATED IN: heterotrimeric G-protein complex; EXPRESSED IN: 21 plant structures; EXPRESSED DURING: 12 growth stages; CONTAINS InterPro DOMAIN/s: WD40 repeat-like (InterPro:IPR011046), WD40 repeat, region (InterPro:IPR017986), WD40/YVTN repeat-like (InterPro:IPR015943), WD40 repeat (InterPro:IP…
AT5G16730	Chr5:5497642-5500845	31.6676	21.2082	-0.578385	0.00102124	protein_coding			LOCATED IN: chloroplast; EXPRESSED IN: 23 plant structures; EXPRESSED DURING: 13 growth stages; CONTAINS InterPro DOMAIN/s: Spectrin/alpha-actinin (InterPro:IPR018159); BEST Arabidopsis thaliana protein match is: unknown protein (TAIR:AT3G02930.1); Has 241703 Blast hits to 112530 proteins in 2711 species: Archae - 2642; Bacteria - 41887; Metazoa - 104467; Fungi - 18239; Plants - 8786; Viruses - 1…
AT2G36350	Chr2:15238092-15241923	6.03815	4.04301	-0.578677	0.0149179	protein_coding	protein kinase, putative		protein kinase, putative; FUNCTIONS IN: kinase activity; INVOLVED IN: protein amino acid phosphorylation; LOCATED IN: plasma membrane; EXPRESSED IN: 17 plant structures; EXPRESSED DURING: 7 growth stages; CONTAINS InterPro DOMAIN/s: Protein kinase, core (InterPro:IPR000719), Serine/threonine protein kinase (InterPro:IPR002290), Serine/threonine protein kinase-related (InterPro:IPR017442), Protein…
AT5G21170	Chr5:7205561-7208496	25.1446	16.8287	-0.579327	0.0093305	protein_coding	5'-AMP-activated protein kinase beta-2 subunit, putative		5'-AMP-activated protein kinase beta-2 subunit, putative; FUNCTIONS IN: AMP-activated protein kinase activity; INVOLVED IN: N-terminal protein myristoylation; LOCATED IN: chloroplast; EXPRESSED IN: 24 plant structures; EXPRESSED DURING: 15 growth stages; CONTAINS InterPro DOMAIN/s: 5-AMP-activated protein kinase, beta subunit, complex-interacting region (InterPro:IPR006828); BEST Arabidopsis thal…
AT1G50710	Chr1:18781913-18787802	13.2763	8.88366	-0.579626	0.0217749	protein_coding	unknown protein		unknown protein; FUNCTIONS IN: molecular_function unknown; INVOLVED IN: biological_process unknown; LOCATED IN: cellular_component unknown; Has 75 Blast hits to 75 proteins in 32 species: Archae - 0; Bacteria - 2; Metazoa - 46; Fungi - 9; Plants - 16; Viruses - 0; Other Eukaryotes - 2 (source: NCBI BLink).
AT3G46960	Chr3:17289368-17298067	8.86112	5.92757	-0.580048	0.00707798	protein_coding	ATP binding / ATP-dependent helicase/ helicase/ hydrolase, acting on acid anhydrides, in phosphorus-containing anhydrides / nucleic acid binding		ATP binding / ATP-dependent helicase/ helicase/ hydrolase, acting on acid anhydrides, in phosphorus-containing anhydrides / nucleic acid binding; FUNCTIONS IN: hydrolase activity, acting on acid anhydrides, in phosphorus-containing anhydrides, helicase activity, ATP-dependent helicase activity, ATP binding, nucleic acid binding; INVOLVED IN: biological_process unknown; LOCATED IN: vacuole; EXPRES…
AT5G18130	Chr5:5995478-5997498	39.1252	26.1694	-0.580218	0.00272638	protein_coding	unknown protein		unknown protein; FUNCTIONS IN: molecular_function unknown; INVOLVED IN: biological_process unknown; LOCATED IN: cellular_component unknown; EXPRESSED IN: 15 plant structures; EXPRESSED DURING: 8 growth stages; BEST Arabidopsis thaliana protein match is: unknown protein (TAIR:AT3G03870.2); Has 26 Blast hits to 26 proteins in 7 species: Archae - 0; Bacteria - 0; Metazoa - 0; Fungi - 0; Plants - 26;…
AT2G35650	Chr2:14985487-14988357	15.9433	10.6536	-0.581619	0.00462755	protein_coding	ATCSLA07 (CELLULOSE SYNTHASE LIKE); mannan synthase/ transferase, transferring glycosyl groups	a member of Glycosyltransferase- Family 2 and encodes a beta-mannan synthase based on in vitro enzyme assays from heterologously expressed protein. Mutants exhibit defects in pollen tube growth and embryo development. The defective embryonic development was associated with reduced proliferation and failed cellularization of the endosperm.	CELLULOSE SYNTHASE LIKE (ATCSLA07); FUNCTIONS IN: transferase activity, transferring glycosyl groups, mannan synthase activity; INVOLVED IN: embryonic development ending in seed dormancy, pollen tube growth; EXPRESSED IN: 24 plant structures; EXPRESSED DURING: 13 growth stages; CONTAINS InterPro DOMAIN/s: Glycosyl transferase, family 2 (InterPro:IPR001173); BEST Arabidopsis thaliana protein match…
AT5G53020	Chr5:21499898-21502401	10.105	6.75007	-0.582094	0.00946277	protein_coding	unknown protein		unknown protein; INVOLVED IN: biological_process unknown; EXPRESSED IN: 22 plant structures; EXPRESSED DURING: 13 growth stages; BEST Arabidopsis thaliana protein match is: unknown protein (TAIR:AT3G45900.1); Has 50027 Blast hits to 29202 proteins in 1292 species: Archae - 519; Bacteria - 4159; Metazoa - 27089; Fungi - 3209; Plants - 1476; Viruses - 175; Other Eukaryotes - 13400 (source: NCBI BLi…
AT4G30110	Chr4:14720240-14724584	7.50801	5.01475	-0.582252	0.0110506	protein_coding	HMA2; cadmium-transporting ATPase	encodes a protein similar to Zn-ATPase, a P1B-type ATPases transport zinc	HMA2; FUNCTIONS IN: cadmium-transporting ATPase activity; INVOLVED IN: metabolic process, ATP biosynthetic process, metal ion transport; LOCATED IN: endomembrane system, integral to membrane, membrane; EXPRESSED IN: 11 plant structures; EXPRESSED DURING: 6 growth stages; CONTAINS InterPro DOMAIN/s: Heavy metal transport/detoxification protein (InterPro:IPR006121), ATPase, P-type, ATPase-associate…
AT2G02480	Chr2:660742-665635	4.56408	3.04753	-0.582682	0.0136118	protein_coding	STI (STICHEL); ATP binding / DNA binding / DNA-directed DNA polymerase	STICHEL mutant shows trichomes with fewer than normal branches.	STICHEL (STI); FUNCTIONS IN: DNA binding, DNA-directed DNA polymerase activity, ATP binding; INVOLVED IN: trichome branching, trichome differentiation; LOCATED IN: plasma membrane; EXPRESSED IN: 20 plant structures; EXPRESSED DURING: 11 growth stages; CONTAINS InterPro DOMAIN/s: ATPase, AAA-type, core (InterPro:IPR003959), DNA polymerase III clamp loader subunit, C-terminal (InterPro:IPR008921), …
AT1G50360	Chr1:18649746-18657376	9.46526	6.31075	-0.584832	0.00245089	protein_coding	VIIIA; motor	member of Myosin-like proteins	VIIIA; FUNCTIONS IN: motor activity; INVOLVED IN: actin filament-based movement; LOCATED IN: plasma membrane, myosin complex; EXPRESSED IN: 24 plant structures; EXPRESSED DURING: 13 growth stages; CONTAINS InterPro DOMAIN/s: Myosin head, motor region (InterPro:IPR001609), IQ calmodulin-binding region (InterPro:IPR000048); BEST Arabidopsis thaliana protein match is: ATM1 (ARABIDOPSIS THALIANA MYOS…
AT3G21480	Chr3:7567729-7572161	4.56019	3.03771	-0.586107	0.0236281	protein_coding			FUNCTIONS IN: molecular_function unknown; INVOLVED IN: biological_process unknown; LOCATED IN: intracellular; CONTAINS InterPro DOMAIN/s: BRCT (InterPro:IPR001357); BEST Arabidopsis thaliana protein match is: transcription coactivator (TAIR:AT4G03130.1); Has 489 Blast hits to 455 proteins in 115 species: Archae - 2; Bacteria - 37; Metazoa - 270; Fungi - 30; Plants - 45; Viruses - 0; Other Eukaryo…
AT4G32710	Chr4:15781044-15783461	7.80733	5.1918	-0.588595	0.0411475	protein_coding	ATP binding / kinase/ protein kinase/ protein serine/threonine kinase/ protein tyrosine kinase		ATP binding / kinase/ protein kinase/ protein serine/threonine kinase/ protein tyrosine kinase; FUNCTIONS IN: protein serine/threonine kinase activity, protein tyrosine kinase activity, protein kinase activity, kinase activity, ATP binding; INVOLVED IN: protein amino acid phosphorylation; EXPRESSED IN: 28 plant structures; EXPRESSED DURING: 13 growth stages; CONTAINS InterPro DOMAIN/s: Protein ki…
AT1G33560	Chr1:12168767-12172005	6.25677	4.15053	-0.592123	0.0160292	protein_coding	ADR1 (ACTIVATED DISEASE RESISTANCE 1); kinase	Encodes a NBS-LRR disease resistance protein that possesses N-terminal kinase subdomains. Activation tagged mutant of ADR1 showed elevated levels of SA and reactive oxygen species in addition to number of defense gene transcripts. Exhibits resistance to number of microbial pathogens.	ACTIVATED DISEASE RESISTANCE 1 (ADR1); FUNCTIONS IN: kinase activity; INVOLVED IN: response to water deprivation, response to other organism, defense response; LOCATED IN: endomembrane system; EXPRESSED IN: 21 plant structures; EXPRESSED DURING: 13 growth stages; CONTAINS InterPro DOMAIN/s: Disease resistance, plant (InterPro:IPR014011), NB-ARC (InterPro:IPR002182); BEST Arabidopsis thaliana prot…
AT3G14980	Chr3:5039930-5045403	8.381	5.55794	-0.592571	0.00374981	protein_coding	PHD finger transcription factor, putative		PHD finger transcription factor, putative; FUNCTIONS IN: protein binding, DNA binding, zinc ion binding, N-acetyltransferase activity; INVOLVED IN: regulation of transcription, DNA-dependent, metabolic process; LOCATED IN: nucleus; EXPRESSED IN: 18 plant structures; EXPRESSED DURING: 8 growth stages; CONTAINS InterPro DOMAIN/s: GCN5-related N-acetyltransferase (InterPro:IPR000182), Zinc finger, R…
AT1G60200	Chr1:22200732-22205288	23.5229	15.5679	-0.595491	0.00084759	protein_coding	splicing factor PWI domain-containing protein / RNA recognition motif (RRM)-containing protein		splicing factor PWI domain-containing protein / RNA recognition motif (RRM)-containing protein; FUNCTIONS IN: nucleotide binding, nucleic acid binding; INVOLVED IN: mRNA processing; LOCATED IN: chloroplast; EXPRESSED IN: 24 plant structures; EXPRESSED DURING: 13 growth stages; CONTAINS InterPro DOMAIN/s: RNA recognition motif, RNP-1 (InterPro:IPR000504), Nucleotide-binding, alpha-beta plait (Inte…
AT2G38580	Chr2:16138569-16142588	13.8671	9.17526	-0.59585	0.00702439	protein_coding	unknown protein		unknown protein; FUNCTIONS IN: molecular_function unknown; INVOLVED IN: biological_process unknown; LOCATED IN: cellular_component unknown; EXPRESSED IN: 23 plant structures; EXPRESSED DURING: 13 growth stages; BEST Arabidopsis thaliana protein match is: unknown protein (TAIR:AT1G65010.1); Has 59428 Blast hits to 34448 proteins in 1513 species: Archae - 407; Bacteria - 6232; Metazoa - 29606; Fung…
AT2G36145	Chr2:15168540-15169514	80.4744	53.2445	-0.595898	0.00162126	protein_coding	unknown protein		unknown protein; FUNCTIONS IN: molecular_function unknown; INVOLVED IN: biological_process unknown; LOCATED IN: chloroplast thylakoid membrane, chloroplast stroma, chloroplast; EXPRESSED IN: 19 plant structures; EXPRESSED DURING: 13 growth stages; Has 27 Blast hits to 27 proteins in 9 species: Archae - 0; Bacteria - 0; Metazoa - 0; Fungi - 0; Plants - 27; Viruses - 0; Other Eukaryotes - 0 (source…
AT5G61190	Chr5:24615479-24620053	14.242	9.41596	-0.596969	0.00183259	protein_coding	zinc finger protein-related		zinc finger protein-related; FUNCTIONS IN: zinc ion binding, nucleic acid binding; LOCATED IN: chloroplast; EXPRESSED IN: 23 plant structures; EXPRESSED DURING: 13 growth stages; CONTAINS InterPro DOMAIN/s: Zinc finger, C2H2-like (InterPro:IPR015880), Protein of unknown function DUF537 (InterPro:IPR007491), Zinc finger, U1-type (InterPro:IPR003604), Zinc finger, C2H2-type (InterPro:IPR007087); BE…
AT5G20270	Chr5:6840832-6842858	27.2696	18.0231	-0.597448	0.0025961	protein_coding	HHP1 (HEPTAHELICAL TRANSMEMBRANE PROTEIN1); receptor	heptahelical transmembrane protein homologous to human adiponectin receptors and progestin receptors	HEPTAHELICAL TRANSMEMBRANE PROTEIN1 (HHP1); FUNCTIONS IN: receptor activity; INVOLVED IN: response to salt stress, response to hormone stimulus, response to sucrose stimulus; LOCATED IN: integral to membrane; EXPRESSED IN: 24 plant structures; EXPRESSED DURING: 13 growth stages; CONTAINS InterPro DOMAIN/s: Hly-III related (InterPro:IPR004254); BEST Arabidopsis thaliana protein match is: HHP2 (HEP…
AT3G16230	Chr3:5500552-5503543	19.5875	12.9233	-0.599953	0.00381597	protein_coding	RNA binding / catalytic		RNA binding / catalytic; FUNCTIONS IN: RNA binding, catalytic activity; INVOLVED IN: RNA metabolic process, regulation of transcription; LOCATED IN: mitochondrion; EXPRESSED IN: 22 plant structures; EXPRESSED DURING: 13 growth stages; CONTAINS InterPro DOMAIN/s: K Homology (InterPro:IPR004087), K Homology, type 1, subgroup (InterPro:IPR018111), K Homology, type 1 (InterPro:IPR004088), Predicted e…
AT4G23990	Chr4:12456488-12460753	4.70355	3.1028	-0.600178	0.0387613	protein_coding	ATCSLG3; cellulose synthase/ transferase/ transferase, transferring glycosyl groups	encodes a protein similar to cellulose synthase	ATCSLG3; FUNCTIONS IN: cellulose synthase activity, transferase activity, transferring glycosyl groups, transferase activity; INVOLVED IN: cellulose biosynthetic process, polysaccharide biosynthetic process; LOCATED IN: membrane; EXPRESSED IN: 13 plant structures; EXPRESSED DURING: 8 growth stages; CONTAINS InterPro DOMAIN/s: Cellulose synthase (InterPro:IPR005150); BEST Arabidopsis thaliana prot…
AT3G11210	Chr3:3510662-3513060	8.94079	5.89425	-0.601093	0.0421034	protein_coding	GDSL-motif lipase/hydrolase family protein		GDSL-motif lipase/hydrolase family protein; FUNCTIONS IN: hydrolase activity, hydrolase activity, acting on ester bonds, carboxylesterase activity; INVOLVED IN: lipid metabolic process; LOCATED IN: cellular_component unknown; EXPRESSED IN: 20 plant structures; EXPRESSED DURING: 12 growth stages; CONTAINS InterPro DOMAIN/s: Esterase, SGNH hydrolase-type, subgroup (InterPro:IPR013831), Lipase, GDSL…
AT2G36330	Chr2:15233521-15235453	14.8004	9.75703	-0.601124	0.0236561	protein_coding			FUNCTIONS IN: molecular_function unknown; LOCATED IN: plasma membrane, membrane; EXPRESSED IN: 22 plant structures; EXPRESSED DURING: 13 growth stages; CONTAINS InterPro DOMAIN/s: Uncharacterised protein family UPF0497, trans-membrane plant (InterPro:IPR006702); BEST Arabidopsis thaliana protein match is: integral membrane protein, putative (TAIR:AT5G62820.1); Has 132 Blast hits to 130 proteins i…
AT2G16870	Chr2:7308076-7311686	3.35764	2.21161	-0.602349	0.0411717	protein_coding	disease resistance protein (TIR-NBS-LRR class), putative		disease resistance protein (TIR-NBS-LRR class), putative; FUNCTIONS IN: protein binding, transmembrane receptor activity, nucleoside-triphosphatase activity, nucleotide binding, ATP binding; INVOLVED IN: signal transduction, defense response, apoptosis, innate immune response; LOCATED IN: intrinsic to membrane; CONTAINS InterPro DOMAIN/s: ATPase, AAA+ type, core (InterPro:IPR003593), NB-ARC (Inte…
AT1G51600	Chr1:19125582-19135541	10.91	7.18123	-0.603354	0.00210636	protein_coding	TIFY2A; sequence-specific DNA binding / transcription factor/ zinc ion binding	member of a novel family of plant-specific GATA-type transcription factors.	TIFY2A; FUNCTIONS IN: transcription factor activity, sequence-specific DNA binding, zinc ion binding; INVOLVED IN: regulation of transcription, DNA-dependent; LOCATED IN: nucleus; EXPRESSED IN: 24 plant structures; EXPRESSED DURING: 14 growth stages; CONTAINS InterPro DOMAIN/s: Tify (InterPro:IPR010399), Zinc finger, GATA-type (InterPro:IPR000679), CCT domain (InterPro:IPR010402); BEST Arabidopsi…
AT4G24160	Chr4:12539776-12542489	10.9828	7.21448	-0.606275	0.0184562	protein_coding	hydrolase, alpha/beta fold family protein		hydrolase, alpha/beta fold family protein; FUNCTIONS IN: hydrolase activity; EXPRESSED IN: 24 plant structures; EXPRESSED DURING: 15 growth stages; CONTAINS InterPro DOMAIN/s: Alpha/beta hydrolase fold-1 (InterPro:IPR000073); BEST Arabidopsis thaliana protein match is: hydrolase, alpha/beta fold family protein (TAIR:AT4G36530.2); Has 8951 Blast hits to 8929 proteins in 1171 species: Archae - 61; …
AT5G16880	Chr5:5548913-5551463	61.4239	40.3477	-0.606316	0.00657514	protein_coding	VHS domain-containing protein / GAT domain-containing protein		VHS domain-containing protein / GAT domain-containing protein; FUNCTIONS IN: protein transporter activity; INVOLVED IN: intracellular protein transport, intra-Golgi vesicle-mediated transport; LOCATED IN: Golgi stack, plasma membrane; EXPRESSED IN: 24 plant structures; EXPRESSED DURING: 15 growth stages; CONTAINS InterPro DOMAIN/s: VHS (InterPro:IPR002014), Target of Myb protein 1 (InterPro:IPR01…
AT1G06390	Chr1:1946787-1952785	36.7543	24.1391	-0.606539	0.0163742	protein_coding	GSK1 (GSK3/SHAGGY-LIKE PROTEIN KINASE 1); glycogen synthase kinase 3/ kinase	encodes a GSK3/shaggy-like protein kinase. Gene expression is induced by NaCl and ABA but not KCl, suggesting that this gene may be involved in response to osmotic stress. This protein can interact with the BZR1 protein involved in brassinosteroid-mediated signaling in a Y2H assay and promotes BZR1 phosphorylation in protoplasts.	GSK3/SHAGGY-LIKE PROTEIN KINASE 1 (GSK1); FUNCTIONS IN: kinase activity, glycogen synthase kinase 3 activity; INVOLVED IN: brassinosteroid mediated signaling, hyperosmotic salinity response, protein amino acid phosphorylation, regulation of protein localization; LOCATED IN: cytosol, plasma membrane; EXPRESSED IN: 24 plant structures; EXPRESSED DURING: 13 growth stages; CONTAINS InterPro DOMAIN/s:…
AT4G27180	Chr4:13614855-13619156	21.0121	13.7909	-0.607502	0.000903443	protein_coding	ATK2 (ARABIDOPSIS THALIANA KINESIN 2); microtubule binding / microtubule motor	kinesin heavy chain subunit	ARABIDOPSIS THALIANA KINESIN 2 (ATK2); FUNCTIONS IN: microtubule binding, microtubule motor activity; INVOLVED IN: microtubule-based movement; LOCATED IN: kinesin complex; EXPRESSED IN: 22 plant structures; EXPRESSED DURING: 13 growth stages; CONTAINS InterPro DOMAIN/s: Kinesin, motor region (InterPro:IPR001752); BEST Arabidopsis thaliana protein match is: ATK3 (ARABIDOPSIS THALIANA KINESIN 3); A…
AT1G59540	Chr1:21874011-21879539	5.00989	3.28778	-0.607667	0.0372739	protein_coding	ZCF125; ATP binding / microtubule motor	Encodes a kinesin-like protein.	ZCF125; FUNCTIONS IN: microtubule motor activity, ATP binding; INVOLVED IN: microtubule-based movement; LOCATED IN: microtubule associated complex; EXPRESSED IN: 17 plant structures; EXPRESSED DURING: 9 growth stages; CONTAINS InterPro DOMAIN/s: Kinesin, motor region (InterPro:IPR001752); BEST Arabidopsis thaliana protein match is: kinesin motor protein-related (TAIR:AT3G10180.1); Has 15930 Blast…
AT1G10760	Chr1:3581033-3590043	240.942	158.073	-0.608095	0.00297159	protein_coding	SEX1 (STARCH EXCESS 1); alpha-glucan, water dikinase	Encodes an &#945;-glucan, water dikinase required for starch degradation. Involved in cold-induced freezing tolerance. Mutations that eliminate the GWD protein or affect the dikinase domain of the enzyme dramatically reduce both the amount of phosphate in the amylopectin and the rate of starch degradation. Mature leaves of these mutants accumulate amounts of starch up to seven times greater than …	STARCH EXCESS 1 (SEX1); FUNCTIONS IN: alpha-glucan, water dikinase activity; INVOLVED IN: cold acclimation, response to symbiotic fungus, response to trehalose stimulus, circadian rhythm, starch catabolic process; LOCATED IN: mitochondrion, chloroplast stroma, chloroplast, chloroplast envelope; EXPRESSED IN: 24 plant structures; EXPRESSED DURING: 14 growth stages; CONTAINS InterPro DOMAIN/s: Pyru…
AT2G15090	Chr2:6542255-6543947	66.378	43.5406	-0.608343	0.000355201	protein_coding	KCS8 (3-KETOACYL-COA SYNTHASE 8); acyltransferase/ catalytic/ transferase, transferring acyl groups other than amino-acyl groups	Encodes KCS8, a member of the 3-ketoacyl-CoA synthase family involved in the biosynthesis of VLCFA (very long chain fatty acids).	3-KETOACYL-COA SYNTHASE 8 (KCS8); FUNCTIONS IN: transferase activity, transferring acyl groups other than amino-acyl groups, catalytic activity, acyltransferase activity; INVOLVED IN: fatty acid elongation, very-long-chain fatty acid metabolic process, response to osmotic stress; LOCATED IN: endoplasmic reticulum; EXPRESSED IN: 23 plant structures; EXPRESSED DURING: 13 growth stages; CONTAINS Int…
AT2G42080	Chr2:17553239-17555504	12.3213	8.06876	-0.610739	0.0460878	protein_coding	DNAJ heat shock N-terminal domain-containing protein		DNAJ heat shock N-terminal domain-containing protein; FUNCTIONS IN: heat shock protein binding; INVOLVED IN: protein folding; LOCATED IN: chloroplast; EXPRESSED IN: 23 plant structures; EXPRESSED DURING: 15 growth stages; CONTAINS InterPro DOMAIN/s: Molecular chaperone, heat shock protein, Hsp40, DnaJ (InterPro:IPR015609), Heat shock protein DnaJ, N-terminal (InterPro:IPR001623); BEST Arabidopsis…
AT3G19190	Chr3:6639710-6648236	12.2776	8.0258	-0.61331	0.000480382	protein_coding			FUNCTIONS IN: molecular_function unknown; INVOLVED IN: biological_process unknown; LOCATED IN: cellular_component unknown; EXPRESSED IN: 22 plant structures; EXPRESSED DURING: 13 growth stages; CONTAINS InterPro DOMAIN/s: ATG2, C-terminal (InterPro:IPR015412); Has 603 Blast hits to 514 proteins in 156 species: Archae - 0; Bacteria - 19; Metazoa - 326; Fungi - 168; Plants - 38; Viruses - 0; Other …
AT4G34250	Chr4:16394707-16396495	13.1706	8.60368	-0.614291	0.00614683	protein_coding	KCS16 (3-KETOACYL-COA SYNTHASE 16); acyltransferase/ catalytic/ transferase, transferring acyl groups other than amino-acyl groups	Encodes KCS16, a member of the 3-ketoacyl-CoA synthase family involved in the biosynthesis of VLCFA (very long chain fatty acids).	3-KETOACYL-COA SYNTHASE 16 (KCS16); FUNCTIONS IN: transferase activity, transferring acyl groups other than amino-acyl groups, catalytic activity, acyltransferase activity; INVOLVED IN: fatty acid elongation, very-long-chain fatty acid metabolic process, response to light stimulus, response to osmotic stress; LOCATED IN: endomembrane system, membrane; EXPRESSED IN: 17 plant structures; EXPRESSED …
AT2G36420	Chr2:15286497-15288990	10.2401	6.67942	-0.616438	0.0298484	protein_coding	unknown protein		unknown protein; FUNCTIONS IN: molecular_function unknown; INVOLVED IN: biological_process unknown; LOCATED IN: cellular_component unknown; BEST Arabidopsis thaliana protein match is: unknown protein (TAIR:AT5G03670.1); Has 11237 Blast hits to 6364 proteins in 349 species: Archae - 8; Bacteria - 288; Metazoa - 5131; Fungi - 1107; Plants - 404; Viruses - 219; Other Eukaryotes - 4080 (source: NCBI …
AT3G05710	Chr3:1684995-1687558	20.6647	13.471	-0.617307	0.0355237	protein_coding	SYP43 (SYNTAXIN OF PLANTS 43); SNAP receptor	member of SYP4 Gene Family	SYNTAXIN OF PLANTS 43 (SYP43); FUNCTIONS IN: SNAP receptor activity; INVOLVED IN: membrane fusion, intracellular protein transport; LOCATED IN: membrane; EXPRESSED IN: 24 plant structures; EXPRESSED DURING: 15 growth stages; CONTAINS InterPro DOMAIN/s: Target SNARE coiled-coil region (InterPro:IPR000727), t-SNARE (InterPro:IPR010989), Syntaxin/epimorphin, conserved site (InterPro:IPR006012), Synt…
AT3G09920	Chr3:3040302-3044768	14.2421	9.28217	-0.617627	0.00648171	protein_coding	PIP5K9 (PHOSPHATIDYL INOSITOL MONOPHOSPHATE 5 KINASE); 1-phosphatidylinositol-4-phosphate 5-kinase/ ATP binding / phosphatidylinositol phosphate kinase		PHOSPHATIDYL INOSITOL MONOPHOSPHATE 5 KINASE (PIP5K9); FUNCTIONS IN: 1-phosphatidylinositol-4-phosphate 5-kinase activity, phosphatidylinositol phosphate kinase activity, ATP binding; INVOLVED IN: amino acid metabolic process, carbohydrate metabolic process; LOCATED IN: cytosol, nucleus, membrane; EXPRESSED IN: 22 plant structures; EXPRESSED DURING: 13 growth stages; CONTAINS InterPro DOMAIN/s: P…
AT1G80420	Chr1:30235219-30238535	18.117	11.7971	-0.618911	0.0188931	protein_coding	DNA repair protein, putative (XRCC1)		DNA repair protein, putative (XRCC1); FUNCTIONS IN: transcription coactivator activity; INVOLVED IN: DNA repair; LOCATED IN: intracellular; EXPRESSED IN: 23 plant structures; EXPRESSED DURING: 13 growth stages; CONTAINS InterPro DOMAIN/s: BRCT (InterPro:IPR001357); Has 209 Blast hits to 209 proteins in 61 species: Archae - 0; Bacteria - 0; Metazoa - 141; Fungi - 20; Plants - 26; Viruses - 0; Othe…
AT2G19170	Chr2:8309815-8318596	10.4084	6.76856	-0.620823	0.0168252	protein_coding	SLP3; serine-type peptidase	Encodes a novel subtilisin-like serine protease.	SLP3; FUNCTIONS IN: serine-type peptidase activity; INVOLVED IN: proteolysis, negative regulation of catalytic activity; LOCATED IN: middle lamella-containing extracellular matrix; EXPRESSED IN: 22 plant structures; EXPRESSED DURING: 13 growth stages; CONTAINS InterPro DOMAIN/s: Protease-associated PA (InterPro:IPR003137), Proteinase inhibitor, propeptide (InterPro:IPR009020), Peptidase S8A, DUF1…
AT5G41460	Chr5:16589597-16592241	10.3534	6.71969	-0.623636	0.0114568	protein_coding	fringe-related protein		fringe-related protein; FUNCTIONS IN: transferase activity, transferring glycosyl groups; INVOLVED IN: biological_process unknown; EXPRESSED IN: 19 plant structures; EXPRESSED DURING: 13 growth stages; CONTAINS InterPro DOMAIN/s: Protein of unknown function DUF604 (InterPro:IPR006740); BEST Arabidopsis thaliana protein match is: fringe-related protein (TAIR:AT4G23490.1); Has 404 Blast hits to 400…
AT2G19950	Chr2:8616092-8621405	14.4428	9.36127	-0.62557	0.00146766	protein_coding	GC1 (Golgin Candidate 1)	This gene is predicted to encode a protein that functions as a Golgi apparatus structural component known as a golgin in mammals and yeast. A fluorescently-tagged version of GC1 co-localizes with Golgi markers, and this localization appears to be replicated using the C-terminal (558-715 aa) portion of the protein.	Golgin Candidate 1 (GC1); FUNCTIONS IN: molecular_function unknown; INVOLVED IN: biological_process unknown; LOCATED IN: Golgi apparatus; BEST Arabidopsis thaliana protein match is: CIP1 (COP1-INTERACTIVE PROTEIN 1); protein binding (TAIR:AT5G41790.1); Has 56866 Blast hits to 33099 proteins in 1762 species: Archae - 485; Bacteria - 7510; Metazoa - 29671; Fungi - 4801; Plants - 2725; Viruses - 176…
AT3G17360	Chr3:5936107-5946466	2.80264	1.81436	-0.627323	0.00966058	protein_coding	POK1 (PHRAGMOPLAST ORIENTING KINESIN 1); ATP binding / microtubule motor	PHRAGMOPLAST ORIENTING KINESIN 1 is one of the two Arabidopsis homologs isolated in yeast two-hybrid screen for interaction partners of maize gene TANGLED1 (TAN1). Based on sequence homology in their motor domains, POK1 and POK2 belong to the kinesin-12 class which also includes the well-characterized group of phragmoplast-associated kinesins AtPAKRPs. Both kinesins are composed of an N-terminal …	PHRAGMOPLAST ORIENTING KINESIN 1 (POK1); FUNCTIONS IN: microtubule motor activity, ATP binding; INVOLVED IN: cytokinesis; LOCATED IN: microtubule associated complex; EXPRESSED IN: 17 plant structures; EXPRESSED DURING: 6 growth stages; CONTAINS InterPro DOMAIN/s: Kinesin-related (InterPro:IPR010544), Kinesin, motor region (InterPro:IPR001752); BEST Arabidopsis thaliana protein match is: POK2 (PHR…
AT3G05470	Chr3:1579666-1582547	3.89248	2.51799	-0.628418	0.0415045	protein_coding	formin homology 2 domain-containing protein / FH2 domain-containing protein		formin homology 2 domain-containing protein / FH2 domain-containing protein; FUNCTIONS IN: actin binding; INVOLVED IN: cellular component organization, actin cytoskeleton organization; LOCATED IN: endomembrane system; EXPRESSED IN: 20 plant structures; EXPRESSED DURING: 11 growth stages; CONTAINS InterPro DOMAIN/s: Actin-binding FH2 and DRF autoregulatory (InterPro:IPR003104), Actin-binding FH2 (…
AT5G05180	Chr5:1536225-1538492	12.2413	7.91729	-0.628682	0.0109515	protein_coding	unknown protein		unknown protein; INVOLVED IN: biological_process unknown; EXPRESSED IN: 20 plant structures; EXPRESSED DURING: 13 growth stages; BEST Arabidopsis thaliana protein match is: unknown protein (TAIR:AT3G10880.1); Has 38143 Blast hits to 20610 proteins in 1061 species: Archae - 562; Bacteria - 2945; Metazoa - 21205; Fungi - 2584; Plants - 1248; Viruses - 101; Other Eukaryotes - 9498 (source: NCBI BLin…
AT2G36490	Chr2:15308020-15314272	21.0482	13.5978	-0.630323	0.000280724	protein_coding	DML1 (DEMETER-LIKE 1); DNA N-glycosylase/ DNA-(apurinic or apyrimidinic site) lyase/ protein binding	A repressor of transcriptional gene silencing. Functions by demethylating the target promoter DNA. Interacts physically with RPA2/ROR1. In the ros1 mutants, an increase in methylation is observed in a number of gene promoters. Among the loci affected by ros1, a few (RD29A and At1g76930) are affected in cytosine methylation in all sequence contexts (CpG, CpNpG or CpNpN), although many others are a…	DEMETER-LIKE 1 (DML1); FUNCTIONS IN: protein binding, DNA N-glycosylase activity, DNA-(apurinic or apyrimidinic site) lyase activity; INVOLVED IN: DNA repair, negative regulation of chromatin silencing, chromatin silencing, DNA methylation, DNA demethylation; LOCATED IN: nucleus; EXPRESSED IN: 21 plant structures; EXPRESSED DURING: 13 growth stages; CONTAINS InterPro DOMAIN/s: DNA glycosylase (In…
AT1G69523	Chr1:26128287-26131292	9.97391	6.43834	-0.631471	0.0313345	protein_coding	UbiE/COQ5 methyltransferase family protein		UbiE/COQ5 methyltransferase family protein; FUNCTIONS IN: methyltransferase activity; INVOLVED IN: metabolic process; LOCATED IN: chloroplast; EXPRESSED IN: 20 plant structures; EXPRESSED DURING: 13 growth stages; CONTAINS InterPro DOMAIN/s: Methyltransferase type 11 (InterPro:IPR013216); BEST Arabidopsis thaliana protein match is: UbiE/COQ5 methyltransferase family protein (TAIR:AT1G69526.2); Ha…
AT1G06590	Chr1:2016307-2024662	3.27627	2.1146	-0.631669	0.0408523	protein_coding	unknown protein		unknown protein; INVOLVED IN: biological_process unknown; EXPRESSED IN: 20 plant structures; EXPRESSED DURING: 10 growth stages; Has 297 Blast hits to 208 proteins in 79 species: Archae - 0; Bacteria - 0; Metazoa - 218; Fungi - 51; Plants - 21; Viruses - 0; Other Eukaryotes - 7 (source: NCBI BLink).
AT4G36400	Chr4:17197211-17200921	14.3248	9.24162	-0.632293	0.0122113	protein_coding	FAD linked oxidase family protein		FAD linked oxidase family protein; FUNCTIONS IN: electron carrier activity, oxidoreductase activity, FAD binding, catalytic activity; INVOLVED IN: biological_process unknown; LOCATED IN: mitochondrion; EXPRESSED IN: 22 plant structures; EXPRESSED DURING: 13 growth stages; CONTAINS InterPro DOMAIN/s: FAD-binding, type 2 (InterPro:IPR016166), FAD-linked oxidase, C-terminal (InterPro:IPR004113), FAD…
AT2G21500	Chr2:9207548-9210231	12.0275	7.75833	-0.632523	0.0275689	protein_coding	protein binding / zinc ion binding		protein binding / zinc ion binding; FUNCTIONS IN: protein binding, zinc ion binding; LOCATED IN: plasma membrane; EXPRESSED IN: cultured cell; CONTAINS InterPro DOMAIN/s: Zinc finger, RING-type (InterPro:IPR001841); BEST Arabidopsis thaliana protein match is: protein binding / zinc ion binding (TAIR:AT4G39140.5); Has 194 Blast hits to 166 proteins in 38 species: Archae - 0; Bacteria - 2; Metazoa …
AT5G57110	Chr5:23109437-23117563	70.5778	45.4045	-0.636378	0.000584079	protein_coding	ACA8 (AUTOINHIBITED CA2+ -ATPASE, ISOFORM 8); calcium-transporting ATPase/ calmodulin binding / protein self-association	Arabidopsis-autoinhibited Ca2+ -ATPase, isoform 8, contains all of the characteristic motifs of Ca2+ -transporting P-type Ca2+ -ATPases and is localized to the plasma membrane.	AUTOINHIBITED CA2+ -ATPASE, ISOFORM 8 (ACA8); FUNCTIONS IN: protein self-association, calmodulin binding, calcium-transporting ATPase activity; INVOLVED IN: response to nematode; LOCATED IN: plasma membrane, membrane; EXPRESSED IN: 26 plant structures; EXPRESSED DURING: 13 growth stages; CONTAINS InterPro DOMAIN/s: ATPase, P-type, ATPase-associated region (InterPro:IPR008250), ATPase, P-type, cal…
AT1G75310	Chr1:28261003-28266124	8.1094	5.19829	-0.641557	0.00168189	protein_coding	AUL1; heat shock protein binding		AUL1; FUNCTIONS IN: heat shock protein binding; INVOLVED IN: protein folding; EXPRESSED IN: 22 plant structures; EXPRESSED DURING: 13 growth stages; CONTAINS InterPro DOMAIN/s: Heat shock protein DnaJ, N-terminal (InterPro:IPR001623); BEST Arabidopsis thaliana protein match is: heat shock protein binding (TAIR:AT4G36520.1); Has 36839 Blast hits to 23716 proteins in 1353 species: Archae - 191; Bac…
AT5G58160	Chr5:23533700-23539465	2.32206	1.48811	-0.641924	0.0458659	protein_coding	actin binding		actin binding; FUNCTIONS IN: actin binding; INVOLVED IN: cellular component organization, actin cytoskeleton organization; EXPRESSED IN: 8 plant structures; EXPRESSED DURING: 4 anthesis, petal differentiation and expansion stage; CONTAINS InterPro DOMAIN/s: Actin-binding FH2 and DRF autoregulatory (InterPro:IPR003104), C2 calcium/lipid-binding region, CaLB (InterPro:IPR008973), Actin-binding FH2 …
AT2G44140	Chr2:18253496-18258035	14.6618	9.39479	-0.642125	0.00800022	protein_coding	autophagy 4a (APG4a)		autophagy 4a (APG4a); FUNCTIONS IN: peptidase activity; INVOLVED IN: autophagy; LOCATED IN: chloroplast; CONTAINS InterPro DOMAIN/s: Peptidase C54 (InterPro:IPR005078); BEST Arabidopsis thaliana protein match is: autophagy 4b (APG4b) (TAIR:AT3G59950.1); Has 685 Blast hits to 659 proteins in 158 species: Archae - 0; Bacteria - 0; Metazoa - 373; Fungi - 125; Plants - 57; Viruses - 0; Other Eukaryot…
AT1G62250	Chr1:22994582-22997613	20.1554	12.9072	-0.642998	0.0167504	protein_coding	unknown protein		unknown protein; LOCATED IN: chloroplast; EXPRESSED IN: 23 plant structures; EXPRESSED DURING: 15 growth stages; Has 16 Blast hits to 16 proteins in 6 species: Archae - 0; Bacteria - 0; Metazoa - 0; Fungi - 0; Plants - 16; Viruses - 0; Other Eukaryotes - 0 (source: NCBI BLink).
AT1G78110	Chr1:29391826-29393334	6.49313	4.15673	-0.643464	0.0485854	protein_coding	unknown protein		unknown protein; FUNCTIONS IN: molecular_function unknown; INVOLVED IN: biological_process unknown; LOCATED IN: plasma membrane; EXPRESSED IN: 17 plant structures; EXPRESSED DURING: 7 growth stages; BEST Arabidopsis thaliana protein match is: unknown protein (TAIR:AT1G22230.1); Has 5858 Blast hits to 3582 proteins in 234 species: Archae - 4; Bacteria - 138; Metazoa - 2289; Fungi - 485; Plants - 1…
AT1G70100	Chr1:26403082-26406119	22.3572	14.2986	-0.644861	0.01114	protein_coding	unknown protein		unknown protein; FUNCTIONS IN: molecular_function unknown; INVOLVED IN: biological_process unknown; LOCATED IN: cellular_component unknown; EXPRESSED IN: 22 plant structures; EXPRESSED DURING: 13 growth stages; BEST Arabidopsis thaliana protein match is: unknown protein (TAIR:AT1G24160.1); Has 2504 Blast hits to 1940 proteins in 240 species: Archae - 7; Bacteria - 399; Metazoa - 992; Fungi - 201;…
AT4G33620	Chr4:16147691-16152853	4.67724	2.9895	-0.645751	0.0320643	protein_coding	Ulp1 protease family protein		Ulp1 protease family protein; FUNCTIONS IN: cysteine-type peptidase activity; INVOLVED IN: proteolysis; LOCATED IN: cellular_component unknown; CONTAINS InterPro DOMAIN/s: Peptidase C48, SUMO/Sentrin/Ubl1 (InterPro:IPR003653); BEST Arabidopsis thaliana protein match is: Ulp1 protease family protein (TAIR:AT1G09730.1); Has 1076 Blast hits to 958 proteins in 142 species: Archae - 0; Bacteria - 0; M…
AT1G08570	Chr1:2712882-2714734	52.7477	33.7094	-0.645955	0.000546311	protein_coding	ACHT4 (ATYPICAL CYS HIS RICH THIOREDOXIN 4); oxidoreductase, acting on sulfur group of donors, disulfide as acceptor	Encodes a member of the thioredoxin family protein. Located in the chloroplast. Shows high activity towards the chloroplast 2-Cys peroxiredoxin A, and poor activity towards the chloroplast NADP-malate dehydrogenase.	ATYPICAL CYS HIS RICH THIOREDOXIN 4 (ACHT4); FUNCTIONS IN: oxidoreductase activity, acting on sulfur group of donors, disulfide as acceptor; INVOLVED IN: cell redox homeostasis; LOCATED IN: chloroplast membrane, chloroplast stroma, chloroplast; EXPRESSED IN: 22 plant structures; EXPRESSED DURING: 13 growth stages; CONTAINS InterPro DOMAIN/s: Thioredoxin fold (InterPro:IPR012335), Thioredoxin-like…
AT3G14470	Chr3:4857939-4861247	4.64569	2.95871	-0.650926	0.012152	protein_coding	disease resistance protein (NBS-LRR class), putative		disease resistance protein (NBS-LRR class), putative; FUNCTIONS IN: protein binding, ATP binding; INVOLVED IN: defense response, apoptosis; LOCATED IN: endomembrane system; EXPRESSED IN: 23 plant structures; EXPRESSED DURING: 14 growth stages; CONTAINS InterPro DOMAIN/s: Leucine-rich repeat-containing protein (InterPro:IPR015766), NB-ARC (InterPro:IPR002182), Leucine-rich repeat (InterPro:IPR0016…
AT1G55690	Chr1:20808260-20812840	12.7829	8.13805	-0.651465	0.0175104	protein_coding	SEC14 cytosolic factor family protein / phosphoglyceride transfer family protein		SEC14 cytosolic factor family protein / phosphoglyceride transfer family protein; FUNCTIONS IN: transporter activity; INVOLVED IN: transport; LOCATED IN: cellular_component unknown; EXPRESSED IN: 21 plant structures; EXPRESSED DURING: 13 growth stages; CONTAINS InterPro DOMAIN/s: Cellular retinaldehyde-binding/triple function, C-terminal (InterPro:IPR001251), Cellular retinaldehyde-binding/triple…
AT3G07020	Chr3:2217621-2221702	17.8375	11.3035	-0.658147	0.0153841	protein_coding	UDP-glucose:sterol glucosyltransferase (UGT80A2)		UDP-glucose:sterol glucosyltransferase (UGT80A2); FUNCTIONS IN: transferase activity, transferring glycosyl groups; INVOLVED IN: lipid glycosylation, carbohydrate metabolic process, metabolic process; LOCATED IN: plasma membrane, membrane; EXPRESSED IN: 25 plant structures; EXPRESSED DURING: 15 growth stages; CONTAINS InterPro DOMAIN/s: Glycosyl transferase, family 28 (InterPro:IPR004276), UDP-gl…
AT1G04300	Chr1:1148658-1154652	22.1234	13.9743	-0.662799	0.000144658	protein_coding			FUNCTIONS IN: molecular_function unknown; INVOLVED IN: biological_process unknown; EXPRESSED IN: 24 plant structures; EXPRESSED DURING: 15 growth stages; CONTAINS InterPro DOMAIN/s: TRAF-like (InterPro:IPR008974), MATH (InterPro:IPR002083), TRAF-type (InterPro:IPR013322); BEST Arabidopsis thaliana protein match is: meprin and TRAF homology domain-containing protein / MATH domain-containing protei…
AT4G11360	Chr4:6906013-6906759	45.0552	28.4347	-0.664043	0.00186468	protein_coding	RHA1B; protein binding / zinc ion binding	Encodes a putative RING-H2 finger protein RHA1b.	RHA1B; FUNCTIONS IN: protein binding, zinc ion binding; INVOLVED IN: response to cadmium ion, response to chitin; EXPRESSED IN: 23 plant structures; EXPRESSED DURING: 13 growth stages; CONTAINS InterPro DOMAIN/s: Zinc finger, RING-type (InterPro:IPR001841), Zinc finger, RING/FYVE/PHD-type (InterPro:IPR013083); BEST Arabidopsis thaliana protein match is: RHA1A; protein binding / zinc ion binding (…
AT3G49790	Chr3:18468050-18469763	8.88336	5.60269	-0.664985	0.0121878	protein_coding	ATP binding		ATP binding; FUNCTIONS IN: ATP binding; INVOLVED IN: biological_process unknown; EXPRESSED IN: 21 plant structures; EXPRESSED DURING: 11 growth stages; CONTAINS InterPro DOMAIN/s: ATP-binding region, ATPase-like (InterPro:IPR003594); BEST Arabidopsis thaliana protein match is: carbohydrate binding (TAIR:AT1G10150.1); Has 54 Blast hits to 54 proteins in 8 species: Archae - 0; Bacteria - 0; Metazoa…
AT2G16750	Chr2:7271011-7274693	4.40295	2.77375	-0.66663	0.0290604	protein_coding	protein kinase family protein		protein kinase family protein; FUNCTIONS IN: protein serine/threonine kinase activity, protein kinase activity, kinase activity, ATP binding; INVOLVED IN: protein amino acid phosphorylation; LOCATED IN: endomembrane system; EXPRESSED IN: 18 plant structures; EXPRESSED DURING: 11 growth stages; CONTAINS InterPro DOMAIN/s: Protein kinase, core (InterPro:IPR000719), Serine/threonine protein kinase-r…
AT4G37250	Chr4:17527649-17530506	5.28568	3.3195	-0.671126	0.0110529	protein_coding	leucine-rich repeat family protein / protein kinase family protein		leucine-rich repeat family protein / protein kinase family protein; FUNCTIONS IN: protein serine/threonine kinase activity, kinase activity, ATP binding; INVOLVED IN: transmembrane receptor protein tyrosine kinase signaling pathway, protein amino acid phosphorylation; LOCATED IN: endomembrane system; EXPRESSED IN: 22 plant structures; EXPRESSED DURING: 13 growth stages; CONTAINS InterPro DOMAIN/s…
AT4G30560	Chr4:14926973-14930156	5.23837	3.28739	-0.672176	0.0213527	protein_coding	ATCNGC9 (CYCLIC NUCLEOTIDE GATED CHANNEL 9); calmodulin binding / cyclic nucleotide binding / ion channel	member of Cyclic nucleotide gated channel family	CYCLIC NUCLEOTIDE GATED CHANNEL 9 (ATCNGC9); FUNCTIONS IN: ion channel activity, cyclic nucleotide binding, calmodulin binding; INVOLVED IN: potassium ion transport, ion transport; LOCATED IN: membrane; EXPRESSED IN: 16 plant structures; EXPRESSED DURING: 7 growth stages; CONTAINS InterPro DOMAIN/s: Cyclic nucleotide-binding (InterPro:IPR000595), Cyclic nucleotide-binding, conserved site (InterPr…
AT1G30600	Chr1:10841141-10845050	5.20471	3.2527	-0.678182	0.00963819	protein_coding	subtilase family protein		subtilase family protein; FUNCTIONS IN: identical protein binding, serine-type endopeptidase activity; INVOLVED IN: proteolysis, negative regulation of catalytic activity; LOCATED IN: plant-type cell wall; EXPRESSED IN: 21 plant structures; EXPRESSED DURING: 13 growth stages; CONTAINS InterPro DOMAIN/s: Protease-associated PA (InterPro:IPR003137), Peptidase S8A, DUF1034 C-terminal (InterPro:IPR01…
AT5G65630	Chr5:26221931-26228449	71.4441	44.5912	-0.680057	0.0291094	protein_coding	GTE7 (Global transcription factor group E 7); DNA binding	This gene is predicted to encode a bromodomain-containing protein. Plant lines expressing RNAi constructs targeted against GTE7 show some resistance to agrobacterium-mediated root transformation.	Global transcription factor group E 7 (GTE7); FUNCTIONS IN: DNA binding; INVOLVED IN: DNA mediated transformation; LOCATED IN: cellular_component unknown; EXPRESSED IN: 23 plant structures; EXPRESSED DURING: 14 growth stages; CONTAINS InterPro DOMAIN/s: Bromodomain (InterPro:IPR001487); BEST Arabidopsis thaliana protein match is: GTE2 (Global transcription factor group E 2); DNA binding (TAIR:AT5…
AT5G60210	Chr5:24243082-24245968	16.3554	10.1969	-0.681633	0.000625918	protein_coding			LOCATED IN: plasma membrane; EXPRESSED IN: 22 plant structures; EXPRESSED DURING: 12 growth stages; BEST Arabidopsis thaliana protein match is: myosin heavy chain-related (TAIR:AT2G37080.1); Has 77946 Blast hits to 39215 proteins in 1793 species: Archae - 845; Bacteria - 8877; Metazoa - 39997; Fungi - 6049; Plants - 2988; Viruses - 248; Other Eukaryotes - 18942 (source: NCBI BLink).
AT4G08310	Chr4:5248863-5252150	21.7481	13.5378	-0.683902	0.000596305	protein_coding	unknown protein		unknown protein; FUNCTIONS IN: molecular_function unknown; INVOLVED IN: biological_process unknown; LOCATED IN: cellular_component unknown; EXPRESSED IN: 25 plant structures; EXPRESSED DURING: 13 growth stages; BEST Arabidopsis thaliana protein match is: unknown protein (TAIR:AT1G44780.2); Has 49375 Blast hits to 29075 proteins in 1129 species: Archae - 121; Bacteria - 2824; Metazoa - 24551; Fung…
AT3G49650	Chr3:18405007-18409709	4.82914	3.0056	-0.684113	0.00962006	protein_coding	kinesin motor protein-related		kinesin motor protein-related; FUNCTIONS IN: microtubule motor activity, ATP binding; INVOLVED IN: microtubule-based movement; LOCATED IN: microtubule associated complex; EXPRESSED IN: 22 plant structures; EXPRESSED DURING: 13 growth stages; CONTAINS InterPro DOMAIN/s: Kinesin, motor region (InterPro:IPR001752); BEST Arabidopsis thaliana protein match is: ATP binding / microtubule motor (TAIR:AT1…
AT3G54670	Chr3:20235677-20243960	13.9723	8.68825	-0.685429	0.000677211	protein_coding	TTN8 (TITAN8); ATP binding / transporter	cohesin	TITAN8 (TTN8); FUNCTIONS IN: transporter activity, ATP binding; INVOLVED IN: chromosome segregation, chromosome organization; LOCATED IN: cohesin complex, nucleus, chloroplast; EXPRESSED IN: 25 plant structures; EXPRESSED DURING: 14 growth stages; CONTAINS InterPro DOMAIN/s: SMCs flexible hinge (InterPro:IPR010935), RecF/RecN/SMC protein, N-terminal (InterPro:IPR003395); BEST Arabidopsis thaliana…
AT3G54140	Chr3:20045662-20048572	18.6067	11.5527	-0.687587	0.000408881	protein_coding	PTR1 (PEPTIDE TRANSPORTER 1); dipeptide transporter/ transporter/ tripeptide transporter	Encodes a di- and tri-peptide transporter that recognizes a variety of different amino acid combinations. GFP-tagged PTR1 localizes to the plasma membrane and has 8 to 11 predicted transmembrane domains. PTR1 is expressed in a number of different vascular tissues throughout the plant based on promoter:GUS expression analysis. ptr1 mutants have a lower dry weight than wild type plants when both ar…	PEPTIDE TRANSPORTER 1 (PTR1); FUNCTIONS IN: dipeptide transporter activity, tripeptide transporter activity, transporter activity; INVOLVED IN: dipeptide transport, oligopeptide transport, nitrogen compound metabolic process, tripeptide transport; LOCATED IN: plasma membrane, membrane; EXPRESSED IN: 40 plant structures; EXPRESSED DURING: 10 growth stages; CONTAINS InterPro DOMAIN/s: TGF-beta rece…
AT5G22940	Chr5:7676937-7679179	5.81758	3.61157	-0.687792	0.0215702	protein_coding	F8H (FRA8 HOMOLOG); catalytic	Homolog of FRA8 (AT2G28110), a member of a member of glycosyltransferase family 47; exhibits high sequence similarity to tobacco (Nicotiana plumbaginifolia) pectin glucuronyltransferase.	FRA8 HOMOLOG (F8H); FUNCTIONS IN: catalytic activity; INVOLVED IN: glucuronoxylan biosynthetic process; LOCATED IN: Golgi apparatus, membrane; EXPRESSED IN: 24 plant structures; EXPRESSED DURING: 16 growth stages; CONTAINS InterPro DOMAIN/s: Exostosin-like (InterPro:IPR004263); BEST Arabidopsis thaliana protein match is: FRA8 (FRAGILE FIBER 8); glucuronosyltransferase/ transferase (TAIR:AT2G28110…
AT5G43270	Chr5:17360286-17363773	22.7568	14.0316	-0.697616	0.00575446	protein_coding	SPL2 (SQUAMOSA PROMOTER BINDING PROTEIN-LIKE 2); DNA binding / transcription factor	member of the SPL (squamosa-promoter binding protein-like) gene family, a novel gene family encoding DNA binding proteins and putative transcription factors. The genes are characterized by the presence of the SBP-box, which encodes a protein domain, the	SQUAMOSA PROMOTER BINDING PROTEIN-LIKE 2 (SPL2); FUNCTIONS IN: transcription factor activity, DNA binding; INVOLVED IN: regulation of transcription; LOCATED IN: nucleus; EXPRESSED IN: 22 plant structures; EXPRESSED DURING: 13 growth stages; CONTAINS InterPro DOMAIN/s: Transcription factor, SBP-box (InterPro:IPR004333); BEST Arabidopsis thaliana protein match is: squamosa promoter-binding protein-…
AT5G06270	Chr5:1912549-1913674	11.215	6.91398	-0.69784	0.0243573	protein_coding	unknown protein		unknown protein; FUNCTIONS IN: molecular_function unknown; INVOLVED IN: biological_process unknown; LOCATED IN: chloroplast; EXPRESSED IN: 21 plant structures; EXPRESSED DURING: 11 growth stages; BEST Arabidopsis thaliana protein match is: unknown protein (TAIR:AT3G11600.1); Has 108 Blast hits to 108 proteins in 10 species: Archae - 0; Bacteria - 0; Metazoa - 0; Fungi - 0; Plants - 108; Viruses -…
AT2G02780	Chr2:781846-784646	7.69682	4.73854	-0.69982	0.00416896	protein_coding	leucine-rich repeat transmembrane protein kinase, putative		leucine-rich repeat transmembrane protein kinase, putative; FUNCTIONS IN: protein serine/threonine kinase activity, protein kinase activity, ATP binding; INVOLVED IN: transmembrane receptor protein tyrosine kinase signaling pathway, protein amino acid phosphorylation; LOCATED IN: endomembrane system; EXPRESSED IN: 22 plant structures; EXPRESSED DURING: 13 growth stages; CONTAINS InterPro DOMAIN/s…
AT3G19050	Chr3:6578046-6590188	3.7527	2.30581	-0.702658	0.000924915	protein_coding	POK2 (PHRAGMOPLAST ORIENTING KINESIN 2); ATP binding / microtubule motor	PHRAGMOPLAST ORIENTING KINESIN 2 is one of the two Arabidopsis homologs isolated in yeast two-hybrid screen for interaction partners of maize gene TANGLED1 (TAN1). Based on sequence homology in their motor domains, POK1 and POK2 belong to the kinesin-12 class which also includes the well-characterized group of phragmoplast-associated kinesins AtPAKRPs. Both kinesins are composed of an N-terminal …	PHRAGMOPLAST ORIENTING KINESIN 2 (POK2); FUNCTIONS IN: microtubule motor activity, ATP binding; INVOLVED IN: cytokinesis; LOCATED IN: microtubule associated complex; EXPRESSED IN: root vascular system, primary root tip, lateral root primordium; CONTAINS InterPro DOMAIN/s: Kinesin-related (InterPro:IPR010544), Kinesin, motor region (InterPro:IPR001752); BEST Arabidopsis thaliana protein match is: …
AT1G26920	Chr1:9329511-9330398	65.2423	40.0253	-0.704896	0.000140479	protein_coding	unknown protein		unknown protein; FUNCTIONS IN: molecular_function unknown; INVOLVED IN: biological_process unknown; LOCATED IN: cellular_component unknown; EXPRESSED IN: 23 plant structures; EXPRESSED DURING: 13 growth stages; BEST Arabidopsis thaliana protein match is: unknown protein (TAIR:AT1G69760.1); Has 28 Blast hits to 28 proteins in 9 species: Archae - 0; Bacteria - 0; Metazoa - 0; Fungi - 6; Plants - 16…
AT5G59000	Chr5:23818753-23820237	19.5314	11.9803	-0.705127	0.0065035	protein_coding	zinc finger (C3HC4-type RING finger) family protein		zinc finger (C3HC4-type RING finger) family protein; FUNCTIONS IN: protein binding, zinc ion binding; INVOLVED IN: biological_process unknown; LOCATED IN: cellular_component unknown; EXPRESSED IN: 21 plant structures; EXPRESSED DURING: 13 growth stages; CONTAINS InterPro DOMAIN/s: Zinc finger, RING/FYVE/PHD-type (InterPro:IPR013083), Zinc finger, RING-CH-type (InterPro:IPR011016); BEST Arabidopsi…
AT5G10250	Chr5:3217027-3219368	4.95631	3.0394	-0.705478	0.0357947	protein_coding	DOT3 (DEFECTIVELY ORGANIZED TRIBUTARIES 3); protein binding / signal transducer	Encodes a protein with an N-terminal BTB/POZ domain and a C-terminal NPH3 family domain. dot3 mutants have defects in shoot and primary root growth and produce an aberrant parallel venation pattern in juvenile leaves.	DEFECTIVELY ORGANIZED TRIBUTARIES 3 (DOT3); FUNCTIONS IN: protein binding, signal transducer activity; INVOLVED IN: in 6 processes; LOCATED IN: cellular_component unknown; EXPRESSED IN: leaf primordium; CONTAINS InterPro DOMAIN/s: NPH3 (InterPro:IPR004249), BTB/POZ fold (InterPro:IPR011333), BTB/POZ-like (InterPro:IPR000210); BEST Arabidopsis thaliana protein match is: NPH3 (NON-PHOTOTROPIC HYPOC…
AT3G15400	Chr3:5201643-5203197	8.45078	5.18144	-0.705733	0.0161717	protein_coding	ATA20	Encodes a protein with novel repeat sequences and a glycine-rich domain which has a 53% identity to GRP1, a petunia glycine-rich cell wall protein.	ATA20; FUNCTIONS IN: molecular_function unknown; INVOLVED IN: biological_process unknown; LOCATED IN: plant-type cell wall; EXPRESSED IN: 8 plant structures; EXPRESSED DURING: 4 anthesis, petal differentiation and expansion stage, E expanded cotyledon stage; Has 77171 Blast hits to 19711 proteins in 1301 species: Archae - 97; Bacteria - 27924; Metazoa - 20901; Fungi - 4266; Plants - 6864; Viruses…
AT2G02850	Chr2:826403-827812	14.0778	8.6171	-0.708153	0.0466445	protein_coding	ARPN (PLANTACYANIN); copper ion binding / electron carrier	Encodes plantacyanin one of blue copper proteins. Involved in anther development and pollination. Expressed in the transmitting tract of the pistil.	PLANTACYANIN (ARPN); FUNCTIONS IN: electron carrier activity, copper ion binding; INVOLVED IN: anther development, pollination; LOCATED IN: middle lamella-containing extracellular matrix, apoplast; EXPRESSED IN: 21 plant structures; EXPRESSED DURING: 9 growth stages; CONTAINS InterPro DOMAIN/s: Plastocyanin-like (InterPro:IPR003245), Cupredoxin (InterPro:IPR008972), Blue (type 1) copper domain (I…
AT2G46630	Chr2:19145528-19146713	9.78264	5.98356	-0.709219	0.0216841	protein_coding	unknown protein		unknown protein; LOCATED IN: chloroplast; EXPRESSED IN: 22 plant structures; EXPRESSED DURING: 13 growth stages.
AT5G44060	Chr5:17731004-17731905	11.6443	7.1144	-0.710804	0.0331127	protein_coding	unknown protein		unknown protein; FUNCTIONS IN: molecular_function unknown; INVOLVED IN: biological_process unknown; LOCATED IN: cellular_component unknown; EXPRESSED IN: 23 plant structures; EXPRESSED DURING: 15 growth stages; BEST Arabidopsis thaliana protein match is: unknown protein (TAIR:AT1G04000.1); Has 36 Blast hits to 36 proteins in 5 species: Archae - 0; Bacteria - 0; Metazoa - 0; Fungi - 0; Plants - 36…
AT5G02500	Chr5:553744-556442	854.358	521.854	-0.711195	0.00259548	protein_coding	HSC70-1 (HEAT SHOCK COGNATE PROTEIN 70-1); ATP binding	encodes a member of heat shock protein 70 family.	HEAT SHOCK COGNATE PROTEIN 70-1 (HSC70-1); FUNCTIONS IN: ATP binding; INVOLVED IN: protein folding, response to cadmium ion, response to virus, response to cold, response to heat; LOCATED IN: in 9 components; EXPRESSED IN: 29 plant structures; EXPRESSED DURING: 16 growth stages; CONTAINS InterPro DOMAIN/s: Heat shock protein 70, conserved site (InterPro:IPR018181), Heat shock protein Hsp70 (Inter…
AT4G19110	Chr4:10454496-10459328	105.408	64.3511	-0.711949	0.00214521	protein_coding	protein kinase, putative		protein kinase, putative; FUNCTIONS IN: protein serine/threonine kinase activity, protein kinase activity, kinase activity, ATP binding; INVOLVED IN: protein amino acid phosphorylation; LOCATED IN: cellular_component unknown; EXPRESSED IN: sperm cell, male gametophyte, pollen tube; EXPRESSED DURING: L mature pollen stage, M germinated pollen stage; CONTAINS InterPro DOMAIN/s: Protein kinase, ATP …
AT2G28940	Chr2:12426709-12428730	15.4718	9.43534	-0.713499	0.033939	protein_coding	protein kinase family protein		protein kinase family protein; FUNCTIONS IN: protein kinase activity, kinase activity, ATP binding; INVOLVED IN: protein amino acid phosphorylation; LOCATED IN: endomembrane system; EXPRESSED IN: 19 plant structures; EXPRESSED DURING: 13 growth stages; CONTAINS InterPro DOMAIN/s: Protein kinase, core (InterPro:IPR000719), Serine/threonine protein kinase-related (InterPro:IPR017442), Protein kinas…
AT4G37550	Chr4:17643580-17645830	23.763	14.4821	-0.714452	0.000469835	protein_coding	formamidase, putative / formamide amidohydrolase, putative		formamidase, putative / formamide amidohydrolase, putative; FUNCTIONS IN: formamidase activity, hydrolase activity, acting on carbon-nitrogen (but not peptide) bonds, in linear amides; INVOLVED IN: metabolic process; LOCATED IN: vacuole; EXPRESSED IN: 23 plant structures; EXPRESSED DURING: 13 growth stages; CONTAINS InterPro DOMAIN/s: Acetamidase/Formamidase (InterPro:IPR004304); BEST Arabidopsis…
AT3G04030	Chr3:1042881-1044698	7.07492	4.31148	-0.714529	0.0351246	protein_coding	myb family transcription factor		myb family transcription factor; FUNCTIONS IN: transcription factor activity; INVOLVED IN: regulation of transcription; EXPRESSED IN: 9 plant structures; EXPRESSED DURING: 4 anthesis, 4 leaf senescence stage, petal differentiation and expansion stage; CONTAINS InterPro DOMAIN/s: Homeodomain-like (InterPro:IPR009057), Myb, DNA-binding (InterPro:IPR014778), Myb-type HTH DNA-binding domain (InterPro…
AT4G16146	Chr4:9142403-9144583	131.416	79.8211	-0.719302	4.46e-05	protein_coding			FUNCTIONS IN: molecular_function unknown; INVOLVED IN: biological_process unknown; LOCATED IN: cellular_component unknown; EXPRESSED IN: 24 plant structures; EXPRESSED DURING: 13 growth stages; CONTAINS InterPro DOMAIN/s: Lg106-like (InterPro:IPR012482); BEST Arabidopsis thaliana protein match is: unknown protein (TAIR:AT1G69510.3); Has 94 Blast hits to 94 proteins in 12 species: Archae - 0; Bact…
AT5G67370	Chr5:26877552-26879542	88.7647	53.8257	-0.721689	2.57e-05	protein_coding	unknown protein		unknown protein; FUNCTIONS IN: molecular_function unknown; INVOLVED IN: biological_process unknown; EXPRESSED IN: 21 plant structures; EXPRESSED DURING: 13 growth stages; CONTAINS InterPro DOMAIN/s: Protein of unknown function DUF1230 (InterPro:IPR009631); BEST Arabidopsis thaliana protein match is: unknown protein (TAIR:AT5G11840.1); Has 264 Blast hits to 264 proteins in 69 species: Archae - 0; …
AT3G22425	Chr3:7951054-7953223	15.6362	9.46355	-0.724438	0.00440628	protein_coding	IGPD; imidazoleglycerol-phosphate dehydratase	Encodes imidazoleglycerolphosphate dehydratase.	IGPD; FUNCTIONS IN: imidazoleglycerol-phosphate dehydratase activity; INVOLVED IN: histidine biosynthetic process; LOCATED IN: chloroplast; EXPRESSED IN: 22 plant structures; EXPRESSED DURING: 13 growth stages; CONTAINS InterPro DOMAIN/s: Imidazole glycerol-phosphate dehydratase (InterPro:IPR000807); BEST Arabidopsis thaliana protein match is: imidazoleglycerol-phosphate dehydratase, putative (TA…
AT5G66310	Chr5:26485684-26491382	6.02363	3.64533	-0.724584	0.00119523	protein_coding	kinesin motor family protein		kinesin motor family protein; FUNCTIONS IN: microtubule motor activity, ATP binding; INVOLVED IN: microtubule-based movement; LOCATED IN: microtubule associated complex; EXPRESSED IN: 22 plant structures; EXPRESSED DURING: 15 growth stages; CONTAINS InterPro DOMAIN/s: Kinesin, motor region (InterPro:IPR001752); BEST Arabidopsis thaliana protein match is: kinesin motor family protein (TAIR:AT3G511…
AT4G14746	Chr4:8462613-8464326	15.5627	9.41169	-0.725564	0.0270736	protein_coding			INVOLVED IN: biological_process unknown; LOCATED IN: anchored to membrane; CONTAINS InterPro DOMAIN/s: EGF (InterPro:IPR006210); Has 201 Blast hits to 179 proteins in 41 species: Archae - 0; Bacteria - 0; Metazoa - 168; Fungi - 0; Plants - 31; Viruses - 0; Other Eukaryotes - 2 (source: NCBI BLink).
AT1G55180	Chr1:20585056-20587629	3.19912	1.92851	-0.730186	0.047022	protein_coding	PLDEPSILON (PHOSPHOLIPASE D ALPHA 4); phospholipase D	member of C2-PLD. subfamily Represents a phospholipase D (PLD) gene with four exons, hence it is a member of the alpha class. Its amino acid sequence is quite different from other PLDs, therefore it might possess unique structural and/or catalytic properties.	PHOSPHOLIPASE D ALPHA 4 (PLDEPSILON); FUNCTIONS IN: phospholipase D activity; INVOLVED IN: in 10 processes; LOCATED IN: plasma membrane; EXPRESSED IN: 6 plant structures; EXPRESSED DURING: petal differentiation and expansion stage; CONTAINS InterPro DOMAIN/s: C2 membrane targeting protein (InterPro:IPR018029), C2 calcium/lipid-binding region, CaLB (InterPro:IPR008973), Phospholipase D (InterPro:I…
AT5G24980	Chr5:8609080-8609528	49.4199	29.7143	-0.733936	0.0371705	protein_coding	unknown protein		unknown protein; FUNCTIONS IN: molecular_function unknown; INVOLVED IN: biological_process unknown; LOCATED IN: endomembrane system; BEST Arabidopsis thaliana protein match is: unknown protein (TAIR:AT5G10745.1); Has 23 Blast hits to 23 proteins in 6 species: Archae - 0; Bacteria - 0; Metazoa - 0; Fungi - 0; Plants - 23; Viruses - 0; Other Eukaryotes - 0 (source: NCBI BLink).
AT1G09290	Chr1:3001516-3008213	10.7589	6.45979	-0.735974	0.0240456	protein_coding	unknown protein		unknown protein; FUNCTIONS IN: molecular_function unknown; INVOLVED IN: biological_process unknown; LOCATED IN: cellular_component unknown; EXPRESSED IN: 11 plant structures; EXPRESSED DURING: 6 growth stages; Has 42 Blast hits to 42 proteins in 14 species: Archae - 0; Bacteria - 0; Metazoa - 4; Fungi - 6; Plants - 30; Viruses - 0; Other Eukaryotes - 2 (source: NCBI BLink).
AT1G06490	Chr1:1978761-1989046	1.20245	0.721773	-0.736355	0.0441604	protein_coding	ATGSL07 (glucan synthase-like 7); 1,3-beta-glucan synthase/ transferase, transferring glycosyl groups	encodes a gene similar to callose synthase	glucan synthase-like 7 (ATGSL07); FUNCTIONS IN: transferase activity, transferring glycosyl groups, 1,3-beta-glucan synthase activity; INVOLVED IN: 1,3-beta-glucan biosynthetic process; LOCATED IN: 1,3-beta-glucan synthase complex, membrane; EXPRESSED IN: 20 plant structures; EXPRESSED DURING: 13 growth stages; CONTAINS InterPro DOMAIN/s: Glycosyl transferase, family 48 (InterPro:IPR003440); BEST…
AT1G26820	Chr1:9292445-9293784	7.90498	4.74391	-0.736685	0.0452214	protein_coding	RNS3 (RIBONUCLEASE 3); RNA binding / endoribonuclease/ ribonuclease T2	Encodes ribonuclease RNS3.	RIBONUCLEASE 3 (RNS3); FUNCTIONS IN: ribonuclease T2 activity, endoribonuclease activity, RNA binding; INVOLVED IN: aging; LOCATED IN: endomembrane system; EXPRESSED IN: 21 plant structures; EXPRESSED DURING: 12 growth stages; CONTAINS InterPro DOMAIN/s: Ribonuclease T2 (InterPro:IPR001568), Ribonuclease T2, active site (InterPro:IPR018188); BEST Arabidopsis thaliana protein match is: ribonucleas…
AT3G50240	Chr3:18623261-18628888	17.1593	10.2707	-0.740456	4.53e-05	protein_coding	KICP-02; ATP binding / microtubule motor	Encodes a kinesin-related protein.	KICP-02; FUNCTIONS IN: microtubule motor activity, ATP binding; INVOLVED IN: microtubule-based movement; LOCATED IN: microtubule associated complex, chloroplast; EXPRESSED IN: 20 plant structures; EXPRESSED DURING: 13 growth stages; CONTAINS InterPro DOMAIN/s: Kinesin, motor region (InterPro:IPR001752); BEST Arabidopsis thaliana protein match is: FRA1 (FRAGILE FIBER 1); microtubule motor (TAIR:AT…
AT2G30460	Chr2:12976145-12978868	11.2077	6.67358	-0.747954	0.0219302	protein_coding			FUNCTIONS IN: molecular_function unknown; INVOLVED IN: biological_process unknown; LOCATED IN: endomembrane system, membrane; EXPRESSED IN: 24 plant structures; EXPRESSED DURING: 15 growth stages; CONTAINS InterPro DOMAIN/s: Protein of unknown function DUF250 (InterPro:IPR004853); BEST Arabidopsis thaliana protein match is: transporter-related (TAIR:AT1G06890.2); Has 782 Blast hits to 581 protein…
AT1G47270	Chr1:17326555-17328728	7.74134	4.60798	-0.748448	0.00867813	protein_coding	AtTLP6 (TUBBY LIKE PROTEIN 6); phosphoric diester hydrolase/ transcription factor	Member of TLP family	TUBBY LIKE PROTEIN 6 (AtTLP6); FUNCTIONS IN: transcription factor activity, phosphoric diester hydrolase activity; INVOLVED IN: regulation of transcription; LOCATED IN: cellular_component unknown; EXPRESSED IN: 24 plant structures; EXPRESSED DURING: 15 growth stages; CONTAINS InterPro DOMAIN/s: Cyclin-like F-box (InterPro:IPR001810), Tubby, C-terminal, conserved site (InterPro:IPR018066), Tubby, …
AT1G78590	Chr1:29564248-29566375	11.626	6.91853	-0.748817	0.00592328	protein_coding	NADK3 (NAD(H) KINASE 3); NAD+ kinase/ NADH kinase	Encodes a NADH kinase which can synthesize NADPH from NADH; also utilizes NAD+ as substrate although NADH is the preferred substrate.	NAD(H) KINASE 3 (NADK3); FUNCTIONS IN: NAD+ kinase activity, NADH kinase activity; INVOLVED IN: NADP biosynthetic process, pyridine nucleotide biosynthetic process; LOCATED IN: cytosol, cytoplasm; EXPRESSED IN: 6 plant structures; CONTAINS InterPro DOMAIN/s: ATP-NAD kinase, PpnK-type, alpha/beta (InterPro:IPR017438), ATP-NAD kinase, PpnK-type (InterPro:IPR016064), ATP-NAD/AcoX kinase (InterPro:IP…
AT5G03150	Chr5:745643-749007	5.38293	3.18903	-0.755276	0.0131785	protein_coding	JKD (JACKDAW); nucleic acid binding / protein binding / protein homodimerization/ transcription factor/ zinc ion binding	JKD is a nuclear-localized putative transcription factor with three zinc finger domains. jkd mutants show a number of root patterning defects including ectopic periclinal divisions in the cortex, increased cell numbers in the cortical and epidermal layers, a disrupted QC marker expression pattern, and disorganized QC and columella cells. jkd mutants also have a reduced number of meristematic cell…	JACKDAW (JKD); FUNCTIONS IN: protein binding, transcription factor activity, protein homodimerization activity, zinc ion binding, nucleic acid binding; INVOLVED IN: regulation of meristem growth, regulation of cell division, root development, regulation of transcription; LOCATED IN: intracellular; EXPRESSED IN: 6 plant structures; EXPRESSED DURING: 6 growth stages; CONTAINS InterPro DOMAIN/s: Zin…
AT4G17695	Chr4:9848031-9850704	6.79117	3.99876	-0.764107	0.0494875	protein_coding	KAN3 (KANADI 3); DNA binding / transcription factor		KANADI 3 (KAN3); FUNCTIONS IN: transcription factor activity, DNA binding; INVOLVED IN: regulation of transcription; EXPRESSED IN: 21 plant structures; EXPRESSED DURING: 10 growth stages; CONTAINS InterPro DOMAIN/s: Homeodomain-like (InterPro:IPR009057), Myb, DNA-binding (InterPro:IPR014778), Myb-like DNA-binding region, SHAQKYF class (InterPro:IPR006447), Homeodomain-related (InterPro:IPR012287)…
AT1G79500	Chr1:29903419-29909988	21.594	12.7	-0.765798	0.0248286	protein_coding	2-dehydro-3-deoxyphosphooctonate aldolase / phospho-2-dehydro-3-deoxyoctonate aldolase / 3-deoxy-D-manno-octulosonic acid 8-phosphate synthetase (KDSA)	Encodes a protein with 3-deoxy-8-phosphooctulonate synthase (KDOP synthase) activity which is involved in the biosynthesis of KDO, a component of cell wall rhamnogalacturonan II.	AtkdsA1; FUNCTIONS IN: 3-deoxy-8-phosphooctulonate synthase activity; INVOLVED IN: rhamnogalacturonan II biosynthetic process, metabolic process; LOCATED IN: endomembrane system, cytoplasm; EXPRESSED IN: 22 plant structures; EXPRESSED DURING: 13 growth stages; CONTAINS InterPro DOMAIN/s: DAHP synthetase I/KDSA (InterPro:IPR006218), Aldolase-type TIM barrel (InterPro:IPR013785), 3-deoxy-8-phosphoo…
AT5G04950	Chr5:1457644-1458890	9.94141	5.82252	-0.771807	0.00995697	protein_coding	NAS1 (NICOTIANAMINE SYNTHASE 1); nicotianamine synthase	Encodes a nicotianamide synthase.	NICOTIANAMINE SYNTHASE 1 (NAS1); FUNCTIONS IN: nicotianamine synthase activity; INVOLVED IN: response to salt stress, nicotianamine biosynthetic process; EXPRESSED IN: 15 plant structures; EXPRESSED DURING: 9 growth stages; CONTAINS InterPro DOMAIN/s: Nicotianamine synthase (InterPro:IPR004298); BEST Arabidopsis thaliana protein match is: NAS2 (NICOTIANAMINE SYNTHASE 2); nicotianamine synthase (T…
AT1G19835	Chr1:6855951-6860332	28.799	16.8516	-0.77313	5.71e-06	protein_coding	unknown protein		unknown protein; FUNCTIONS IN: molecular_function unknown; INVOLVED IN: biological_process unknown; LOCATED IN: plasma membrane; EXPRESSED IN: 22 plant structures; EXPRESSED DURING: 13 growth stages; CONTAINS InterPro DOMAIN/s: Protein of unknown function DUF869, plant (InterPro:IPR008587); BEST Arabidopsis thaliana protein match is: unknown protein (TAIR:AT1G47900.1); Has 44906 Blast hits to 237…
AT1G80850	Chr1:30383690-30387522	8.69082	5.07763	-0.775337	0.0218122	protein_coding	methyladenine glycosylase family protein		methyladenine glycosylase family protein; FUNCTIONS IN: DNA-3-methyladenine glycosylase I activity, catalytic activity; INVOLVED IN: DNA repair, base-excision repair; LOCATED IN: cellular_component unknown; EXPRESSED IN: 22 plant structures; EXPRESSED DURING: 13 growth stages; CONTAINS InterPro DOMAIN/s: DNA glycosylase (InterPro:IPR011257), Methyladenine glycosylase (InterPro:IPR005019); BEST Ar…
AT2G25220	Chr2:10742713-10745594	5.52584	3.22205	-0.778215	0.0285837	protein_coding	ATP binding / kinase/ protein kinase/ protein serine/threonine kinase/ protein tyrosine kinase		ATP binding / kinase/ protein kinase/ protein serine/threonine kinase/ protein tyrosine kinase; FUNCTIONS IN: protein serine/threonine kinase activity, protein tyrosine kinase activity, protein kinase activity, kinase activity, ATP binding; INVOLVED IN: protein amino acid phosphorylation; EXPRESSED IN: 8 plant structures; EXPRESSED DURING: LP.06 six leaves visible, 4 anthesis, petal differentiati…
AT5G15070	Chr5:4876514-4885821	1.7654	1.02524	-0.78403	0.0445409	protein_coding	acid phosphatase/ oxidoreductase/ transition metal ion binding		acid phosphatase/ oxidoreductase/ transition metal ion binding; FUNCTIONS IN: oxidoreductase activity, transition metal ion binding, acid phosphatase activity; LOCATED IN: cellular_component unknown; EXPRESSED IN: 6 plant structures; EXPRESSED DURING: 4 anthesis, F mature embryo stage, petal differentiation and expansion stage, D bilateral stage, E expanded cotyledon stage; CONTAINS InterPro DOMA…
AT1G12420	Chr1:4226361-4229138	10.8199	6.2611	-0.789204	0.000879414	protein_coding	ACR8; amino acid binding		ACR8; FUNCTIONS IN: amino acid binding; INVOLVED IN: response to abscisic acid stimulus; LOCATED IN: cellular_component unknown; CONTAINS InterPro DOMAIN/s: Amino acid-binding ACT (InterPro:IPR002912); BEST Arabidopsis thaliana protein match is: ACR7; amino acid binding (TAIR:AT4G22780.1); Has 1348 Blast hits to 957 proteins in 236 species: Archae - 0; Bacteria - 683; Metazoa - 0; Fungi - 0; Plan…
AT5G57970	Chr5:23466717-23469015	4.37079	2.52846	-0.789632	0.0400764	protein_coding	methyladenine glycosylase family protein		methyladenine glycosylase family protein; FUNCTIONS IN: DNA-3-methyladenine glycosylase I activity, catalytic activity; INVOLVED IN: DNA repair, base-excision repair; EXPRESSED IN: 10 plant structures; EXPRESSED DURING: 6 growth stages; CONTAINS InterPro DOMAIN/s: DNA glycosylase (InterPro:IPR011257), Methyladenine glycosylase (InterPro:IPR005019); BEST Arabidopsis thaliana protein match is: meth…
AT1G15410	Chr1:5298323-5301412	6.67082	3.83683	-0.797948	0.00231203	protein_coding	aspartate-glutamate racemase family		aspartate-glutamate racemase family; FUNCTIONS IN: racemase and epimerase activity, acting on amino acids and derivatives; INVOLVED IN: amino acid metabolic process, metabolic process; LOCATED IN: chloroplast; EXPRESSED IN: 22 plant structures; EXPRESSED DURING: 13 growth stages; CONTAINS InterPro DOMAIN/s: Asp/Glu/hydantoin racemase (InterPro:IPR015942), Aspartate racemase (InterPro:IPR004380), …
AT5G65390	Chr5:26128583-26129338	17.0106	9.74636	-0.803498	0.0104169	protein_coding	AGP7		AGP7; LOCATED IN: anchored to membrane; EXPRESSED IN: 18 plant structures; EXPRESSED DURING: 12 growth stages; Has 67907 Blast hits to 26759 proteins in 1358 species: Archae - 408; Bacteria - 17588; Metazoa - 17399; Fungi - 6154; Plants - 9463; Viruses - 2368; Other Eukaryotes - 14527 (source: NCBI BLink).
AT1G73450	Chr1:27613855-27618897	3.27547	1.8742	-0.805425	0.00472816	protein_coding	protein kinase, putative		protein kinase, putative; FUNCTIONS IN: protein serine/threonine kinase activity, protein tyrosine kinase activity, protein kinase activity, kinase activity, ATP binding; INVOLVED IN: protein amino acid phosphorylation; LOCATED IN: cytosol, plasma membrane; EXPRESSED IN: cultured cell; CONTAINS InterPro DOMAIN/s: Protein kinase, core (InterPro:IPR000719), Serine/threonine protein kinase (InterPro…
AT3G63300	Chr3:23384987-23387842	4.11786	2.35231	-0.807812	0.032223	protein_coding	phosphoinositide binding		phosphoinositide binding; FUNCTIONS IN: phosphoinositide binding; INVOLVED IN: signal transduction; EXPRESSED IN: 12 plant structures; EXPRESSED DURING: 6 growth stages; CONTAINS InterPro DOMAIN/s: Pleckstrin-like, plant (InterPro:IPR013666), Protein of unknown function DUF828, plant (InterPro:IPR008546); BEST Arabidopsis thaliana protein match is: phosphoinositide binding (TAIR:AT3G22810.1); Has…
AT4G23900	Chr4:12424450-12426528	7.3998	4.22331	-0.809113	0.0411685	protein_coding	nucleoside diphosphate kinase 4 (NDK4)		nucleoside diphosphate kinase 4 (NDK4); FUNCTIONS IN: nucleoside diphosphate kinase activity, ATP binding; INVOLVED IN: UTP biosynthetic process, GTP biosynthetic process, CTP biosynthetic process; LOCATED IN: mitochondrion; EXPRESSED IN: 24 plant structures; EXPRESSED DURING: 15 growth stages; CONTAINS InterPro DOMAIN/s: Nucleoside diphosphate kinase, core (InterPro:IPR001564); BEST Arabidopsis …
AT3G52910	Chr3:19616020-19618449	9.53396	5.42945	-0.812269	0.00351838	protein_coding	AtGRF4 (GROWTH-REGULATING FACTOR 4); transcription activator	Growth regulating factor encoding transcription activator. One of the nine members of a GRF gene family, containing nuclear targeting domain. Involved in leaf development and expressed in root, shoot and flower.	GROWTH-REGULATING FACTOR 4 (AtGRF4); FUNCTIONS IN: transcription activator activity; INVOLVED IN: leaf development; LOCATED IN: nucleus; EXPRESSED IN: apical meristem, flower, root; CONTAINS InterPro DOMAIN/s: Glutamine-Leucine-Glutamine, QLQ (InterPro:IPR014978), WRC (InterPro:IPR014977); BEST Arabidopsis thaliana protein match is: AtGRF3 (GROWTH-REGULATING FACTOR 3); transcription activator (TA…
AT1G80690	Chr1:30329067-30330803	5.93374	3.3745	-0.814268	0.0391114	protein_coding	unknown protein		unknown protein; FUNCTIONS IN: molecular_function unknown; INVOLVED IN: biological_process unknown; LOCATED IN: cellular_component unknown; EXPRESSED IN: 19 plant structures; EXPRESSED DURING: 13 growth stages; CONTAINS InterPro DOMAIN/s: Protein of unknown function DUF862, eukaryotic (InterPro:IPR008580); BEST Arabidopsis thaliana protein match is: unknown protein (TAIR:AT5G25170.1); Has 554 Bla…
AT1G69780	Chr1:26258938-26260751	16.2833	9.24912	-0.816001	0.000392876	protein_coding	ATHB13; DNA binding / sequence-specific DNA binding / transcription factor	Encodes a homeodomain leucine zipper class I (HD-Zip I) protein.	ATHB13; FUNCTIONS IN: transcription factor activity, sequence-specific DNA binding, DNA binding; INVOLVED IN: cotyledon morphogenesis, regulation of transcription, DNA-dependent, response to sucrose stimulus, leaf morphogenesis; LOCATED IN: nucleus; EXPRESSED IN: 22 plant structures; EXPRESSED DURING: 13 growth stages; CONTAINS InterPro DOMAIN/s: Homeobox, conserved site (InterPro:IPR017970), Hom…
AT4G36470	Chr4:17215026-17216530	5.99044	3.39227	-0.820413	0.029259	protein_coding	S-adenosyl-L-methionine:carboxyl methyltransferase family protein		S-adenosyl-L-methionine:carboxyl methyltransferase family protein; FUNCTIONS IN: S-adenosylmethionine-dependent methyltransferase activity; INVOLVED IN: biological_process unknown; LOCATED IN: cellular_component unknown; EXPRESSED IN: leaf whorl, sepal, hypocotyl; EXPRESSED DURING: petal differentiation and expansion stage; CONTAINS InterPro DOMAIN/s: SAM dependent carboxyl methyltransferase (Int…
AT1G21070	Chr1:7375868-7378147	5.59013	3.14666	-0.829062	0.0135119	protein_coding	transporter-related		transporter-related; LOCATED IN: membrane; EXPRESSED IN: 23 plant structures; EXPRESSED DURING: 15 growth stages; CONTAINS InterPro DOMAIN/s: Protein of unknown function DUF250 (InterPro:IPR004853); BEST Arabidopsis thaliana protein match is: transporter-related (TAIR:AT1G76670.1); Has 1300 Blast hits to 1295 proteins in 167 species: Archae - 0; Bacteria - 18; Metazoa - 331; Fungi - 208; Plants -…
AT2G28760	Chr2:12336187-12339027	11.0384	6.20042	-0.832088	0.00752467	protein_coding	NAD-dependent epimerase/dehydratase family protein		UDP-XYL SYNTHASE 6 (UXS6); FUNCTIONS IN: coenzyme binding, binding, catalytic activity; INVOLVED IN: cellular metabolic process, nucleotide-sugar metabolic process, metabolic process; LOCATED IN: plasma membrane; EXPRESSED IN: 25 plant structures; EXPRESSED DURING: 13 growth stages; CONTAINS InterPro DOMAIN/s: NAD-dependent epimerase/dehydratase (InterPro:IPR001509), NAD(P)-binding (InterPro:IPR0…
AT1G60060	Chr1:22139183-22141790	6.29253	3.52318	-0.83676	0.0139593	protein_coding	unknown protein		unknown protein; FUNCTIONS IN: molecular_function unknown; INVOLVED IN: biological_process unknown; LOCATED IN: cellular_component unknown; EXPRESSED IN: 18 plant structures; EXPRESSED DURING: 12 growth stages; BEST Arabidopsis thaliana protein match is: unknown protein (TAIR:AT5G53900.2); Has 3600 Blast hits to 2553 proteins in 66 species: Archae - 0; Bacteria - 2; Metazoa - 16; Fungi - 80; Plan…
AT1G71865	Chr1:27029204-27030560	19.3969	10.8549	-0.837483	0.0128949	protein_coding	unknown protein		unknown protein; FUNCTIONS IN: molecular_function unknown; INVOLVED IN: biological_process unknown; LOCATED IN: chloroplast; Has 15 Blast hits to 15 proteins in 7 species: Archae - 0; Bacteria - 0; Metazoa - 0; Fungi - 0; Plants - 15; Viruses - 0; Other Eukaryotes - 0 (source: NCBI BLink).
AT2G42960	Chr2:17868596-17870630	3.96197	2.19925	-0.849203	0.0431454	protein_coding	protein kinase family protein		protein kinase family protein; FUNCTIONS IN: protein serine/threonine kinase activity, protein kinase activity, kinase activity, ATP binding; INVOLVED IN: protein amino acid phosphorylation; LOCATED IN: cellular_component unknown; EXPRESSED IN: 10 plant structures; EXPRESSED DURING: 6 growth stages; CONTAINS InterPro DOMAIN/s: Protein kinase, ATP binding site (InterPro:IPR017441), Protein kinase,…
AT1G19730	Chr1:6822863-6824071	13.8862	7.67964	-0.854537	0.017947	protein_coding	ATTRX4; oxidoreductase, acting on sulfur group of donors, disulfide as acceptor	encodes a cytosolic thioredoxin that reduces disulfide bridges of target proteins by the reversible formation of a disulfide bridge between two neighboring Cys residues present in the active site. Thioredoxins have been found to regulate a variety of biological reactions in prokaryotic and eukaryotic cells.	ATTRX4; FUNCTIONS IN: oxidoreductase activity, acting on sulfur group of donors, disulfide as acceptor; INVOLVED IN: cell redox homeostasis; LOCATED IN: cytosol; EXPRESSED IN: 24 plant structures; EXPRESSED DURING: 14 growth stages; CONTAINS InterPro DOMAIN/s: Thioredoxin-like subdomain (InterPro:IPR006662), Thioredoxin fold (InterPro:IPR012335), Thioredoxin, core (InterPro:IPR015467), Thioredoxi…
AT2G25900	Chr2:11041717-11043171	46.7557	25.8287	-0.856167	1.27e-06	protein_coding	ATCTH; transcription factor	putative Cys3His zinc finger protein (ATCTH) mRNA, complete	ATCTH; FUNCTIONS IN: transcription factor activity; INVOLVED IN: regulation of transcription; EXPRESSED IN: 21 plant structures; EXPRESSED DURING: 13 growth stages; CONTAINS InterPro DOMAIN/s: Zinc finger, CCCH-type (InterPro:IPR000571); BEST Arabidopsis thaliana protein match is: zinc finger (CCCH-type) family protein (TAIR:AT2G19810.1); Has 530 Blast hits to 507 proteins in 97 species: Archae -…
AT3G02930	Chr3:655305-658319	5.79995	3.20189	-0.857115	0.00172077	protein_coding	unknown protein		unknown protein; LOCATED IN: chloroplast; EXPRESSED IN: 19 plant structures; EXPRESSED DURING: 8 growth stages; BEST Arabidopsis thaliana protein match is: unknown protein (TAIR:AT5G16730.1); Has 190257 Blast hits to 89038 proteins in 2489 species: Archae - 2139; Bacteria - 30463; Metazoa - 84815; Fungi - 13664; Plants - 7242; Viruses - 1031; Other Eukaryotes - 50903 (source: NCBI BLink).
AT4G18740	Chr4:10303413-10304572	27.5087	15.1467	-0.860884	0.00202132	protein_coding	transcription termination factor		transcription termination factor; FUNCTIONS IN: transcription termination factor activity; INVOLVED IN: transcription termination; EXPRESSED IN: 21 plant structures; EXPRESSED DURING: 12 growth stages; CONTAINS InterPro DOMAIN/s: Rho termination factor, N-terminal (InterPro:IPR011112); Has 137 Blast hits to 135 proteins in 48 species: Archae - 0; Bacteria - 14; Metazoa - 40; Fungi - 8; Plants - 3…
AT5G51670	Chr5:20993559-20995096	3.807	2.09231	-0.863555	0.0482239	protein_coding	unknown protein		unknown protein; INVOLVED IN: biological_process unknown; LOCATED IN: chloroplast; EXPRESSED IN: inflorescence meristem, hypocotyl, flower, root; EXPRESSED DURING: petal differentiation and expansion stage; CONTAINS InterPro DOMAIN/s: Protein of unknown function DUF668 (InterPro:IPR007700); BEST Arabidopsis thaliana protein match is: unknown protein (TAIR:AT3G23160.1); Has 153 Blast hits to 132 p…
AT5G04890	Chr5:1427172-1428454	5.31581	2.9203	-0.864173	0.0353046	protein_coding	RTM2 (RESTRICTED TEV MOVEMENT 2)	Specifically restricts the long-distance movement of tobacco etch potyvirus (TEV) without involving either hypersensitive cell death or systemic acquired resistance. Multidomain protein containing an N-terminal region with high similarity to plant small heat shock proteins (HSPs).	RESTRICTED TEV MOVEMENT 2 (RTM2); FUNCTIONS IN: molecular_function unknown; INVOLVED IN: response to virus, response to heat; EXPRESSED IN: 16 plant structures; EXPRESSED DURING: 9 growth stages; CONTAINS InterPro DOMAIN/s: Heat shock protein Hsp20 (InterPro:IPR002068), HSP20-like chaperone (InterPro:IPR008978); BEST Arabidopsis thaliana protein match is: heat shock family protein (TAIR:AT5G20970…
AT5G28640	Chr5:10647569-10649892	12.5501	6.88608	-0.865941	0.00201171	protein_coding	AN3 (ANGUSTIFOLIA 3); protein binding / transcription coactivator	Encodes a protein with similarity to mammalian transcriptional coactivator that is involved in cell proliferation during leaf and flower development. Loss of function mutations have narrow, pointed leaves and narrow floral organs. AN3 interacts with members of the growth regulating factor (GRF) family of transcription factors.	ANGUSTIFOLIA 3 (AN3); FUNCTIONS IN: transcription coactivator activity, protein binding; INVOLVED IN: cell proliferation, leaf development; LOCATED IN: cellular_component unknown; EXPRESSED IN: 15 plant structures; EXPRESSED DURING: 7 growth stages; CONTAINS InterPro DOMAIN/s: SSXT (InterPro:IPR007726); BEST Arabidopsis thaliana protein match is: GIF3 (GRF1-INTERACTING FACTOR 3); protein binding …
AT3G48670	Chr3:18030780-18034065	15.0358	8.24737	-0.866392	0.00193148	protein_coding	XH/XS domain-containing protein / XS zinc finger domain-containing protein		XH/XS domain-containing protein / XS zinc finger domain-containing protein; FUNCTIONS IN: molecular_function unknown; INVOLVED IN: response to cadmium ion; LOCATED IN: cellular_component unknown; EXPRESSED IN: root; CONTAINS InterPro DOMAIN/s: Region of unknown function XS (InterPro:IPR005380), Region of unknown function XH (InterPro:IPR005379), Region of unknown function, putative Zinc finger, X…
AT3G05830	Chr3:1736679-1738664	9.92699	5.42043	-0.872948	0.0041171	protein_coding		Encodes alpha-helical IF (intermediate filament)-like protein.	FUNCTIONS IN: molecular_function unknown; INVOLVED IN: biological_process unknown; LOCATED IN: cellular_component unknown; EXPRESSED IN: 21 plant structures; EXPRESSED DURING: 13 growth stages; BEST Arabidopsis thaliana protein match is: unknown protein (TAIR:AT5G26770.2); Has 47453 Blast hits to 23625 proteins in 1317 species: Archae - 488; Bacteria - 3558; Metazoa - 27939; Fungi - 3009; Plants …
AT5G10550	Chr5:3328064-3335232	47.1255	25.6878	-0.875425	0.00150425	protein_coding	GTE2 (Global transcription factor group E 2); DNA binding	This gene is predicted to encode a bromodomain-containing protein. A plant line expressing RNAi constructs targeted against GTE7 shows some resistance to agrobacterium-mediated root transformation.	Global transcription factor group E 2 (GTE2); FUNCTIONS IN: DNA binding; INVOLVED IN: DNA mediated transformation; LOCATED IN: cellular_component unknown; EXPRESSED IN: 23 plant structures; EXPRESSED DURING: 15 growth stages; CONTAINS InterPro DOMAIN/s: Bromodomain (InterPro:IPR001487); BEST Arabidopsis thaliana protein match is: GTE7 (Global transcription factor group E 7); DNA binding (TAIR:AT5…
AT3G10220	Chr3:3161756-3166038	21.7272	11.8046	-0.880158	0.0474613	protein_coding	tubulin folding cofactor B		tubulin folding cofactor B; FUNCTIONS IN: molecular_function unknown; INVOLVED IN: tubulin complex assembly; LOCATED IN: nucleus, phragmoplast, cytoplasm; EXPRESSED IN: 22 plant structures; EXPRESSED DURING: 13 growth stages; CONTAINS InterPro DOMAIN/s: Cytoskeleton-associated protein, CAP-Gly (InterPro:IPR000938); Has 1412 Blast hits to 1124 proteins in 146 species: Archae - 0; Bacteria - 0; Met…
AT2G47260	Chr2:19404819-19407084	4.49662	2.44067	-0.881564	0.011991	protein_coding	WRKY23; transcription factor	member of WRKY Transcription Factor; Group I	WRKY23; FUNCTIONS IN: transcription factor activity; INVOLVED IN: regulation of transcription, DNA-dependent, regulation of transcription; LOCATED IN: nucleus; EXPRESSED IN: 22 plant structures; EXPRESSED DURING: 12 growth stages; CONTAINS InterPro DOMAIN/s: DNA-binding WRKY (InterPro:IPR003657), Transcription factor, WRKY group IIc (InterPro:IPR017396); BEST Arabidopsis thaliana protein match is…
AT5G04420	Chr5:1243757-1249943	21.2667	11.5357	-0.882496	0.00657971	protein_coding	kelch repeat-containing protein		kelch repeat-containing protein; FUNCTIONS IN: molecular_function unknown; INVOLVED IN: biological_process unknown; LOCATED IN: cytosol, nucleus; EXPRESSED IN: 23 plant structures; EXPRESSED DURING: 13 growth stages; CONTAINS InterPro DOMAIN/s: Galactose oxidase/kelch, beta-propeller (InterPro:IPR011043), Kelch repeat type 1 (InterPro:IPR006652), Kelch repeat type 2 (InterPro:IPR011498), Kelch-ty…
AT3G33520	Chr3:14085353-14095549	17.1812	9.29149	-0.88685	0.0342467	protein_coding	ATARP6; structural constituent of cytoskeleton	Encodes ACTIN-RELATED PROTEIN6 (ARP6), a putative component of a chromatin-remodeling complex. Required for both histone acetylation and methylation of the FLC chromatin in Arabidopsis. Along with PIE1 forms a complex to deposit modified histone H2A.Z at several loci within the genome. This modification alters the expression of the target genes (i.e. FLC, MAF4, MAF6. Located at specific regions o…	ATARP6; FUNCTIONS IN: structural constituent of cytoskeleton; INVOLVED IN: in 6 processes; LOCATED IN: nucleus, chromatin remodeling complex; EXPRESSED IN: 26 plant structures; EXPRESSED DURING: 14 growth stages; CONTAINS InterPro DOMAIN/s: Actin/actin-like (InterPro:IPR004000); BEST Arabidopsis thaliana protein match is: actin, putative (TAIR:AT2G42100.1); Has 9321 Blast hits to 9120 proteins in…
AT4G16008	Chr4:9067829-9068512	10.0413	5.39303	-0.896777	0.0375851	protein_coding	unknown protein		unknown protein; FUNCTIONS IN: molecular_function unknown; INVOLVED IN: biological_process unknown; LOCATED IN: cellular_component unknown; Has 1 Blast hits to 1 proteins in 1 species: Archae - 0; Bacteria - 0; Metazoa - 0; Fungi - 0; Plants - 1; Viruses - 0; Other Eukaryotes - 0 (source: NCBI BLink).
AT5G55820	Chr5:22584007-22594035	2.84084	1.52292	-0.899478	0.00124294	protein_coding	unknown protein		unknown protein; FUNCTIONS IN: molecular_function unknown; INVOLVED IN: biological_process unknown; LOCATED IN: cellular_component unknown; EXPRESSED IN: 16 plant structures; EXPRESSED DURING: 8 growth stages; Has 125304 Blast hits to 61210 proteins in 1981 species: Archae - 482; Bacteria - 15262; Metazoa - 56888; Fungi - 9654; Plants - 3645; Viruses - 576; Other Eukaryotes - 38797 (source: NCBI …
AT2G35760	Chr2:15031922-15033307	6.49631	3.47946	-0.900757	0.0356111	protein_coding	integral membrane family protein		integral membrane family protein; FUNCTIONS IN: molecular_function unknown; INVOLVED IN: biological_process unknown; LOCATED IN: cellular_component unknown; EXPRESSED IN: 20 plant structures; EXPRESSED DURING: 13 growth stages; CONTAINS InterPro DOMAIN/s: Uncharacterised protein family UPF0497, trans-membrane plant (InterPro:IPR006702), Uncharacterised protein family UPF0497, trans-membrane plant…
AT5G56020	Chr5:22684404-22686369	10.6002	5.65488	-0.906525	0.00537654	protein_coding			FUNCTIONS IN: molecular_function unknown; INVOLVED IN: biological_process unknown; LOCATED IN: cellular_component unknown; EXPRESSED IN: 22 plant structures; EXPRESSED DURING: 14 growth stages; CONTAINS InterPro DOMAIN/s: SFT2-like (InterPro:IPR011691); BEST Arabidopsis thaliana protein match is: unknown protein (TAIR:AT4G26550.1); Has 436 Blast hits to 436 proteins in 135 species: Archae - 0; Ba…
AT5G06930	Chr5:2144998-2148039	3.20828	1.68965	-0.925075	0.00925214	protein_coding			LOCATED IN: chloroplast; EXPRESSED IN: 15 plant structures; EXPRESSED DURING: 7 growth stages; BEST Arabidopsis thaliana protein match is: nucleolar protein gar2-related (TAIR:AT2G42320.2); Has 3144 Blast hits to 1363 proteins in 247 species: Archae - 2; Bacteria - 721; Metazoa - 835; Fungi - 297; Plants - 80; Viruses - 10; Other Eukaryotes - 1199 (source: NCBI BLink).
AT2G40620	Chr2:16954540-16956978	8.45666	4.45316	-0.925258	0.00188009	protein_coding	bZIP transcription factor family protein		bZIP transcription factor family protein; FUNCTIONS IN: transcription factor activity, DNA binding; INVOLVED IN: regulation of transcription, DNA-dependent; LOCATED IN: nucleus; EXPRESSED IN: 24 plant structures; EXPRESSED DURING: 15 growth stages; CONTAINS InterPro DOMAIN/s: Basic-leucine zipper (bZIP) transcription factor (InterPro:IPR004827), bZIP transcription factor, bZIP-1 (InterPro:IPR0116…
AT5G64780	Chr5:25900558-25902127	6.97398	3.6653	-0.928052	0.0382072	protein_coding			FUNCTIONS IN: molecular_function unknown; INVOLVED IN: biological_process unknown; LOCATED IN: cellular_component unknown; EXPRESSED IN: 21 plant structures; EXPRESSED DURING: 15 growth stages; CONTAINS InterPro DOMAIN/s: Uncharacterised conserved protein UCP009193 (InterPro:IPR016549); BEST Arabidopsis thaliana protein match is: unknown protein (TAIR:AT4G09830.1); Has 56 Blast hits to 56 protein…
AT3G12830	Chr3:4078650-4079608	10.0236	5.25614	-0.931325	0.0080376	protein_coding	auxin-responsive family protein		auxin-responsive family protein; FUNCTIONS IN: molecular_function unknown; INVOLVED IN: response to auxin stimulus; EXPRESSED IN: 20 plant structures; EXPRESSED DURING: 13 growth stages; CONTAINS InterPro DOMAIN/s: Auxin responsive SAUR protein (InterPro:IPR003676); BEST Arabidopsis thaliana protein match is: auxin-responsive family protein (TAIR:AT1G56150.1); Has 606 Blast hits to 604 proteins i…
AT3G23880	Chr3:8621985-8623162	4.07072	2.12472	-0.938011	0.0461563	protein_coding	F-box family protein		F-box family protein; FUNCTIONS IN: molecular_function unknown; INVOLVED IN: biological_process unknown; LOCATED IN: nucleus; EXPRESSED IN: 16 plant structures; EXPRESSED DURING: 10 growth stages; CONTAINS InterPro DOMAIN/s: Cyclin-like F-box (InterPro:IPR001810), F-box associated (InterPro:IPR006527), F-box associated type 1 (InterPro:IPR017451); BEST Arabidopsis thaliana protein match is: F-box…
AT5G14090	Chr5:4547201-4549417	6.90097	3.58305	-0.945612	0.00705155	protein_coding	unknown protein		unknown protein; FUNCTIONS IN: molecular_function unknown; INVOLVED IN: biological_process unknown; LOCATED IN: cellular_component unknown; EXPRESSED IN: 12 plant structures; EXPRESSED DURING: 7 growth stages; Has 23 Blast hits to 23 proteins in 9 species: Archae - 0; Bacteria - 0; Metazoa - 0; Fungi - 0; Plants - 18; Viruses - 0; Other Eukaryotes - 5 (source: NCBI BLink).
AT1G73370	Chr1:27584478-27588326	2.80975	1.45378	-0.950637	0.00707446	protein_coding	SUS6 (SUCROSE SYNTHASE 6); UDP-glycosyltransferase/ sucrose synthase	Encodes a protein with sucrose synthase activity (SUS6).	SUCROSE SYNTHASE 6 (SUS6); FUNCTIONS IN: UDP-glycosyltransferase activity, sucrose synthase activity; INVOLVED IN: sucrose biosynthetic process, biosynthetic process, sucrose metabolic process; LOCATED IN: cellular_component unknown; EXPRESSED IN: 29 plant structures; EXPRESSED DURING: 13 growth stages; CONTAINS InterPro DOMAIN/s: Sucrose synthase, plants and cyanobacteria (InterPro:IPR012820), S…
AT1G11600	Chr1:3902011-3903782	9.4185	4.80759	-0.970185	0.000183342	protein_coding	CYP77B1; electron carrier/ heme binding / iron ion binding / monooxygenase/ oxygen binding	member of CYP77B	CYP77B1; FUNCTIONS IN: electron carrier activity, monooxygenase activity, iron ion binding, oxygen binding, heme binding; LOCATED IN: endomembrane system; EXPRESSED IN: 17 plant structures; EXPRESSED DURING: 8 growth stages; CONTAINS InterPro DOMAIN/s: Cytochrome P450 (InterPro:IPR001128), Cytochrome P450, C-terminal region (InterPro:IPR017973), Cytochrome P450, E-class, group I (InterPro:IPR0024…
AT4G19515	Chr4:10640157-10642195	9.14906	4.66882	-0.970566	0.000115598	protein_coding	disease resistance family protein		disease resistance family protein; FUNCTIONS IN: transmembrane receptor activity; INVOLVED IN: signal transduction, innate immune response; LOCATED IN: intrinsic to membrane, endomembrane system, membrane; CONTAINS InterPro DOMAIN/s: Toll-Interleukin receptor (InterPro:IPR000157); BEST Arabidopsis thaliana protein match is: TTR1; protein binding / transcription factor (TAIR:AT5G45050.2); Has 981 …
AT1G67320	Chr1:25205391-25208972	13.4594	6.8609	-0.97215	6.36e-05	protein_coding	DNA primase, large subunit family		DNA primase, large subunit family; FUNCTIONS IN: DNA primase activity; INVOLVED IN: DNA replication, synthesis of RNA primer; LOCATED IN: alpha DNA polymerase:primase complex; EXPRESSED IN: 21 plant structures; EXPRESSED DURING: 13 growth stages; CONTAINS InterPro DOMAIN/s: DNA primase, large subunit, eukaryotic (InterPro:IPR016558), DNA primase, large subunit, eukaryotic/archaeal (InterPro:IPR00…
AT4G16840	Chr4:9474884-9475523	17.1956	8.74492	-0.975526	0.0329397	protein_coding	unknown protein		unknown protein; FUNCTIONS IN: molecular_function unknown; INVOLVED IN: biological_process unknown; EXPRESSED IN: 21 plant structures; EXPRESSED DURING: 13 growth stages; BEST Arabidopsis thaliana protein match is: unknown protein (TAIR:AT2G35658.3); Has 23 Blast hits to 23 proteins in 6 species: Archae - 0; Bacteria - 0; Metazoa - 0; Fungi - 0; Plants - 23; Viruses - 0; Other Eukaryotes - 0 (sou…
AT1G47840	Chr1:17616106-17618894	2.3922	1.20807	-0.985632	0.0486204	protein_coding	HXK3 (HEXOKINASE 3); ATP binding / fructokinase/ glucokinase/ hexokinase	Encodes a putative hexokinase.	HEXOKINASE 3 (HXK3); FUNCTIONS IN: hexokinase activity, fructokinase activity, glucokinase activity, ATP binding; INVOLVED IN: response to salt stress, response to cold, response to hypoxia, cell division, response to osmotic stress; LOCATED IN: chloroplast; EXPRESSED IN: 6 plant structures; EXPRESSED DURING: E expanded cotyledon stage; CONTAINS InterPro DOMAIN/s: Hexokinase (InterPro:IPR001312);…
AT1G67400	Chr1:25247987-25250734	7.81279	3.94272	-0.986645	0.00963819	protein_coding			INVOLVED IN: phagocytosis; LOCATED IN: cytoskeleton; CONTAINS InterPro DOMAIN/s: Engulfment and cell motility, ELMO (InterPro:IPR006816); BEST Arabidopsis thaliana protein match is: phagocytosis and cell motility protein ELMO1-related (TAIR:AT3G43400.1); Has 660 Blast hits to 660 proteins in 104 species: Archae - 0; Bacteria - 0; Metazoa - 430; Fungi - 39; Plants - 109; Viruses - 0; Other Eukaryo…
AT3G05660	Chr3:1648842-1652001	6.30825	3.16942	-0.993019	3.57e-05	protein_coding	AtRLP33 (Receptor Like Protein 33); kinase/ protein binding		Receptor Like Protein 33 (AtRLP33); FUNCTIONS IN: protein binding, kinase activity; INVOLVED IN: signal transduction, defense response; LOCATED IN: chloroplast; EXPRESSED IN: 10 plant structures; EXPRESSED DURING: 10 growth stages; CONTAINS InterPro DOMAIN/s: Leucine-rich repeat, typical subtype (InterPro:IPR003591), Leucine-rich repeat (InterPro:IPR001611), Leucine-rich repeat, N-terminal (Inter…
AT1G20060	Chr1:6950654-6956293	1.72115	0.862627	-0.99656	0.0223936	protein_coding	ATP binding / microtubule motor		ATP binding / microtubule motor; FUNCTIONS IN: microtubule motor activity, ATP binding; INVOLVED IN: microtubule-based movement; LOCATED IN: microtubule associated complex, chloroplast; CONTAINS InterPro DOMAIN/s: Kinesin, motor region (InterPro:IPR001752); BEST Arabidopsis thaliana protein match is: kinesin-related protein (MKRP2) (TAIR:AT4G39050.1); Has 7948 Blast hits to 7493 proteins in 293 s…
AT4G38650	Chr4:18063165-18065849	1.90107	0.950238	-1.00045	0.0480408	protein_coding	glycosyl hydrolase family 10 protein		glycosyl hydrolase family 10 protein; FUNCTIONS IN: cation binding, hydrolase activity, hydrolyzing O-glycosyl compounds, catalytic activity; INVOLVED IN: carbohydrate metabolic process; LOCATED IN: endomembrane system; CONTAINS InterPro DOMAIN/s: Glycoside hydrolase, family 10 (InterPro:IPR001000), Glycoside hydrolase, catalytic core (InterPro:IPR017853), Glycoside hydrolase, subgroup, catalytic…
AT2G19460	Chr2:8431481-8432105	15.1201	7.54728	-1.00244	0.00901876	protein_coding	unknown protein		unknown protein; FUNCTIONS IN: molecular_function unknown; INVOLVED IN: biological_process unknown; LOCATED IN: cellular_component unknown; EXPRESSED IN: 22 plant structures; EXPRESSED DURING: 13 growth stages; BEST Arabidopsis thaliana protein match is: unknown protein (TAIR:AT5G11970.1); Has 121 Blast hits to 121 proteins in 9 species: Archae - 0; Bacteria - 0; Metazoa - 0; Fungi - 0; Plants - …
AT5G07080	Chr5:2200331-2202110	3.32914	1.65727	-1.00634	0.0269664	protein_coding	transferase family protein		transferase family protein; FUNCTIONS IN: transferase activity, transferring acyl groups other than amino-acyl groups, transferase activity; INVOLVED IN: biological_process unknown; LOCATED IN: cellular_component unknown; EXPRESSED IN: 18 plant structures; EXPRESSED DURING: 9 growth stages; CONTAINS InterPro DOMAIN/s: Transferase (InterPro:IPR003480); BEST Arabidopsis thaliana protein match is: t…
AT3G13960	Chr3:4608382-4610399	4.70755	2.34311	-1.00655	0.00827541	protein_coding	AtGRF5 (GROWTH-REGULATING FACTOR 5); transcription activator	Growth regulating factor encoding transcription activator. One of the nine members of a GRF gene family, containing nuclear targeting domain. Involved in leaf development and expressed in root, shoot and flower.	GROWTH-REGULATING FACTOR 5 (AtGRF5); FUNCTIONS IN: transcription activator activity; INVOLVED IN: leaf development; LOCATED IN: nucleus; EXPRESSED IN: 11 plant structures; EXPRESSED DURING: 6 growth stages; CONTAINS InterPro DOMAIN/s: Glutamine-Leucine-Glutamine, QLQ (InterPro:IPR014978), WRC (InterPro:IPR014977); BEST Arabidopsis thaliana protein match is: AtGRF6 (GROWTH-REGULATING FACTOR 6); tr…
AT4G03270	Chr4:1432374-1433691	7.0074	3.4877	-1.0066	0.0192456	protein_coding	CYCD6;1 (Cyclin D6;1); cyclin-dependent protein kinase		Cyclin D6;1 (CYCD6;1); FUNCTIONS IN: cyclin-dependent protein kinase activity; INVOLVED IN: regulation of cell cycle; LOCATED IN: nucleus; EXPRESSED IN: 11 plant structures; EXPRESSED DURING: F mature embryo stage, 4 leaf senescence stage, petal differentiation and expansion stage, D bilateral stage, E expanded cotyledon stage; CONTAINS InterPro DOMAIN/s: Cyclin, C-terminal (InterPro:IPR004367), …
AT2G38695	Chr2:16177940-16180403	7.85776	3.88815	-1.01503	0.0430963	protein_coding	unknown protein		unknown protein; LOCATED IN: membrane; Has 31 Blast hits to 31 proteins in 9 species: Archae - 0; Bacteria - 0; Metazoa - 0; Fungi - 0; Plants - 31; Viruses - 0; Other Eukaryotes - 0 (source: NCBI BLink).
AT5G34940	Chr5:13235828-13238839	5.16711	2.55421	-1.01648	0.0105565	protein_coding	AtGUS3 (Arabidopsis thaliana glucuronidase 3); beta-glucuronidase	The protein is predicted (WoLF PSORT program) to be membrane-associated.	Arabidopsis thaliana glucuronidase 3 (AtGUS3); FUNCTIONS IN: beta-glucuronidase activity; INVOLVED IN: biological_process unknown; LOCATED IN: plant-type cell wall; EXPRESSED IN: 22 plant structures; EXPRESSED DURING: 11 growth stages; CONTAINS InterPro DOMAIN/s: Glycoside hydrolase family 79, N-terminal (InterPro:IPR005199); BEST Arabidopsis thaliana protein match is: AtGUS1 (Arabidopsis thalian…
AT2G26810	Chr2:11433732-11436277	9.54557	4.70347	-1.02111	0.0498162	protein_coding	unknown protein		unknown protein; FUNCTIONS IN: molecular_function unknown; INVOLVED IN: biological_process unknown; LOCATED IN: cellular_component unknown; EXPRESSED IN: 21 plant structures; EXPRESSED DURING: 13 growth stages; BEST Arabidopsis thaliana protein match is: unknown protein (TAIR:AT2G26200.1); Has 1086 Blast hits to 1084 proteins in 196 species: Archae - 9; Bacteria - 84; Metazoa - 522; Fungi - 217; …
AT4G23320	Chr4:12189181-12191626	3.06699	1.50023	-1.03164	0.04709	protein_coding	protein kinase family protein		protein kinase family protein; FUNCTIONS IN: kinase activity; INVOLVED IN: protein amino acid phosphorylation; EXPRESSED IN: stem, cauline leaf, leaf; EXPRESSED DURING: LP.06 six leaves visible; CONTAINS InterPro DOMAIN/s: Protein kinase, ATP binding site (InterPro:IPR017441), Serine/threonine protein kinase (InterPro:IPR002290), Protein of unknown function DUF26 (InterPro:IPR002902), Tyrosine pr…
AT2G42870	Chr2:17836415-17837250	8.81123	4.3075	-1.03249	0.0116381	protein_coding	PAR1 (PHY RAPIDLY REGULATED 1)	Encodes PHYTOCHROME RAPIDLY REGULATED1 (PAR1), an atypical basic helix-loop-helix (bHLP) protein. Closely related to PAR2 (At3g58850). Up regulated after simulated shade perception. Acts in the nucleus to control plant development and as a negative regulator of shade avoidance response. Functions as transcriptional repressor of auxin-responsive genes SAUR15 (AT4G38850) and SAUR68 (AT1G29510).	PHY RAPIDLY REGULATED 1 (PAR1); INVOLVED IN: developmental process, shade avoidance; LOCATED IN: nucleus; EXPRESSED IN: 11 plant structures; EXPRESSED DURING: 8 growth stages; BEST Arabidopsis thaliana protein match is: PAR2 (PHY RAPIDLY REGULATED 2) (TAIR:AT3G58850.1); Has 47 Blast hits to 47 proteins in 6 species: Archae - 0; Bacteria - 0; Metazoa - 0; Fungi - 0; Plants - 47; Viruses - 0; Other…
AT5G19340	Chr5:6515091-6516205	4.58967	2.21591	-1.05049	0.0237074	protein_coding	unknown protein		unknown protein; FUNCTIONS IN: molecular_function unknown; INVOLVED IN: biological_process unknown; LOCATED IN: cellular_component unknown; EXPRESSED IN: 16 plant structures; EXPRESSED DURING: 6 growth stages; BEST Arabidopsis thaliana protein match is: unknown protein (TAIR:AT3G05980.1); Has 959 Blast hits to 862 proteins in 48 species: Archae - 0; Bacteria - 4; Metazoa - 58; Fungi - 32; Plants …
AT2G20635	Chr2:8900409-8903384	3.90187	1.87244	-1.05924	0.0112006	protein_coding	ATP binding / protein kinase/ protein serine/threonine kinase		ATP binding / protein kinase/ protein serine/threonine kinase; FUNCTIONS IN: protein serine/threonine kinase activity, protein kinase activity, ATP binding; INVOLVED IN: protein amino acid phosphorylation; LOCATED IN: cellular_component unknown; CONTAINS InterPro DOMAIN/s: Mitotic checkpoint serine/threonine protein kinase, Bub1 (InterPro:IPR015661), Protein kinase, core (InterPro:IPR000719), Ser…
AT1G77120	Chr1:28975393-28978743	10.5301	5.03216	-1.06527	0.00601069	protein_coding	ADH1 (ALCOHOL DEHYDROGENASE 1); alcohol dehydrogenase	Catalyzes the reduction of acetaldehyde using NADH as reductant. Requires zinc for activity. Dimer. Anaerobic response polypeptide (ANP). Fermentation. The protein undergoes thiolation following treatment with the oxidant tert-butylhydroperoxide.	ALCOHOL DEHYDROGENASE 1 (ADH1); FUNCTIONS IN: alcohol dehydrogenase activity; INVOLVED IN: response to cadmium ion, cellular respiration, response to salt stress, response to hypoxia, response to osmotic stress; LOCATED IN: cytosol, plasma membrane; EXPRESSED IN: 24 plant structures; EXPRESSED DURING: 12 growth stages; CONTAINS InterPro DOMAIN/s: GroES-like (InterPro:IPR011032), NAD(P)-binding (I…
AT2G43120	Chr2:17927263-17928984	11.2276	5.36126	-1.0664	0.000461839	protein_coding	pirin, putative		pirin, putative; FUNCTIONS IN: calmodulin binding; INVOLVED IN: biological_process unknown; LOCATED IN: plasma membrane; EXPRESSED IN: stem, flower; CONTAINS InterPro DOMAIN/s: Pirin, C-terminal (InterPro:IPR008778), Pirin (InterPro:IPR012093), Cupin, RmlC-type (InterPro:IPR011051), Pirin, N-terminal (InterPro:IPR003829); BEST Arabidopsis thaliana protein match is: PRN (PIRIN); calmodulin binding…
AT1G22250	Chr1:7858863-7865249	13.5395	6.45076	-1.06963	0.0018916	protein_coding	unknown protein		unknown protein; FUNCTIONS IN: molecular_function unknown; INVOLVED IN: biological_process unknown; LOCATED IN: cellular_component unknown; BEST Arabidopsis thaliana protein match is: unknown protein (TAIR:AT1G78170.1); Has 33 Blast hits to 33 proteins in 5 species: Archae - 0; Bacteria - 0; Metazoa - 0; Fungi - 0; Plants - 33; Viruses - 0; Other Eukaryotes - 0 (source: NCBI BLink).
AT2G03530	Chr2:1071593-1073566	18.6867	8.82673	-1.08206	1.38e-06	protein_coding	UPS2 (UREIDE PERMEASE 2)	Mediate high-affinity uracil and 5-FU (a toxic uracil analogue) transport when expressed in yeast and Xenopus oocytes.Involved in allantoin transport.	UREIDE PERMEASE 2 (UPS2); LOCATED IN: plasma membrane; EXPRESSED IN: 24 plant structures; EXPRESSED DURING: 10 growth stages; CONTAINS InterPro DOMAIN/s: Fatty acid elongase 3-ketoacyl-CoA synthase 1 (InterPro:IPR009834); BEST Arabidopsis thaliana protein match is: ATUPS1 (ARABIDOPSIS THALIANA UREIDE PERMEASE 1); allantoin uptake transmembrane transporter (TAIR:AT2G03590.1); Has 144 Blast hits to…
AT5G54850	Chr5:22280582-22281428	5.21393	2.45702	-1.08546	0.0333853	protein_coding	unknown protein		unknown protein; FUNCTIONS IN: molecular_function unknown; INVOLVED IN: biological_process unknown; LOCATED IN: cellular_component unknown; EXPRESSED IN: 8 plant structures; EXPRESSED DURING: 6 growth stages; Has 26 Blast hits to 22 proteins in 11 species: Archae - 0; Bacteria - 0; Metazoa - 3; Fungi - 14; Plants - 9; Viruses - 0; Other Eukaryotes - 0 (source: NCBI BLink).
AT1G36940	Chr1:14003902-14004911	3.9756	1.87258	-1.08615	0.0369755	protein_coding	unknown protein		unknown protein; FUNCTIONS IN: molecular_function unknown; INVOLVED IN: biological_process unknown; LOCATED IN: cellular_component unknown; EXPRESSED IN: 8 plant structures; EXPRESSED DURING: 7 growth stages; Has 9 Blast hits to 9 proteins in 2 species: Archae - 0; Bacteria - 0; Metazoa - 0; Fungi - 0; Plants - 9; Viruses - 0; Other Eukaryotes - 0 (source: NCBI BLink).
AT1G58280	Chr1:21620330-21622611	5.77072	2.71717	-1.08665	0.0351044	protein_coding			LOCATED IN: chloroplast; CONTAINS InterPro DOMAIN/s: Phosphoglycerate mutase (InterPro:IPR013078); BEST Arabidopsis thaliana protein match is: unknown protein (TAIR:AT5G64460.6); Has 337 Blast hits to 337 proteins in 68 species: Archae - 0; Bacteria - 4; Metazoa - 0; Fungi - 175; Plants - 69; Viruses - 0; Other Eukaryotes - 89 (source: NCBI BLink).
AT4G33810	Chr4:16213323-16215594	2.35327	1.10401	-1.09191	0.0337764	protein_coding	glycosyl hydrolase family 10 protein		glycosyl hydrolase family 10 protein; FUNCTIONS IN: cation binding, hydrolase activity, hydrolyzing O-glycosyl compounds, catalytic activity; INVOLVED IN: carbohydrate metabolic process; LOCATED IN: cell wall; EXPRESSED IN: 21 plant structures; EXPRESSED DURING: 12 growth stages; CONTAINS InterPro DOMAIN/s: Glycoside hydrolase, family 10 (InterPro:IPR001000), Glycoside hydrolase, catalytic core (…
AT2G34355	Chr2:14496327-14498389	3.89653	1.82073	-1.09767	0.00650888	protein_coding	nodulin-related		nodulin-related; LOCATED IN: endomembrane system; CONTAINS InterPro DOMAIN/s: Nodulin-like (InterPro:IPR010658), Major facilitator superfamily, general substrate transporter (InterPro:IPR016196); BEST Arabidopsis thaliana protein match is: nodulin-related (TAIR:AT2G34350.1); Has 1509 Blast hits to 1479 proteins in 401 species: Archae - 11; Bacteria - 639; Metazoa - 10; Fungi - 188; Plants - 318; …
AT1G25250	Chr1:8849548-8851612	4.65542	2.14886	-1.11534	0.0133488	protein_coding	AtIDD16 (Arabidopsis thaliana Indeterminate(ID)-Domain 16); nucleic acid binding / transcription factor/ zinc ion binding		Arabidopsis thaliana Indeterminate(ID)-Domain 16 (AtIDD16); FUNCTIONS IN: transcription factor activity, zinc ion binding, nucleic acid binding; INVOLVED IN: regulation of transcription; LOCATED IN: intracellular; EXPRESSED IN: 22 plant structures; EXPRESSED DURING: 14 growth stages; CONTAINS InterPro DOMAIN/s: Zinc finger, C2H2-like (InterPro:IPR015880), Zinc finger, C2H2-type (InterPro:IPR00708…
AT5G25240	Chr5:8746604-8747197	10.861	4.91668	-1.1434	0.0141657	protein_coding			FUNCTIONS IN: molecular_function unknown; INVOLVED IN: biological_process unknown; LOCATED IN: cellular_component unknown; EXPRESSED IN: 23 plant structures; EXPRESSED DURING: 13 growth stages; BEST Arabidopsis thaliana protein match is: NHL repeat-containing protein (TAIR:AT5G14890.1); Has 23 Blast hits to 23 proteins in 7 species: Archae - 0; Bacteria - 0; Metazoa - 0; Fungi - 0; Plants - 23; V…
AT1G68470	Chr1:25676394-25678288	3.52393	1.56593	-1.17017	0.00880488	protein_coding	exostosin family protein		exostosin family protein; FUNCTIONS IN: catalytic activity; INVOLVED IN: biological_process unknown; LOCATED IN: membrane; EXPRESSED IN: 18 plant structures; EXPRESSED DURING: 13 growth stages; CONTAINS InterPro DOMAIN/s: Exostosin-like (InterPro:IPR004263); BEST Arabidopsis thaliana protein match is: MUR3 (MURUS 3); catalytic/ transferase, transferring glycosyl groups (TAIR:AT2G20370.1); Has 431…
AT2G34920	Chr2:14726799-14731156	2.16253	0.960303	-1.17116	0.00592779	protein_coding	EDA18 (embryo sac development arrest 18); protein binding / zinc ion binding		embryo sac development arrest 18 (EDA18); FUNCTIONS IN: protein binding, zinc ion binding; INVOLVED IN: embryo sac development, pollen development; LOCATED IN: cellular_component unknown; EXPRESSED IN: 17 plant structures; EXPRESSED DURING: 8 growth stages; CONTAINS InterPro DOMAIN/s: Zinc finger, RING-type (InterPro:IPR001841); BEST Arabidopsis thaliana protein match is: protein binding / zinc i…
AT3G28370	Chr3:10620626-10623259	11.5698	5.13537	-1.17183	0.000991287	protein_coding	unknown protein		unknown protein; FUNCTIONS IN: molecular_function unknown; INVOLVED IN: biological_process unknown; LOCATED IN: cellular_component unknown; BEST Arabidopsis thaliana protein match is: unknown protein (TAIR:AT1G51430.1); Has 4868 Blast hits to 3782 proteins in 461 species: Archae - 132; Bacteria - 466; Metazoa - 2329; Fungi - 449; Plants - 205; Viruses - 14; Other Eukaryotes - 1273 (source: NCBI B…
AT5G62430	Chr5:25069092-25070934	13.4793	5.90197	-1.19148	1.19e-05	protein_coding	CDF1 (CYCLING DOF FACTOR 1); DNA binding / protein binding / transcription factor	Dof-type zinc finger domain-containing protein, similar to H-protein promoter binding factor-2a GI:3386546 from (Arabidopsis thaliana). Represses expression of Constans (CO), a circadian regulator of flowering time. Interacts with LKP2 and FKF1. Expression oscillates under constant light conditions. Mainly expressed in the vasculature of cotyledons, leaves and hypocotyls, but also in stomata. Loc…	CYCLING DOF FACTOR 1 (CDF1); FUNCTIONS IN: protein binding, transcription factor activity, DNA binding; INVOLVED IN: negative regulation of transcription, regulation of timing of transition from vegetative to reproductive phase, regulation of transcription; LOCATED IN: nucleus; EXPRESSED IN: 23 plant structures; EXPRESSED DURING: 9 growth stages; CONTAINS InterPro DOMAIN/s: Zinc finger, Dof-type …
AT3G61160	Chr3:22635880-22641237	4.9208	2.13685	-1.2034	0.0143767	protein_coding	shaggy-related protein kinase beta / ASK-beta (ASK2)		shaggy-related protein kinase beta / ASK-beta (ASK2); FUNCTIONS IN: protein serine/threonine kinase activity, protein tyrosine kinase activity, protein kinase activity, ATP binding; INVOLVED IN: protein amino acid phosphorylation; LOCATED IN: cytosol; EXPRESSED IN: 25 plant structures; EXPRESSED DURING: 14 growth stages; CONTAINS InterPro DOMAIN/s: Protein kinase, ATP binding site (InterPro:IPR01…
AT5G58310	Chr5:23571878-23576084	13.3237	5.78303	-1.2041	0.00397685	protein_coding	MES18 (METHYL ESTERASE 18); hydrolase/ hydrolase, acting on ester bonds / methyl indole-3-acetate esterase	Encodes a protein shown to have methyl IAA esterase activity in vitro. This protein does not act on methyl JA, MeSA, MeGA4, or MEGA9 in vitro.	METHYL ESTERASE 18 (MES18); FUNCTIONS IN: hydrolase activity, hydrolase activity, acting on ester bonds, methyl indole-3-acetate esterase activity; LOCATED IN: cellular_component unknown; EXPRESSED IN: 15 plant structures; EXPRESSED DURING: 10 growth stages; CONTAINS InterPro DOMAIN/s: Alpha/beta hydrolase fold-1 (InterPro:IPR000073); BEST Arabidopsis thaliana protein match is: MES16 (METHYL ESTE…
AT2G17280	Chr2:7513127-7515048	3.77773	1.6356	-1.2077	0.0243986	protein_coding	phosphoglycerate/bisphosphoglycerate mutase family protein		phosphoglycerate/bisphosphoglycerate mutase family protein; FUNCTIONS IN: catalytic activity; INVOLVED IN: metabolic process; LOCATED IN: cellular_component unknown; EXPRESSED IN: 24 plant structures; EXPRESSED DURING: 13 growth stages; CONTAINS InterPro DOMAIN/s: Phosphoglycerate mutase (InterPro:IPR013078); BEST Arabidopsis thaliana protein match is: unknown protein (TAIR:AT5G64460.6); Has 378 …
AT5G49170	Chr5:19938575-19939571	7.6213	3.29961	-1.20774	0.00430362	protein_coding	unknown protein		unknown protein; FUNCTIONS IN: molecular_function unknown; INVOLVED IN: biological_process unknown; LOCATED IN: cellular_component unknown; EXPRESSED IN: 14 plant structures; EXPRESSED DURING: 7 growth stages; BEST Arabidopsis thaliana protein match is: unknown protein (TAIR:AT3G06840.1); Has 11 Blast hits to 11 proteins in 4 species: Archae - 0; Bacteria - 0; Metazoa - 0; Fungi - 0; Plants - 11;…
AT4G14840	Chr4:8510907-8513727	2.68991	1.16224	-1.21065	0.0214184	protein_coding	unknown protein		unknown protein; LOCATED IN: cellular_component unknown; EXPRESSED IN: 10 plant structures; EXPRESSED DURING: 6 growth stages; BEST Arabidopsis thaliana protein match is: unknown protein (TAIR:AT3G22520.1); Has 1350 Blast hits to 1200 proteins in 204 species: Archae - 9; Bacteria - 99; Metazoa - 566; Fungi - 111; Plants - 49; Viruses - 5; Other Eukaryotes - 511 (source: NCBI BLink).
AT5G46500	Chr5:18856453-18857787	2.41797	1.03518	-1.22391	0.0361843	protein_coding			FUNCTIONS IN: molecular_function unknown; INVOLVED IN: biological_process unknown; EXPRESSED IN: 7 plant structures; EXPRESSED DURING: LP.06 six leaves visible, 4 anthesis, LP.04 four leaves visible, LP.10 ten leaves visible, LP.08 eight leaves visible; BEST Arabidopsis thaliana protein match is: disease resistance protein (TIR-NBS-LRR class), putative (TAIR:AT5G46260.1); Has 61 Blast hits to 44 …
AT5G39090	Chr5:15643602-15645116	2.0083	0.859074	-1.22512	0.0328714	protein_coding	transferase family protein		transferase family protein; FUNCTIONS IN: transferase activity, transferring acyl groups other than amino-acyl groups, transferase activity; INVOLVED IN: biological_process unknown; EXPRESSED IN: 12 plant structures; EXPRESSED DURING: 6 growth stages; CONTAINS InterPro DOMAIN/s: Transferase (InterPro:IPR003480); BEST Arabidopsis thaliana protein match is: transferase/ transferase, transferring ac…
AT3G60180	Chr3:22242503-22244061	11.7806	5.03384	-1.22669	0.00277957	protein_coding	uridylate kinase, putative / uridine monophosphate kinase, putative / UMP kinase, putative		uridylate kinase, putative / uridine monophosphate kinase, putative / UMP kinase, putative; FUNCTIONS IN: nucleobase, nucleoside, nucleotide kinase activity, uridylate kinase activity, nucleotide kinase activity, ATP binding, phosphotransferase activity, phosphate group as acceptor; INVOLVED IN: pyrimidine ribonucleotide metabolic process, nucleobase, nucleoside, nucleotide and nucleic acid metab…
AT3G57970	Chr3:21465225-21466677	6.09865	2.58038	-1.24091	0.00619711	protein_coding	emsy N terminus domain-containing protein / ENT domain-containing protein		emsy N terminus domain-containing protein / ENT domain-containing protein; FUNCTIONS IN: molecular_function unknown; INVOLVED IN: biological_process unknown; LOCATED IN: cellular_component unknown; EXPRESSED IN: shoot apex, stem, petal, flower, stamen; EXPRESSED DURING: 4 anthesis, petal differentiation and expansion stage; CONTAINS InterPro DOMAIN/s: ENT (InterPro:IPR005491), Tudor-like, plant (…
AT5G47650	Chr5:19309226-19312438	14.4361	6.09296	-1.24447	0.0173622	protein_coding	ATNUDT2 (ARABIDOPSIS THALIANA NUDIX HYDROLASE HOMOLOG 2); ADP-ribose diphosphatase/ NAD or NADH binding / hydrolase	Encodes an ADP-ribose pyrophosphatase that confers enhanced tolerance to oxidative stress.	ARABIDOPSIS THALIANA NUDIX HYDROLASE HOMOLOG 2 (ATNUDT2); FUNCTIONS IN: ADP-ribose diphosphatase activity, hydrolase activity, NAD or NADH binding; INVOLVED IN: response to oxidative stress; LOCATED IN: cytosol; EXPRESSED IN: 17 plant structures; EXPRESSED DURING: 12 growth stages; CONTAINS InterPro DOMAIN/s: NUDIX (InterPro:IPR015797), Anti-sense to fibroblast growth factor protein GFG (InterPro…
AT1G76890	Chr1:28873058-28875292	13.6056	5.71571	-1.25119	0.00244572	protein_coding	GT2; transcription factor	encodes a plant trihelix DNA-binding protein	GT2; FUNCTIONS IN: transcription factor activity; EXPRESSED IN: 19 plant structures; EXPRESSED DURING: 10 growth stages; CONTAINS InterPro DOMAIN/s: SANT, DNA-binding (InterPro:IPR001005), MYB-like (InterPro:IPR017877); BEST Arabidopsis thaliana protein match is: trihelix DNA-binding protein, putative (TAIR:AT1G76880.1); Has 2546 Blast hits to 1460 proteins in 146 species: Archae - 0; Bacteria - …
AT4G01950	Chr4:844408-846787	20.4584	8.56985	-1.25535	3.64e-10	protein_coding	GPAT3 (GLYCEROL-3-PHOSPHATE ACYLTRANSFERASE 3); acyltransferase	Encodes a member of a family of proteins with glycerol-3-phosphate acyltransferase activity.	GLYCEROL-3-PHOSPHATE ACYLTRANSFERASE 3 (GPAT3); FUNCTIONS IN: acyltransferase activity; INVOLVED IN: metabolic process; EXPRESSED IN: 14 plant structures; EXPRESSED DURING: 9 growth stages; CONTAINS InterPro DOMAIN/s: Phospholipid/glycerol acyltransferase (InterPro:IPR002123); BEST Arabidopsis thaliana protein match is: GPAT2 (GLYCEROL-3-PHOSPHATE ACYLTRANSFERASE 2); acyltransferase (TAIR:AT1G023…
AT5G25880	Chr5:9024548-9028377	1.71418	0.698322	-1.29556	0.0196024	protein_coding	ATNADP-ME3 (NADP-malic enzyme 3); malate dehydrogenase (oxaloacetate-decarboxylating) (NADP+)/ malic enzyme/ oxidoreductase, acting on NADH or NADPH, NAD or NADP as acceptor	The malic enzyme (EC 1.1.1.40) encoded by the ATNADP-ME3 is presumably cytosolic and restricted in its expression by both developmental and cell-specific signals.	NADP-malic enzyme 3 (ATNADP-ME3); FUNCTIONS IN: oxidoreductase activity, acting on NADH or NADPH, NAD or NADP as acceptor, malate dehydrogenase (oxaloacetate-decarboxylating) (NADP+) activity, malic enzyme activity; INVOLVED IN: oxidation reduction, N-terminal protein myristoylation, malate metabolic process, metabolic process; LOCATED IN: cellular_component unknown; EXPRESSED IN: 10 plant struct…
AT3G27650	Chr3:10238545-10240611	3.67938	1.49744	-1.29696	0.0237206	protein_coding	LBD25 (LOB DOMAIN-CONTAINING PROTEIN 25)		LOB DOMAIN-CONTAINING PROTEIN 25 (LBD25); INVOLVED IN: biological_process unknown; LOCATED IN: cellular_component unknown; EXPRESSED IN: flower; EXPRESSED DURING: petal differentiation and expansion stage; CONTAINS InterPro DOMAIN/s: Lateral organ boundaries, LOB (InterPro:IPR004883); BEST Arabidopsis thaliana protein match is: LOB (LATERAL ORGAN BOUNDARIES) (TAIR:AT5G63090.4); Has 554 Blast hits…
AT1G74810	Chr1:28108473-28111534	3.44071	1.39571	-1.30171	0.00105434	protein_coding	BOR5; anion exchanger		BOR5; FUNCTIONS IN: anion exchanger activity; INVOLVED IN: anion transport; LOCATED IN: integral to membrane, membrane; EXPRESSED IN: 17 plant structures; EXPRESSED DURING: 7 growth stages; CONTAINS InterPro DOMAIN/s: Bicarbonate transporter, eukaryotic (InterPro:IPR003020), Bicarbonate transporter, C-terminal (InterPro:IPR011531); BEST Arabidopsis thaliana protein match is: BOR4 (REQUIRES HIGH B…
AT1G29560	Chr1:10332370-10335694	1.90486	0.76708	-1.31223	0.0111884	protein_coding	nucleic acid binding / zinc ion binding		nucleic acid binding / zinc ion binding; FUNCTIONS IN: zinc ion binding, nucleic acid binding; LOCATED IN: cellular_component unknown; CONTAINS InterPro DOMAIN/s: Zinc finger, CCCH-type (InterPro:IPR000571); BEST Arabidopsis thaliana protein match is: zinc finger protein-related (TAIR:AT1G29570.1); Has 9629 Blast hits to 6369 proteins in 427 species: Archae - 10; Bacteria - 522; Metazoa - 4464; F…
AT5G56550	Chr5:22894501-22896653	11.096	4.44949	-1.31832	0.000340937	protein_coding	OXS3 (OXIDATIVE STRESS 3)	Encodes OXIDATIVE STRESS 3 (OXS3)&#65292; involved in tolerance to heavy metals and oxidative stress.	OXIDATIVE STRESS 3 (OXS3); FUNCTIONS IN: molecular_function unknown; INVOLVED IN: response to oxidative stress, response to cadmium ion, response to stress; LOCATED IN: nuclear speck; EXPRESSED IN: whole plant; BEST Arabidopsis thaliana protein match is: unknown protein (TAIR:AT4G26288.1); Has 117 Blast hits to 117 proteins in 15 species: Archae - 0; Bacteria - 0; Metazoa - 3; Fungi - 0; Plants -…
AT1G62710	Chr1:23223873-23226916	2.6158	1.01656	-1.36355	0.00567065	protein_coding	BETA-VPE (BETA VACUOLAR PROCESSING ENZYME); cysteine-type endopeptidase	Encodes a vacuolar processing enzyme belonging to a novel group of cysteine proteases that is expressed specifically in seeds and is essential for the proper processing of storage proteins.	BETA VACUOLAR PROCESSING ENZYME (BETA-VPE); FUNCTIONS IN: cysteine-type endopeptidase activity; INVOLVED IN: response to salt stress, proteolysis, vacuolar protein processing; LOCATED IN: endomembrane system; EXPRESSED IN: 23 plant structures; EXPRESSED DURING: 13 growth stages; CONTAINS InterPro DOMAIN/s: Peptidase C13, legumain (InterPro:IPR001096); BEST Arabidopsis thaliana protein match is: G…
AT5G14960	Chr5:4843947-4846394	4.62361	1.78508	-1.37303	0.00416556	protein_coding	DEL2 (DP-E2F-LIKE 2); DNA binding / transcription factor		DP-E2F-LIKE 2 (DEL2); FUNCTIONS IN: transcription factor activity, DNA binding; INVOLVED IN: regulation of transcription, DNA-dependent; LOCATED IN: nucleus; EXPRESSED IN: 13 plant structures; EXPRESSED DURING: 7 growth stages; CONTAINS InterPro DOMAIN/s: Winged helix repressor DNA-binding (InterPro:IPR011991), Transcription factor E2F/dimerisation partner (TDP) (InterPro:IPR003316), E2F Family (…
AT2G04170	Chr2:1417181-1419517	3.76286	1.44422	-1.38154	0.0434302	protein_coding	meprin and TRAF homology domain-containing protein / MATH domain-containing protein		meprin and TRAF homology domain-containing protein / MATH domain-containing protein; FUNCTIONS IN: molecular_function unknown; INVOLVED IN: biological_process unknown; LOCATED IN: cellular_component unknown; CONTAINS InterPro DOMAIN/s: TRAF-like (InterPro:IPR008974), MATH (InterPro:IPR002083); BEST Arabidopsis thaliana protein match is: meprin and TRAF homology domain-containing protein / MATH do…
AT1G05835	Chr1:1762223-1766281	21.3828	8.20618	-1.38167	0.0170453	protein_coding	unknown protein		unknown protein; LOCATED IN: endomembrane system; BEST Arabidopsis thaliana protein match is: unknown protein (TAIR:AT1G32583.1); Has 50 Blast hits to 50 proteins in 8 species: Archae - 0; Bacteria - 0; Metazoa - 0; Fungi - 0; Plants - 50; Viruses - 0; Other Eukaryotes - 0 (source: NCBI BLink).
AT5G25370	Chr5:8804239-8807547	0.848361	0.324765	-1.38528	0.0405228	protein_coding	PLDALPHA3 (PHOSPHLIPASE D ALPHA 3); phospholipase D	member of C2-PLD subfamily. Analyses on the gene structures/sequences, overall amino acid sequences, and domain structures indicate that PLDalpha3 is most closely related to other two PLDalphas than to other PLDs. Phylogenetic analysis has not identified a true ortholog for PLDalpha3. Involved in hyperosmotic response.	PHOSPHLIPASE D ALPHA 3 (PLDALPHA3); FUNCTIONS IN: phospholipase D activity; INVOLVED IN: response to salt stress, response to water deprivation, membrane lipid catabolic process, response to abscisic acid stimulus; LOCATED IN: membrane; EXPRESSED IN: leaf apex, flower, root; EXPRESSED DURING: petal differentiation and expansion stage; CONTAINS InterPro DOMAIN/s: C2 calcium/lipid-binding region, C…
AT5G25570	Chr5:8901740-8903219	6.61187	2.51739	-1.39313	0.0377241	protein_coding	unknown protein		unknown protein; FUNCTIONS IN: molecular_function unknown; INVOLVED IN: biological_process unknown; LOCATED IN: cellular_component unknown; EXPRESSED IN: 20 plant structures; EXPRESSED DURING: 13 growth stages; Has 11 Blast hits to 11 proteins in 4 species: Archae - 0; Bacteria - 0; Metazoa - 0; Fungi - 0; Plants - 11; Viruses - 0; Other Eukaryotes - 0 (source: NCBI BLink).
AT4G26090	Chr4:13224337-13230797	4.767	1.80881	-1.39804	0.0144108	protein_coding	RPS2 (RESISTANT TO P. SYRINGAE 2); protein binding	Encodes a plasma membrane protein with leucine-rich repeat, leucine zipper, and P loop domains that confers resistance to Pseudomonas syringae infection by interacting with the avirulence gene avrRpt2. RPS2 protein interacts directly with plasma membrane associated protein RIN4 and this interaction is disrupted by avrRpt2.	RESISTANT TO P. SYRINGAE 2 (RPS2); FUNCTIONS IN: protein binding; INVOLVED IN: defense response to bacterium, detection of bacterium, plant-type hypersensitive response, defense response; LOCATED IN: plasma membrane; EXPRESSED IN: 16 plant structures; EXPRESSED DURING: 9 growth stages; CONTAINS InterPro DOMAIN/s: ATPase, AAA+ type, core (InterPro:IPR003593), NB-ARC (InterPro:IPR002182), Leucine-r…
AT4G27660	Chr4:13817094-13818136	2.67068	0.993001	-1.42734	0.0473351	protein_coding	unknown protein		unknown protein; FUNCTIONS IN: molecular_function unknown; INVOLVED IN: biological_process unknown; LOCATED IN: cellular_component unknown; EXPRESSED IN: 18 plant structures; EXPRESSED DURING: 9 growth stages; BEST Arabidopsis thaliana protein match is: unknown protein (TAIR:AT5G54150.1); Has 67 Blast hits to 61 proteins in 16 species: Archae - 0; Bacteria - 0; Metazoa - 13; Fungi - 0; Plants - 5…
AT5G26850	Chr5:9445439-9450819	21.5409	7.99833	-1.42931	0	protein_coding			INVOLVED IN: biological_process unknown; LOCATED IN: chloroplast; EXPRESSED IN: 23 plant structures; EXPRESSED DURING: 13 growth stages; BEST Arabidopsis thaliana protein match is: cyclin-related (TAIR:AT2G41830.1); Has 199 Blast hits to 197 proteins in 66 species: Archae - 0; Bacteria - 0; Metazoa - 113; Fungi - 19; Plants - 59; Viruses - 0; Other Eukaryotes - 8 (source: NCBI BLink).
AT3G10680	Chr3:3337772-3339345	1.74144	0.639977	-1.44419	0.0223805	protein_coding	heat shock protein-related		heat shock protein-related; FUNCTIONS IN: molecular_function unknown; INVOLVED IN: biological_process unknown; EXPRESSED IN: leaf apex, flower; EXPRESSED DURING: petal differentiation and expansion stage; CONTAINS InterPro DOMAIN/s: Heat shock protein Hsp20 (InterPro:IPR002068), HSP20-like chaperone (InterPro:IPR008978); BEST Arabidopsis thaliana protein match is: RTM2 (RESTRICTED TEV MOVEMENT 2)…
AT4G09820	Chr4:6182022-6186493	0.968527	0.354162	-1.45138	0.0461392	protein_coding	TT8 (TRANSPARENT TESTA 8); DNA binding / transcription factor	TT8 is a regulation factor that acts in a concerted action with TT1, PAP1 and TTG1 on the regulation of flavonoid pathways, namely proanthocyanidin and anthocyanin biosynthesis. Affects dihydroflavonol 4-reductase gene expression. It is thought that a ternary complex composed of TT2, TT8 and TTG1 is necessary for correct expression of BAN in seed endothelium. Also important for important for marg…	TRANSPARENT TESTA 8 (TT8); FUNCTIONS IN: transcription factor activity, DNA binding; INVOLVED IN: trichome differentiation, proanthocyanidin biosynthetic process, flavonoid biosynthetic process; LOCATED IN: nucleus; EXPRESSED IN: stem, hypocotyl, micropylar endosperm; EXPRESSED DURING: C globular stage; CONTAINS InterPro DOMAIN/s: Basic helix-loop-helix dimerisation region bHLH (InterPro:IPR00109…
AT2G01913	Chr2:421623-422626	5.69979	2.06823	-1.46251	0.00650671	protein_coding	unknown protein		unknown protein; FUNCTIONS IN: molecular_function unknown; INVOLVED IN: biological_process unknown; LOCATED IN: cellular_component unknown; Has 16 Blast hits to 16 proteins in 9 species: Archae - 0; Bacteria - 0; Metazoa - 0; Fungi - 0; Plants - 16; Viruses - 0; Other Eukaryotes - 0 (source: NCBI BLink).
AT1G69020	Chr1:25943885-25947197	2.1053	0.761707	-1.46672	0.0018806	protein_coding	prolyl oligopeptidase family protein		prolyl oligopeptidase family protein; FUNCTIONS IN: serine-type peptidase activity, serine-type endopeptidase activity; INVOLVED IN: proteolysis; LOCATED IN: chloroplast; EXPRESSED IN: 23 plant structures; EXPRESSED DURING: 14 growth stages; CONTAINS InterPro DOMAIN/s: Peptidase S9, prolyl oligopeptidase active site region (InterPro:IPR001375), Peptidase S9A, oligopeptidase, N-terminal beta-prope…
AT1G06080	Chr1:1843567-1846302	8.63235	3.07908	-1.48725	2.64e-05	protein_coding	ADS1 (DELTA 9 DESATURASE 1); oxidoreductase	homologous to delta 9 acyl-lipid desaturases of cyanobacteria and acyl-CoA desaturases of yeast and mammals. expression down-regulated by cold temperature.	DELTA 9 DESATURASE 1 (ADS1); FUNCTIONS IN: oxidoreductase activity; INVOLVED IN: lipid metabolic process; EXPRESSED IN: 17 plant structures; EXPRESSED DURING: 13 growth stages; CONTAINS InterPro DOMAIN/s: Fatty acid desaturase, type 1, core (InterPro:IPR015876), Fatty acid desaturase, type 1 (InterPro:IPR005804); BEST Arabidopsis thaliana protein match is: ADS2 (16:0Delta9 Arabidopsis desaturase …
AT1G48745	Chr1:18030703-18031439	5.52286	1.96025	-1.49438	0.00819145	protein_coding	unknown protein		unknown protein; Has 3 Blast hits to 3 proteins in 1 species: Archae - 0; Bacteria - 0; Metazoa - 0; Fungi - 0; Plants - 3; Viruses - 0; Other Eukaryotes - 0 (source: NCBI BLink).
AT1G55320	Chr1:20633359-20636892	2.88557	1.02397	-1.49468	0.000269192	protein_coding	AAE18 (ACYL-ACTIVATING ENZYME 18); catalytic/ ligase	Encodes a protein with similarity to acyl activating enzymes. AAE18 is localized to the peroxisome where it may be involved in metabolism of auxin precursors to active auxins.	ACYL-ACTIVATING ENZYME 18 (AAE18); FUNCTIONS IN: catalytic activity, ligase activity; INVOLVED IN: auxin metabolic process, metabolic process; LOCATED IN: peroxisome; EXPRESSED IN: guard cell; CONTAINS InterPro DOMAIN/s: AMP-dependent synthetase and ligase (InterPro:IPR000873); BEST Arabidopsis thaliana protein match is: AAE17 (ACYL-ACTIVATING ENZYME 17); catalytic/ ligase (TAIR:AT5G23050.1); Has…
AT1G69543	Chr1:26148436-26148781	22.053	7.73031	-1.51238	0.00625381	pseudogene		Pseudogene of AT1G74220
AT1G16330	Chr1:5582386-5584457	2.52934	0.879331	-1.52428	0.0121625	protein_coding	CYCB3;1 (cyclin b3;1); cyclin-dependent protein kinase	core cell cycle genes	cyclin b3;1 (CYCB3;1); FUNCTIONS IN: cyclin-dependent protein kinase activity; INVOLVED IN: regulation of cell cycle; LOCATED IN: nucleus, chloroplast; EXPRESSED IN: 17 plant structures; EXPRESSED DURING: 10 growth stages; CONTAINS InterPro DOMAIN/s: Cyclin, C-terminal (InterPro:IPR004367), Cyclin-like (InterPro:IPR011028), Cyclin-related (InterPro:IPR013763), Cyclin, N-terminal (InterPro:IPR0066…
AT5G65530	Chr5:26190591-26193106	1.7077	0.586936	-1.54078	0.00710771	protein_coding	protein kinase, putative		protein kinase, putative; FUNCTIONS IN: protein serine/threonine kinase activity, protein tyrosine kinase activity, protein kinase activity, kinase activity, ATP binding; INVOLVED IN: protein amino acid phosphorylation; LOCATED IN: cellular_component unknown; EXPRESSED IN: 16 plant structures; EXPRESSED DURING: 8 growth stages; CONTAINS InterPro DOMAIN/s: Protein kinase, ATP binding site (InterPr…
AT4G31400	Chr4:15237369-15239323	4.934	1.68378	-1.55106	0.00801095	protein_coding	DNA-directed DNA polymerase/ damaged DNA binding		DNA-directed DNA polymerase/ damaged DNA binding; FUNCTIONS IN: damaged DNA binding, DNA-directed DNA polymerase activity; INVOLVED IN: DNA repair; EXPRESSED IN: 19 plant structures; EXPRESSED DURING: 11 growth stages; CONTAINS InterPro DOMAIN/s: DNA-repair protein, UmuC-like (InterPro:IPR001126); Has 248 Blast hits to 248 proteins in 104 species: Archae - 0; Bacteria - 2; Metazoa - 132; Fungi - …
AT4G19370	Chr4:10566149-10567838	2.10307	0.716008	-1.55445	0.0252894	protein_coding	unknown protein		unknown protein; FUNCTIONS IN: molecular_function unknown; INVOLVED IN: biological_process unknown; LOCATED IN: endomembrane system; EXPRESSED IN: 9 plant structures; EXPRESSED DURING: LP.06 six leaves visible, 4 anthesis, LP.04 four leaves visible, petal differentiation and expansion stage; CONTAINS InterPro DOMAIN/s: Protein of unknown function DUF1218 (InterPro:IPR009606); BEST Arabidopsis tha…
AT4G28500	Chr4:14082659-14084266	1.83142	0.616612	-1.57053	0.0210758	protein_coding	ANAC073 (ARABIDOPSIS NAC DOMAIN CONTAINING PROTEIN 73); transcription activator/ transcription factor		ARABIDOPSIS NAC DOMAIN CONTAINING PROTEIN 73 (ANAC073); FUNCTIONS IN: transcription factor activity, transcription activator activity; INVOLVED IN: multicellular organismal development, regulation of secondary cell wall thickening; LOCATED IN: nucleus; EXPRESSED IN: 9 plant structures; EXPRESSED DURING: 4 anthesis, petal differentiation and expansion stage; CONTAINS InterPro DOMAIN/s: No apical m…
AT5G52390	Chr5:21263935-21265264	3.62617	1.20565	-1.58864	0.00536486	protein_coding	photoassimilate-responsive protein, putative		photoassimilate-responsive protein, putative; FUNCTIONS IN: molecular_function unknown; INVOLVED IN: biological_process unknown; LOCATED IN: endomembrane system; EXPRESSED IN: 13 plant structures; EXPRESSED DURING: 8 growth stages; CONTAINS InterPro DOMAIN/s: PAR1 (InterPro:IPR009489); BEST Arabidopsis thaliana protein match is: photoassimilate-responsive protein-related (TAIR:AT3G54040.1); Has 2…
AT1G13140	Chr1:4478490-4480325	1.07777	0.351706	-1.6156	0.0254118	protein_coding	CYP86C3; electron carrier/ heme binding / iron ion binding / monooxygenase/ oxygen binding	member of CYP86C	CYP86C3; FUNCTIONS IN: electron carrier activity, monooxygenase activity, iron ion binding, oxygen binding, heme binding; LOCATED IN: endomembrane system; EXPRESSED IN: leaf whorl, petal, sepal, cauline leaf, flower; EXPRESSED DURING: 4 anthesis, petal differentiation and expansion stage; CONTAINS InterPro DOMAIN/s: Cytochrome P450 (InterPro:IPR001128), Cytochrome P450, C-terminal region (InterPr…
AT1G69572	Chr1:26161527-26163496	8.03789	2.57184	-1.64401	0.00366458	other_rna	other RNA	Potential natural antisense gene, locus overlaps with AT1G69570
AT2G29090	Chr2:12494850-12499156	1.82215	0.554713	-1.71583	0.00435051	protein_coding	CYP707A2; (+)-abscisic acid 8'-hydroxylase/ oxygen binding	Encodes a protein with ABA 8'-hydroxylase activity, involved in ABA catabolism. Member of the CYP707A gene family. This gene predominantly accumulates in dry seeds and is up-regulated immediately following imbibition. CYP707A2 appears to play a major role in the rapid decrease in ABA levels during early seed imbibition.	CYP707A2; FUNCTIONS IN: oxygen binding, (+)-abscisic acid 8'-hydroxylase activity; INVOLVED IN: in 7 processes; LOCATED IN: endomembrane system; EXPRESSED IN: 22 plant structures; EXPRESSED DURING: 6 growth stages; CONTAINS InterPro DOMAIN/s: Cytochrome P450 (InterPro:IPR001128), Cytochrome P450, C-terminal region (InterPro:IPR017973), Cytochrome P450, E-class, group I (InterPro:IPR002401), Cytoc…
AT5G44582	Chr5:17980861-17981807	12.2414	3.69608	-1.72771	0.0109857	protein_coding	unknown protein		unknown protein; FUNCTIONS IN: molecular_function unknown; INVOLVED IN: biological_process unknown; LOCATED IN: endomembrane system; BEST Arabidopsis thaliana protein match is: unknown protein (TAIR:AT5G44580.1); Has 16 Blast hits to 16 proteins in 1 species: Archae - 0; Bacteria - 0; Metazoa - 0; Fungi - 0; Plants - 16; Viruses - 0; Other Eukaryotes - 0 (source: NCBI BLink).
AT1G57590	Chr1:21327359-21329763	2.6417	0.769893	-1.77874	0.00193948	protein_coding	carboxylesterase		carboxylesterase; FUNCTIONS IN: carboxylesterase activity; INVOLVED IN: biological_process unknown; EXPRESSED IN: 16 plant structures; EXPRESSED DURING: LP.06 six leaves visible, 4 anthesis, LP.04 four leaves visible, petal differentiation and expansion stage; CONTAINS InterPro DOMAIN/s: Pectinacetylesterase (InterPro:IPR004963); BEST Arabidopsis thaliana protein match is: pectinacetylesterase, p…
AT3G26470	Chr3:9686097-9690827	1.8294	0.527577	-1.79392	0.0337666	protein_coding			FUNCTIONS IN: molecular_function unknown; INVOLVED IN: biological_process unknown; LOCATED IN: cellular_component unknown; EXPRESSED IN: 8 plant structures; EXPRESSED DURING: 4 anthesis, LP.04 four leaves visible, petal differentiation and expansion stage; CONTAINS InterPro DOMAIN/s: Disease resistance, plant (InterPro:IPR014011); BEST Arabidopsis thaliana protein match is: ADR1-L1 (ADR1-like 1);…
AT5G11190	Chr5:3564975-3566051	3.7372	1.07185	-1.80186	0.0276186	protein_coding	SHN3 (shine3); DNA binding / transcription factor	encodes a member of the ERF (ethylene response factor) subfamily B-6 of ERF/AP2 transcription factor family. The protein contains one AP2 domain. There are 12 members in this subfamily including RAP2.11.	shine3 (SHN3); FUNCTIONS IN: transcription factor activity, DNA binding; INVOLVED IN: regulation of transcription, DNA-dependent; LOCATED IN: mitochondrion, nucleus; EXPRESSED IN: anther dehiscence zone, fruit dehiscence zone; CONTAINS InterPro DOMAIN/s: DNA-binding, integrase-type (InterPro:IPR016177), Pathogenesis-related transcriptional factor and ERF, DNA-binding (InterPro:IPR001471); BEST Ar…
AT4G23870	Chr4:12414229-12415049	8.85811	2.53489	-1.80508	8.11e-05	protein_coding	unknown protein		unknown protein; FUNCTIONS IN: molecular_function unknown; INVOLVED IN: biological_process unknown; LOCATED IN: cellular_component unknown; EXPRESSED IN: 23 plant structures; EXPRESSED DURING: 13 growth stages; BEST Arabidopsis thaliana protein match is: unknown protein (TAIR:AT4G11020.1); Has 8 Blast hits to 8 proteins in 1 species: Archae - 0; Bacteria - 0; Metazoa - 0; Fungi - 0; Plants - 8; V…
AT3G28007	Chr3:10408091-10409745	6.56228	1.85279	-1.8245	8e-05	protein_coding	nodulin MtN3 family protein		nodulin MtN3 family protein; LOCATED IN: endomembrane system, integral to membrane, membrane; EXPRESSED IN: 15 plant structures; EXPRESSED DURING: 8 growth stages; CONTAINS InterPro DOMAIN/s: MtN3 and saliva related transmembrane protein, conserved region (InterPro:IPR018169), RAG1-activating protein 1 homologue (InterPro:IPR018179), MtN3 and saliva related transmembrane protein (InterPro:IPR0043…
AT4G08040	Chr4:4887111-4888939	0.980186	0.276411	-1.82624	0.0421034	protein_coding	ACS11; 1-aminocyclopropane-1-carboxylate synthase	encodes an aminotransferase that belongs to ACC synthase gene family structurally	ACS11; FUNCTIONS IN: 1-aminocyclopropane-1-carboxylate synthase activity; INVOLVED IN: ethylene biosynthetic process, biosynthetic process; LOCATED IN: cellular_component unknown; EXPRESSED IN: cotyledon, petiole, leaf; EXPRESSED DURING: LP.10 ten leaves visible, LP.12 twelve leaves visible; CONTAINS InterPro DOMAIN/s: 1-aminocyclopropane-1-carboxylate synthase (InterPro:IPR001176), Pyridoxal pho…
AT2G23690	Chr2:10072276-10075969	1.78768	0.480053	-1.89682	0.0368901	protein_coding	unknown protein		unknown protein; FUNCTIONS IN: molecular_function unknown; INVOLVED IN: N-terminal protein myristoylation; LOCATED IN: cellular_component unknown; EXPRESSED IN: 7 plant structures; EXPRESSED DURING: petal differentiation and expansion stage; BEST Arabidopsis thaliana protein match is: unknown protein (TAIR:AT4G37240.1); Has 121 Blast hits to 121 proteins in 9 species: Archae - 0; Bacteria - 0; Me…
AT4G39890	Chr4:18505961-18507586	9.27047	2.45	-1.91986	7.34e-06	protein_coding	AtRABH1c (Arabidopsis Rab GTPase homolog H1c); GTP binding / protein binding		Arabidopsis Rab GTPase homolog H1c (AtRABH1c); FUNCTIONS IN: protein binding, GTP binding; INVOLVED IN: protein transport, small GTPase mediated signal transduction; LOCATED IN: endomembrane system; EXPRESSED IN: 9 plant structures; EXPRESSED DURING: 6 growth stages; CONTAINS InterPro DOMAIN/s: Ras GTPase (InterPro:IPR001806), Small GTP-binding protein (InterPro:IPR005225), Ras (InterPro:IPR01375…
AT1G49210	Chr1:18201888-18202764	2.05269	0.542188	-1.92065	0.0230218	protein_coding	zinc finger (C3HC4-type RING finger) family protein		zinc finger (C3HC4-type RING finger) family protein; FUNCTIONS IN: protein binding, zinc ion binding; EXPRESSED IN: 9 plant structures; EXPRESSED DURING: LP.06 six leaves visible, 4 anthesis, LP.10 ten leaves visible, petal differentiation and expansion stage; CONTAINS InterPro DOMAIN/s: Zinc finger, RING-type (InterPro:IPR001841), Zinc finger, RING/FYVE/PHD-type (InterPro:IPR013083); BEST Arabid…
AT3G10180	Chr3:3139382-3154644	1.90132	0.497627	-1.93386	0.0212689	protein_coding	kinesin motor protein-related		kinesin motor protein-related; FUNCTIONS IN: microtubule motor activity, ATP binding; INVOLVED IN: microtubule-based movement; LOCATED IN: microtubule associated complex; EXPRESSED IN: 15 plant structures; EXPRESSED DURING: 6 growth stages; CONTAINS InterPro DOMAIN/s: Kinesin, motor region (InterPro:IPR001752); BEST Arabidopsis thaliana protein match is: ZCF125; ATP binding / microtubule motor (T…
AT1G77700	Chr1:29204746-29206217	2.04864	0.515171	-1.99154	0.00980565	protein_coding	pathogenesis-related thaumatin family protein		pathogenesis-related thaumatin family protein; FUNCTIONS IN: molecular_function unknown; INVOLVED IN: response to other organism; LOCATED IN: cellular_component unknown; EXPRESSED IN: 14 plant structures; EXPRESSED DURING: 4 anthesis, C globular stage, petal differentiation and expansion stage, D bilateral stage, E expanded cotyledon stage; CONTAINS InterPro DOMAIN/s: Thaumatin, pathogenesis-rela…
AT1G70260	Chr1:26456843-26459450	2.54608	0.6329	-2.00823	0.000637761	protein_coding	nodulin MtN21 family protein		nodulin MtN21 family protein; FUNCTIONS IN: molecular_function unknown; LOCATED IN: endomembrane system, membrane; CONTAINS InterPro DOMAIN/s: Protein of unknown function DUF6, transmembrane (InterPro:IPR000620); BEST Arabidopsis thaliana protein match is: nodulin-related (TAIR:AT1G60050.1); Has 665 Blast hits to 653 proteins in 32 species: Archae - 0; Bacteria - 20; Metazoa - 0; Fungi - 0; Plant…
AT2G41240	Chr2:17198281-17199320	17.6534	4.25282	-2.05345	4.79e-05	protein_coding	BHLH100 (BASIC HELIX-LOOP-HELIX PROTEIN 100); DNA binding / transcription factor		BASIC HELIX-LOOP-HELIX PROTEIN 100 (BHLH100); FUNCTIONS IN: transcription factor activity, DNA binding; INVOLVED IN: response to water deprivation, regulation of transcription; LOCATED IN: nucleus; CONTAINS InterPro DOMAIN/s: Achaete-scute transcription factor related (InterPro:IPR015660), Basic helix-loop-helix dimerisation region bHLH (InterPro:IPR001092), Helix-loop-helix DNA-binding (InterPro…
AT1G47400	Chr1:17385716-17386186	38.1038	9.09195	-2.06727	2.46e-08	protein_coding	unknown protein		unknown protein; FUNCTIONS IN: molecular_function unknown; INVOLVED IN: biological_process unknown; LOCATED IN: cellular_component unknown; EXPRESSED IN: 12 plant structures; EXPRESSED DURING: 9 growth stages; BEST Arabidopsis thaliana protein match is: unknown protein (TAIR:AT1G47395.1); Has 3 Blast hits to 3 proteins in 1 species: Archae - 0; Bacteria - 0; Metazoa - 0; Fungi - 0; Plants - 3; Vi…
AT4G14130	Chr4:8137050-8138281	3.83466	0.890221	-2.10686	0.000476256	protein_coding	XTR7 (XYLOGLUCAN ENDOTRANSGLYCOSYLASE 7); hydrolase, acting on glycosyl bonds / hydrolase, hydrolyzing O-glycosyl compounds / xyloglucan:xyloglucosyl transferase	xyloglucan endotransglycosylase-related protein (XTR7)	XYLOGLUCAN ENDOTRANSGLYCOSYLASE 7 (XTR7); FUNCTIONS IN: hydrolase activity, acting on glycosyl bonds, xyloglucan:xyloglucosyl transferase activity, hydrolase activity, hydrolyzing O-glycosyl compounds; INVOLVED IN: N-terminal protein myristoylation, carbohydrate metabolic process, cellular glucan metabolic process; LOCATED IN: endomembrane system, apoplast, cell wall; EXPRESSED IN: 22 plant struc…
AT2G03540	Chr2:1073758-1074515	3.21305	0.714122	-2.1697	0.0421933	transposable_element_gene	transposable element gene		similar to unknown protein [Arabidopsis thaliana] (TAIR:AT4G11710.1); similar to hypothetical protein 23.t00046 [Brassica oleracea] (GB:ABD65629.1); contains domain REVERSE TRANSCRIPTASES (PTHR19446); contains domain gb def: Hypothetical protein At2g15600 (PTHR19446:SF12)
AT1G62940	Chr1:23310534-23312747	1.03276	0.228693	-2.17502	0.0144942	protein_coding	ACOS5 (ACYL-COA SYNTHETASE 5); 4-coumarate-CoA ligase/ long-chain-fatty-acid-CoA ligase/ medium-chain-fatty-acid-CoA ligase	encodes an acyl-CoA synthetase, has in vitro activity towards medium- to long-chain fatty acids and their hydroxylated derivatives. Expressed in the tapetum. Involved in pollen wall exine formation. Null mutants were devoid of pollen grains at anther maturity and were completely male sterile.	ACYL-COA SYNTHETASE 5 (ACOS5); FUNCTIONS IN: medium-chain-fatty-acid-CoA ligase activity, long-chain-fatty-acid-CoA ligase activity, 4-coumarate-CoA ligase activity; INVOLVED IN: sporopollenin biosynthetic process, pollen exine formation, acyl-CoA biosynthetic process; LOCATED IN: cytoplasm; EXPRESSED IN: tapetum, leaf whorl, sepal, flower, seed; EXPRESSED DURING: petal differentiation and expans…
AT2G30420	Chr2:12960826-12962162	4.24107	0.892813	-2.248	0.00226891	protein_coding	ETC2; DNA binding / transcription factor	In a tandem repeat with AT2G30424 and AT2G30432	ETC2; FUNCTIONS IN: transcription factor activity, DNA binding; INVOLVED IN: regulation of transcription; LOCATED IN: mitochondrion; CONTAINS InterPro DOMAIN/s: SANT, DNA-binding (InterPro:IPR001005), Myb, DNA-binding (InterPro:IPR014778), Homeodomain-related (InterPro:IPR012287), Myb transcription factor (InterPro:IPR015495); BEST Arabidopsis thaliana protein match is: TCL2 (TRICHOMELESS 2); DNA…
AT1G78440	Chr1:29511598-29513051	1.1713	0.234784	-2.3187	0.0185798	protein_coding	ATGA2OX1 (gibberellin 2-oxidase 1); gibberellin 2-beta-dioxygenase	Encodes a gibberellin 2-oxidase.	gibberellin 2-oxidase 1 (ATGA2OX1); FUNCTIONS IN: gibberellin 2-beta-dioxygenase activity; INVOLVED IN: gibberellin catabolic process; EXPRESSED IN: 10 plant structures; EXPRESSED DURING: 4 anthesis, F mature embryo stage, petal differentiation and expansion stage, D bilateral stage, E expanded cotyledon stage; CONTAINS InterPro DOMAIN/s: Isopenicillin N synthase (InterPro:IPR002283), 2OG-Fe(II) …
AT2G17660	Chr2:7673281-7673712	4.23366	0.776033	-2.44771	0.0317289	protein_coding	nitrate-responsive NOI protein, putative		nitrate-responsive NOI protein, putative; FUNCTIONS IN: molecular_function unknown; INVOLVED IN: response to nitrate; LOCATED IN: cellular_component unknown; EXPRESSED IN: 14 plant structures; EXPRESSED DURING: 9 growth stages; CONTAINS InterPro DOMAIN/s: Defence response, Rin4 (InterPro:IPR008700); BEST Arabidopsis thaliana protein match is: unknown protein (TAIR:AT4G35655.1); Has 139 Blast hits…
AT3G13610	Chr3:4449373-4452624	1.31612	0.208312	-2.65948	0.0455786	protein_coding	oxidoreductase, 2OG-Fe(II) oxygenase family protein		oxidoreductase, 2OG-Fe(II) oxygenase family protein; FUNCTIONS IN: oxidoreductase activity, acting on paired donors, with incorporation or reduction of molecular oxygen, 2-oxoglutarate as one donor, and incorporation of one atom each of oxygen into both donors, dioxygenase activity; INVOLVED IN: coumarin biosynthetic process, response to cyclopentenone, hydrogen peroxide-mediated programmed cell …
AT5G03995	Chr5:1075670-1078304	7.25809	1.03335	-2.81226	0.0400719	protein_coding	unknown protein		unknown protein; FUNCTIONS IN: molecular_function unknown; INVOLVED IN: biological_process unknown; LOCATED IN: cellular_component unknown; Has 1 Blast hits to 1 proteins in 1 species: Archae - 0; Bacteria - 0; Metazoa - 0; Fungi - 0; Plants - 1; Viruses - 0; Other Eukaryotes - 0 (source: NCBI BLink).
AT1G49220	Chr1:18205933-18206701	1.61488	0.20154	-3.00229	0.0289911	protein_coding	zinc finger (C3HC4-type RING finger) family protein		zinc finger (C3HC4-type RING finger) family protein; FUNCTIONS IN: protein binding, zinc ion binding; CONTAINS InterPro DOMAIN/s: Zinc finger, RING-type, conserved site (InterPro:IPR017907), Zinc finger, RING-type (InterPro:IPR001841), Zinc finger, RING/FYVE/PHD-type (InterPro:IPR013083); BEST Arabidopsis thaliana protein match is: zinc finger (C3HC4-type RING finger) family protein (TAIR:AT1G492…
AT5G60440	Chr5:24306293-24307716	0.925848	0.114433	-3.01627	0.0339808	protein_coding	AGL62 (Agamous-like 62); DNA binding / transcription factor	AGL62 encodes a Type I MADS domain protein that likely functions as a transcription factor. It is expressed AGL62 is expressed exclusively in the endosperm. AGL62 supresses suppresses cellularization during the syncytial phase of endosperm development.	Agamous-like 62 (AGL62); FUNCTIONS IN: transcription factor activity, DNA binding; INVOLVED IN: cellularization of endosperm, endosperm development; LOCATED IN: nucleus; EXPRESSED IN: 14 plant structures; EXPRESSED DURING: 7 growth stages; CONTAINS InterPro DOMAIN/s: Transcription factor, MADS-box (InterPro:IPR002100); BEST Arabidopsis thaliana protein match is: MADS-box protein (AGL40) (TAIR:AT4…
AT2G35710	Chr2:15010795-15014284	2.52729	0.266638	-3.24464	0.0357711	protein_coding	glycogenin glucosyltransferase (glycogenin)-related		glycogenin glucosyltransferase (glycogenin)-related; FUNCTIONS IN: transferase activity, transferring hexosyl groups, transferase activity, transferring glycosyl groups; INVOLVED IN: carbohydrate biosynthetic process, biosynthetic process; LOCATED IN: endomembrane system; EXPRESSED IN: 11 plant structures; EXPRESSED DURING: 7 growth stages; CONTAINS InterPro DOMAIN/s: Glycosyl transferase, family…
AT2G42540	Chr2:17711036-17712330	400.548	73.9664	-2.43703	0	protein_coding	COR15A (COLD-REGULATED 15A)	A cold-regulated gene whose product is targeted to the chloroplast and constitutive expression increases freezing tolerance in protoplasts in vitro and chloroplasts in vivo. NMR and x-ray diffraction studies suggest that COR15a alters the intrinsic curvature of the inner membrane of chloroplast envelope.	COLD-REGULATED 15A (COR15A); FUNCTIONS IN: molecular_function unknown; INVOLVED IN: in 8 processes; LOCATED IN: chloroplast stroma, chloroplast, chloroplast envelope; EXPRESSED IN: 21 plant structures; EXPRESSED DURING: 13 growth stages; BEST Arabidopsis thaliana protein match is: COR15B (COLD REGULATED 15B) (TAIR:AT2G42530.1); Has 132 Blast hits to 96 proteins in 31 species: Archae - 0; Bacteria…
AT1G78970	Chr1:29703061-29711421	10.2862	4.16139	-1.30557	3.54e-06	protein_coding	LUP1 (LUPEOL SYNTHASE 1); beta-amyrin synthase/ lupeol synthase	Lupeol synthase. Converts oxidosqualene to multiple triterpene alcohols and a triterpene diols. This conversion proceeds through the formation of a 17&#946;-dammarenyl cation.	LUPEOL SYNTHASE 1 (LUP1); FUNCTIONS IN: beta-amyrin synthase activity, lupeol synthase activity; INVOLVED IN: pentacyclic triterpenoid biosynthetic process; LOCATED IN: cellular_component unknown; EXPRESSED IN: 16 plant structures; EXPRESSED DURING: 9 growth stages; CONTAINS InterPro DOMAIN/s: Terpene synthase, conserved site (InterPro:IPR002365), Terpenoid cylases/protein prenyltransferase alpha…
AT5G15970	Chr5:5211910-5212665	2096.08	1559.01	-0.427067	0.0300081	protein_coding	KIN2	Encodes a gene that can be induced by cold and abscisic acid and may be involved in cold acclimation and salt tolerance.	KIN2; FUNCTIONS IN: molecular_function unknown; INVOLVED IN: response to salt stress, response to water deprivation, response to cold, response to abscisic acid stimulus, response to osmotic stress; LOCATED IN: nucleus, chloroplast, plasma membrane, cytoplasm; BEST Arabidopsis thaliana protein match is: KIN1 (TAIR:AT5G15960.1); Has 53 Blast hits to 53 proteins in 15 species: Archae - 0; Bacteria …
AT2G34655	Chr2:14596630-14597540	8.01883	2.92772	-1.45361	0.000665464	protein_coding	unknown protein		unknown protein; FUNCTIONS IN: molecular_function unknown; INVOLVED IN: biological_process unknown; LOCATED IN: endomembrane system; Has 2 Blast hits to 2 proteins in 1 species: Archae - 0; Bacteria - 0; Metazoa - 0; Fungi - 0; Plants - 2; Viruses - 0; Other Eukaryotes - 0 (source: NCBI BLink).
AT4G22505	Chr4:11851227-11853018	4.80973	1.96629	-1.29048	0.00043142	protein_coding			INVOLVED IN: lipid transport; CONTAINS InterPro DOMAIN/s: Bifunctional inhibitor/plant lipid transfer protein/seed storage (InterPro:IPR016140), Plant lipid transfer protein/seed storage/trypsin-alpha amylase inhibitor (InterPro:IPR003612), Plant lipid transfer protein and hydrophobic protein, helical (InterPro:IPR013770); BEST Arabidopsis thaliana protein match is: unknown protein (TAIR:AT4G2248…
AT4G20320	Chr4:10974462-10979464	6.07568	2.94699	-1.0438	0.0059889	protein_coding	CTP synthase/ catalytic		CTP synthase/ catalytic; FUNCTIONS IN: CTP synthase activity, catalytic activity; INVOLVED IN: pyrimidine ribonucleotide metabolic process, pyrimidine nucleotide biosynthetic process; LOCATED IN: cellular_component unknown; EXPRESSED IN: 18 plant structures; EXPRESSED DURING: 8 growth stages; CONTAINS InterPro DOMAIN/s: Glutamine amidotransferase class-I, C-terminal (InterPro:IPR000991), CTP synt…
AT3G12710	Chr3:4040323-4041982	9.97946	6.50526	-0.617354	0.0301108	protein_coding	methyladenine glycosylase family protein		methyladenine glycosylase family protein; FUNCTIONS IN: DNA-3-methyladenine glycosylase I activity, catalytic activity; INVOLVED IN: DNA repair, base-excision repair; EXPRESSED IN: 20 plant structures; EXPRESSED DURING: 13 growth stages; CONTAINS InterPro DOMAIN/s: DNA glycosylase (InterPro:IPR011257), Methyladenine glycosylase (InterPro:IPR005019); BEST Arabidopsis thaliana protein match is: met…
AT1G10640	Chr1:3515364-3517888	11.488	8.19988	-0.486454	0.0390945	protein_coding	polygalacturonase		polygalacturonase; FUNCTIONS IN: polygalacturonase activity; INVOLVED IN: carbohydrate metabolic process; LOCATED IN: cellular_component unknown; EXPRESSED IN: 18 plant structures; EXPRESSED DURING: 11 growth stages; CONTAINS InterPro DOMAIN/s: Pectin lyase fold/virulence factor (InterPro:IPR011050), Pectin lyase fold (InterPro:IPR012334), Glycoside hydrolase, family 28 (InterPro:IPR000743), Para…
AT1G12845	Chr1:4378938-4379516	41.7791	27.5727	-0.599541	0.0161278	protein_coding	unknown protein		unknown protein; FUNCTIONS IN: molecular_function unknown; INVOLVED IN: biological_process unknown; LOCATED IN: endomembrane system; EXPRESSED IN: 22 plant structures; EXPRESSED DURING: 13 growth stages; Has 4 Blast hits to 4 proteins in 2 species: Archae - 0; Bacteria - 0; Metazoa - 0; Fungi - 0; Plants - 4; Viruses - 0; Other Eukaryotes - 0 (source: NCBI BLink).
AT1G63420	Chr1:23515873-23518910	9.09992	4.85771	-0.905577	0.000381522	protein_coding			INVOLVED IN: biological_process unknown; EXPRESSED IN: 22 plant structures; EXPRESSED DURING: 13 growth stages; CONTAINS InterPro DOMAIN/s: Lipopolysaccharide-modifying protein (InterPro:IPR006598), Protein of unknown function DUF821, CAP10-like (InterPro:IPR008539); BEST Arabidopsis thaliana protein match is: unknown protein (TAIR:AT5G23850.1); Has 456 Blast hits to 452 proteins in 97 species: A…
AT1G80280	Chr1:30183540-30186586	12.6338	8.05936	-0.648552	0.00115512	protein_coding	hydrolase, alpha/beta fold family protein		hydrolase, alpha/beta fold family protein; FUNCTIONS IN: hydrolase activity; EXPRESSED IN: 24 plant structures; EXPRESSED DURING: 15 growth stages; CONTAINS InterPro DOMAIN/s: Alpha/beta hydrolase fold-1 (InterPro:IPR000073); BEST Arabidopsis thaliana protein match is: hydrolase, alpha/beta fold family protein (TAIR:AT1G15490.1); Has 5082 Blast hits to 5073 proteins in 749 species: Archae - 32; B…
AT5G52280	Chr5:21226832-21230254	11.0008	6.90611	-0.671663	0.00140811	protein_coding	protein transport protein-related		protein transport protein-related; FUNCTIONS IN: molecular_function unknown; INVOLVED IN: biological_process unknown; LOCATED IN: chloroplast; EXPRESSED IN: 22 plant structures; EXPRESSED DURING: 13 growth stages; BEST Arabidopsis thaliana protein match is: unknown protein (TAIR:AT1G63300.1); Has 171231 Blast hits to 80783 proteins in 2246 species: Archae - 1716; Bacteria - 22456; Metazoa - 77919…
AT1G52190	Chr1:19434508-19438971	53.8819	41.0802	-0.391358	0.0260916	protein_coding	proton-dependent oligopeptide transport (POT) family protein		proton-dependent oligopeptide transport (POT) family protein; FUNCTIONS IN: transporter activity; INVOLVED IN: oligopeptide transport; LOCATED IN: membrane; EXPRESSED IN: 22 plant structures; EXPRESSED DURING: 13 growth stages; CONTAINS InterPro DOMAIN/s: TGF-beta receptor, type I/II extracellular region, conserved site (InterPro:IPR018456), TGF-beta receptor, type I/II extracellular region (Inte…
AT3G22790	Chr3:8052445-8058757	7.96577	5.12512	-0.636226	0.0010677	protein_coding	kinase interacting family protein		kinase interacting family protein; FUNCTIONS IN: molecular_function unknown; INVOLVED IN: biological_process unknown; LOCATED IN: plasma membrane; EXPRESSED IN: 20 plant structures; EXPRESSED DURING: 13 growth stages; CONTAINS InterPro DOMAIN/s: Prefoldin (InterPro:IPR009053), KIP1-like (InterPro:IPR011684); BEST Arabidopsis thaliana protein match is: unknown protein (TAIR:AT4G14760.1); Has 16799…
AT2G27385	Chr2:11716495-11717330	285.506	150.551	-0.923271	1.76e-08	protein_coding	unknown protein		unknown protein; FUNCTIONS IN: molecular_function unknown; INVOLVED IN: biological_process unknown; LOCATED IN: endomembrane system; BEST Arabidopsis thaliana protein match is: unknown protein (TAIR:AT5G22430.1); Has 15 Blast hits to 15 proteins in 5 species: Archae - 0; Bacteria - 0; Metazoa - 0; Fungi - 0; Plants - 15; Viruses - 0; Other Eukaryotes - 0 (source: NCBI BLink).
AT5G25610	Chr5:8914232-8916800	252.768	152.7	-0.727109	2.49e-05	protein_coding	RD22; nutrient reservoir	responsive to dehydration 22 (RD22) mediated by ABA	RD22; FUNCTIONS IN: nutrient reservoir activity; INVOLVED IN: response to salt stress, response to desiccation, response to abscisic acid stimulus; LOCATED IN: endomembrane system; EXPRESSED IN: 21 plant structures; EXPRESSED DURING: 13 growth stages; CONTAINS InterPro DOMAIN/s: BURP (InterPro:IPR004873); BEST Arabidopsis thaliana protein match is: BURP domain-containing protein (TAIR:AT1G49320.1…
AT1G18330	Chr1:6305965-6308013	3.9	1.99826	-0.964728	0.0194268	protein_coding	EPR1 (EARLY-PHYTOCHROME-RESPONSIVE1); DNA binding / transcription factor	EARLY-PHYTOCHROME-RESPONSIVE1	EARLY-PHYTOCHROME-RESPONSIVE1 (EPR1); FUNCTIONS IN: transcription factor activity, DNA binding; INVOLVED IN: response to cadmium ion, response to ethylene stimulus, response to salt stress, regulation of transcription; EXPRESSED IN: 22 plant structures; EXPRESSED DURING: 13 growth stages; CONTAINS InterPro DOMAIN/s: SANT, DNA-binding (InterPro:IPR001005), Homeodomain-like (InterPro:IPR009057), My…
